# Supplementary material for: Mechanochemical deprotection of t -butoxycarbonyl (Boc) group using basic alumina
Source: Royal Society of Chemistry journal article supplement (doi:10.1039/d4ob01091d), 2024-01-01

Electronic Supplementary Material (ESI) for Organic & Biomolecular Chemistry.  
This journal is © The Royal Society of Chemistry 2024

## Supporting InFoamation

### Mechanochemical Deprotection of *t*-Butoxycarbonyl (Boc)

#### Using Basic Alumina

Kaidi Tian,<sup>a</sup> Tingna Cai,<sup>a</sup> Zedong Zhu,<sup>a</sup> Kai Cheng,<sup>a</sup> Lemao Yu<sup>b</sup>  
and Yong Li<sup>\*a,c</sup>

<sup>a</sup> Zhejiang Key Laboratory of Alternative Technologies for Fine Chemicals Process,  
Shaoxing University, Shaoxing, 312000, People's Republic of China.

<sup>b</sup> Green Pharmaceuticals and Processes Research Centre, Shaoxing University, Shaoxing,  
312000, People's Republic of China.

<sup>c</sup> State Key Laboratory of Medicinal Chemical Biology, College of Pharmacy,  
Nankai University, Tianjin 300350, People's Republic of China.

Fax: (+86) 17857059351; \*E-mail: [liyong@usx.edu.cn](mailto:liyong@usx.edu.cn).

#### List of Contents

|                                                                                                                     |            |
|---------------------------------------------------------------------------------------------------------------------|------------|
| <b>1 General Information</b>                                                                                        | <b>S2</b>  |
| <b>2 Thermally Activated Boc Deprotection Reactions Using Basic Alumina</b>                                         | <b>S3</b>  |
| <b>3 A Comparison of the Mechanochemical De-Boc Reaction<br/>with Other Solvent-free De-Boc methods</b>             | <b>S4</b>  |
| <b>4 Experimental Procedure and Spectroscopic Data of Substrates</b>                                                | <b>S5</b>  |
| <b>5 Experimental Procedure of Mechanochemical Boc Deprotection<br/>Reaction and Spectroscopic Data of Products</b> | <b>S17</b> |
| <b>6 References</b>                                                                                                 | <b>S28</b> |
| <b>7 <sup>1</sup>H and <sup>13</sup>C NMR Spectra of Unknown Substrates</b>                                         | <b>S30</b> |
| <b>8 <sup>1</sup>H and <sup>13</sup>C NMR Spectra of Products</b>                                                   | <b>S41</b> |

## 1. General Information

All reagents and all solvents were used directly as obtained commercially unless otherwise noted. The planetary ball mill (Lichen LC-PBM-0.4L) was purchased from Changsha Tianchuang Powder Technology Co., Ltd.. All types of alumina, including basic alumina (activated, basic, Brockmann I, 199443), were purchased from Sigma-Aldrich. Other reagents were purchased from Anhui Zesheng Science and Technology Co. and Shanghai Bide Pharmaceutical Technology Co.. Reactions were monitored by thin-layer chromatography (TLC) carried out on HSGF254 0.20 mm Huanghai silica gel plates using UV light as a visualizing agent and cerium(IV) ammonium nitrate (CAN) or basic aqueous  $\text{KMnO}_4$  as a developing agent. Melting points (mp) are uncorrected and were recorded on a Büchi M-560 apparatus in open capillary tubes. High-resolution mass spectra (HRMS) were recorded on a Waters Xevo G2-XS QToF mass spectrometer. Nuclear magnetic resonance (NMR) spectra were recorded on a Bruker Advance DMX-400 instrument. Proton magnetic resonance spectra ( $^1\text{H}$  NMR) were recorded at 400 MHz and coupling constants ( $J$ ) are reported to  $\pm 0.5$  Hz. The following abbreviations were utilized to describe peak patterns when appropriate: br = broad, s = singlet, d = doublet, t = triplet, q = quartet and m = multiplet. Carbon magnetic resonance spectra ( $^{13}\text{C}$  NMR) were recorded at 101 MHz. Chemical shifts (H, C) are quoted in parts per million (ppm) and are referenced to the residual solvent peak ( $\text{CDCl}_3$ :  $\delta_{\text{H}} = 7.26$  and  $\delta_{\text{C}} = 77.16$ ; DMSO:  $\delta_{\text{H}} = 2.50$  and  $\delta_{\text{C}} = 39.52$ ).

## 2. Thermally Activated Boc Deprotection Reactions Using Basic Alumina

Table 1. Thermally activated Boc deprotection reactions using basic alumina

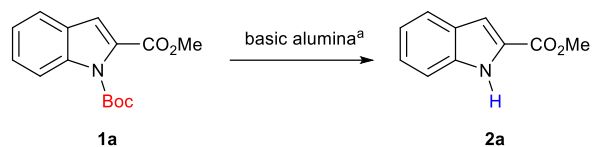

| Entry    | Reaction conditions         | Time [h] | Yield [%] <sup>b</sup> |
|----------|-----------------------------|----------|------------------------|
| 1        | THF, 30°C                   | 1        | Trace                  |
| 2        | ethyl acetate, 30°C         | 1        | Trace                  |
| 3        | acetonitrile, 30°C          | 1        | Trace                  |
| 4        | toluene, 30°C               | 1        | Trace                  |
| 5        | dichloroethane, 30°C        | 1        | 42(49)                 |
| <b>6</b> | <b>dichloroethane, 30°C</b> | <b>9</b> | <b>71(7)</b>           |
| 7        | solvent-free, 30°C          | 1        | 11(83)                 |
| 8        | solvent-free, 30°C          | 9        | 60(19)                 |
| 9        | water, 50°C                 | 1        | Trace                  |
| 10       | ethanol, 50°C               | 1        | Trace                  |
| 9        | dichloroethane, 50°C        | 1        | 53(10)                 |
| 10       | dichloroethane, 70°C        | 1        | 51                     |
| 11       | dichloroethane, 90°C        | 1        | 35                     |

<sup>a</sup> Activated, basic alumina, Brockmann I (~150 mesh) <sup>b</sup> The yield of **2a** was determined from <sup>1</sup>H NMR spectrum through adding 1,3,5-trimethoxybenzene as internal standard. The data in parentheses indicate the amounts of recovered **1a**.

### 3. A Comparison of the Mechanochemical De-Boc Reaction with Other Solvent-free De-Boc methods.

Table 2. A comparison of the mechanochemical de-Boc reaction with other solvent-free de-Boc methods.

| Entry | Ref. No. in paper | Reaction conditions                                                        | Time [h] | Yield [%] | cost of reagent [¥] <sup>a</sup> | sustainability metrics                           |
|-------|-------------------|----------------------------------------------------------------------------|----------|-----------|----------------------------------|--------------------------------------------------|
| 1     | 14a               | Yb(OTf) <sub>3</sub> , SiO <sub>2</sub> , rt or 40 °C                      | 1–60     | 96–100    | 11247                            | solvent-free                                     |
| 2     | 14b               | AlCl <sub>3</sub> , Al <sub>2</sub> O <sub>3</sub> , Microwave irradiation | 1 min    | 76–95     | 2050                             | solvent-free                                     |
| 3     | 14c               | SiO <sub>2</sub> , Microwave irradiation                                   | 1 min    | 56–98     | —                                | solvent-free<br>no waste acid                    |
| 4     | 14d               | I <sub>2</sub> , rt                                                        | 0.5–4    | 80–98     | 240                              | solvent-free<br>no waste acid                    |
| 5     | 14e               | NaCl, H <sub>2</sub> SO <sub>4</sub> , rt                                  | 1–20     | >97       | 881.3                            | solvent-free<br>easy to operate                  |
| 6     | 17                | <i>p</i> -TsOH, ball-milling                                               | 10 mins  | >98       | 1463                             | solvent-free<br>easy to operate                  |
| 7     | our method        | basic Al <sub>2</sub> O <sub>3</sub> , ball-milling                        | 9–24     | 72–99     | 5399                             | solvent-free<br>no waste acid<br>easy to operate |

<sup>a</sup> The cost of reagent needed for 1 mol product, the price of catalyst from Sigma-Aldrich.

#### 4. Spectroscopic Data of Substrates

Substrates **1b**, **1d**, **1e**, **1f**, **1r**, **3c**, **3e**, **5a**, **5b**, **5c**, **7a**, and **7b** were purchased from Anhui Zesheng Science and Technology Co. Substrates **1a**, **1c**, **1g**, **1h**, **1k**, **1m**, **1o**, **1p**, **1q**, **1s**, **3a**, **3d**, **3f**, **3g**, **3h**, **5d**, **5e**, **5f**, **9a**, **9b**, and **9c** were prepared according to reported literature. Compounds **1i**, **1j**, **1l**, **1n**, **3b**, **3i**, **10c**, **11a**, **11b**, and **11c** were new compound.

$^1\text{H}$  and  $^{13}\text{C}$  NMR spectroscopic data of known substrates **1a**, **1c**, **1g**, **1h**, **1k**, **1m**, **1o**, **1p**, **1q**, **1s**, **3a**, **3d**, **3f**, **3g**, **3h**, **5d**, **5e**, **5f**, **9a**, **9b**, and **9c** are as follows:

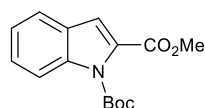

**1-(tert-Butyl) 2-methyl 1H-indole-1,2-dicarboxylate (1a).**<sup>1</sup> White solid. M. p. = 64.1–64.8 °C, reported: 65.0–65.5 °C.  $^1\text{H}$  NMR (400 MHz,  $\text{CDCl}_3$ )  $\delta$  (ppm) 8.11 (dt,  $J = 8.4$ , 0.9 Hz, 1H), 7.60 (dt,  $J = 7.8$ , 1.0 Hz, 1H), 7.42 (ddd,  $J = 8.5$ , 7.2, 1.3 Hz, 1H), 7.26 (td,  $J = 7.4$ , 1.0 Hz, 1H), 7.11 (d,  $J = 0.8$  Hz, 1H), 3.93 (s, 3H), 1.63 (s, 9H).  $^{13}\text{C}$  NMR (101 MHz,  $\text{CDCl}_3$ )  $\delta$  (ppm) 162.4, 149.3, 137.9, 130.4, 127.5, 126.9, 123.3, 122.2, 114.9 (2C), 84.6, 52.3, 27.8.

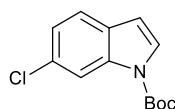

**tert-Butyl 6-chloro-1H-indole-1-carboxylate (1c).**<sup>2</sup> Foam.  $^1\text{H}$  NMR (400 MHz,  $\text{CDCl}_3$ )  $\delta$  (ppm) 8.21 (s, 1H), 7.58 (d,  $J = 3.7$  Hz, 1H), 7.45 (dd,  $J = 8.4$ , 1.5 Hz, 1H), 7.21 (dd,  $J = 8.4$ , 1.9 Hz, 1H), 6.53 (d,  $J = 3.7$  Hz, 1H), 1.69 (s, 9H).  $^{13}\text{C}$  NMR (101 MHz,  $\text{CDCl}_3$ )  $\delta$  (ppm) 149.4, 135.6, 130.2, 129.0, 126.5, 123.3, 121.6, 115.6, 107.1, 84.2, 28.2.

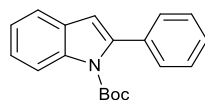

**tert-Butyl 2-phenyl-1H-indole-1-carboxylate (1g).**<sup>3</sup> White solid. M. p. = 77.0–77.8 °C, reported: 76–78 °C.  $^1\text{H}$  NMR (400 MHz,  $\text{CDCl}_3$ )  $\delta$  (ppm) 8.32 (dd,  $J = 8.7$ , 3.9 Hz, 1H), 7.62 (dd,  $J = 7.8$ , 2.8 Hz, 1H), 7.51–7.39 (m, 6H), 7.35–7.30 (m, 1H), 6.72 (d,  $J = 2.7$

Hz, 1H), 1.38 (s, 9H).  $^{13}\text{C}$  NMR (101 MHz,  $\text{CDCl}_3$ )  $\delta$  (ppm) 150.3, 140.6, 137.6, 135.1, 129.3, 128.8, 127.9, 127.7, 124.4, 123.0, 120.5, 115.3, 110.0, 83.4, 27.6.

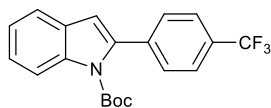

**tert-Butyl 2-(4-(trifluoromethyl)phenyl)-1H-indole-1-carboxylate (1h).**<sup>3</sup> White solid. M. p. = 99.6–100.7 °C, reported: 101–102 °C.  $^1\text{H}$  NMR (400 MHz,  $\text{CDCl}_3$ )  $\delta$  (ppm) 8.28 (d,  $J = 8.4$  Hz, 1H), 7.70 (d,  $J = 8.1$  Hz, 2H), 7.61 (d,  $J = 7.7$  Hz, 1H), 7.57 (d,  $J = 8.1$  Hz, 2H), 7.43–7.39 (m, 1H), 7.33–7.29 (m, 1H), 6.64 (s, 1H), 1.38 (s, 9H).  $^{13}\text{C}$  NMR (101 MHz,  $\text{CDCl}_3$ )  $\delta$  (ppm) 150.0, 138.9, 138.7, 137.7, 129.1 (2C), 125.0, 124.9 (q,  $J = 3.9$  Hz), 124.3 (q,  $J = 272.9$  Hz), 123.3, 120.9, 115.5, 111.2, 84.0, 27.7, only peaks visible.

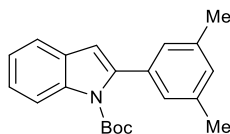

**tert-Butyl 2-(3,5-dimethylphenyl)-1H-indole-1-carboxylate (1k).**<sup>3</sup> Colorless oil.  $^1\text{H}$  NMR (400 MHz,  $\text{CDCl}_3$ )  $\delta$  (ppm) 8.19 (dd,  $J = 8.3, 0.9$  Hz, 1H), 7.56–7.53 (m, 1H), 7.32 (ddd,  $J = 8.4, 7.2, 1.4$  Hz, 1H), 7.26–7.22 (m, 1H), 7.04 (s, 2H), 7.00 (s, 1H), 6.54 (d,  $J = 0.7$  Hz, 1H), 2.36 (s, 6H), 1.32 (s, 9H).  $^{13}\text{C}$  NMR (101 MHz,  $\text{CDCl}_3$ )  $\delta$  (ppm) 150.4, 141.0, 137.6, 137.3, 134.8, 129.4, 129.3, 126.7, 124.2, 123.0, 120.5, 115.2, 109.6, 83.3, 27.7, 21.4.

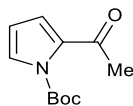

**tert-Butyl 2-acetyl-1H-pyrrole-1-carboxylate (1m).**<sup>4</sup> Yellow oil.  $^1\text{H}$  NMR (400 MHz,  $\text{CDCl}_3$ )  $\delta$  (ppm) 7.22–7.21 (m, 1H), 6.77–6.76 (m, 1H), 6.07–6.05 (m, 1H), 2.34 (s, 3H), 1.48 (s, 9H).  $^{13}\text{C}$  NMR (101 MHz,  $\text{CDCl}_3$ )  $\delta$  (ppm) 188.2, 148.8, 134.0, 127.8, 121.1, 109.9, 84.6, 27.7, 27.4.

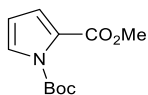

**1-(*tert*-Butyl) 2-methyl 1*H*-pyrrole-1,2-dicarboxylate (1o).**<sup>5</sup> Colorless oil. <sup>1</sup>H NMR (400 MHz, CDCl<sub>3</sub>)  $\delta$  (ppm) 7.23 (dd,  $J = 3.1, 1.8$  Hz, 1H), 6.74 (dd,  $J = 3.5, 1.7$  Hz, 1H), 6.06 (t,  $J = 3.3$  Hz, 1H), 3.74 (s, 3H), 1.48 (s, 9H). <sup>13</sup>C NMR (101 MHz, CDCl<sub>3</sub>)  $\delta$  (ppm) 161.0, 148.2, 126.5, 125.0, 120.6, 110.0, 84.5, 51.6, 27.4.

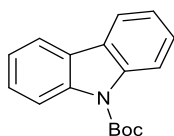

***tert*-Butyl 9*H*-carbazole-9-carboxylate (1p).**<sup>6</sup> Colorless oil. <sup>1</sup>H NMR (400 MHz, CDCl<sub>3</sub>)  $\delta$  (ppm) 8.42–8.39 (m, 2H), 8.01 (dd,  $J = 7.7, 1.3$  Hz, 2H), 7.57–7.52 (m, 2H), 7.43–7.39 (m, 2H), 1.84 (s, 9H). <sup>13</sup>C NMR (101 MHz, CDCl<sub>3</sub>)  $\delta$  (ppm) 151.1, 138.5, 127.1, 125.8, 123.0, 119.6, 116.3, 83.9, 28.4.

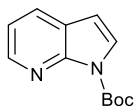

***tert*-Butyl 1*H*-pyrrolo[2,3-*b*]pyridine-1-carboxylate (1q).**<sup>7</sup> Colorless oil. <sup>1</sup>H NMR (400 MHz, CDCl<sub>3</sub>)  $\delta$  (ppm) 8.43 (dd,  $J = 4.8, 1.7$  Hz, 1H), 7.78 (dd,  $J = 7.8, 1.7$  Hz, 1H), 7.54 (d,  $J = 4.1$  Hz, 1H), 7.09 (dd,  $J = 7.8, 4.8$  Hz, 1H), 6.41 (d,  $J = 4.1$  Hz, 1H), 1.58 (s, 9H). <sup>13</sup>C NMR (101 MHz, CDCl<sub>3</sub>)  $\delta$  (ppm) 148.2, 147.7, 144.9, 129.0, 126.4, 122.8, 118.4, 104.4, 83.9, 27.9.

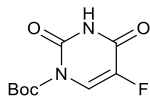

***tert*-Butyl 5-fluoro-2,4-dioxo-3,4-dihydropyrimidine-1(2*H*)-carboxylate (1s).**<sup>8</sup> White solid. M. p. = 262.4–264.6 °C, reported: >250 °C. <sup>1</sup>H NMR (400 MHz, DMSO)  $\delta$  (ppm) 11.93 (br s, 1H), 8.18 (d,  $J = 7.2$  Hz, 1H), 1.52 (s, 9H). <sup>13</sup>C NMR (101 MHz, DMSO)  $\delta$  (ppm) 157.1 (d,  $J = 27.1$  Hz), 147.5, 146.2, 139.9 (d,  $J = 234.1$  Hz), 124.6 (d,  $J = 37.1$  Hz), 86.0, 27.3.

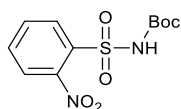

**tert-Butyl ((2-nitrophenyl)sulfonyl)carbamate (3a).**<sup>9</sup> White solid. M. p. = 88.0–89.3 °C. <sup>1</sup>H NMR (400 MHz, CDCl<sub>3</sub>) δ (ppm) 8.35–8.33 (m, 1H), 7.88–7.84 (m, 1H), 7.83–7.76 (m, 2H), 7.69 (br s, 1H), 1.43 (s, 9H). <sup>13</sup>C NMR (101 MHz, CDCl<sub>3</sub>) δ (ppm) 148.7, 148.2, 134.9, 133.4, 132.6, 132.1, 125.2, 85.0, 28.0.

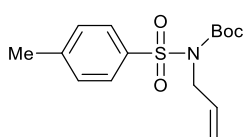

**tert-Butyl allyl(tosyl)carbamate (3d).**<sup>10</sup> Foam. <sup>1</sup>H NMR (400 MHz, CDCl<sub>3</sub>) δ (ppm) 7.78 (d, *J* = 8.4 Hz, 2H), 7.28 (d, *J* = 7.9 Hz, 2H), 5.92 (ddt, *J* = 17.1, 10.2, 5.7 Hz, 1H), 5.30 (dd, *J* = 17.1, 1.4 Hz, 1H), 5.22 (dd, *J* = 10.2, 1.3 Hz, 1H), 4.43 (dt, *J* = 5.8, 1.4 Hz, 2H), 2.42 (s, 3H), 1.33 (s, 9H). <sup>13</sup>C NMR (101 MHz, CDCl<sub>3</sub>) δ (ppm) 150.8, 144.2, 137.3, 133.3, 129.3, 128.2, 118.1, 84.3, 48.9, 27.9, 21.7.

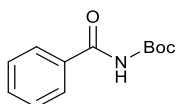

**tert-Butyl benzoylcarbamate (3f).**<sup>11</sup> White solid. M. p. = 146.5–148.2 °C, reported: 149–151 °C. <sup>1</sup>H NMR (400 MHz, CDCl<sub>3</sub>) δ (ppm) 8.25 (br s, 1H), 7.82–7.80 (m, 2H), 7.56–7.51 (m, 1H), 7.45–7.41 (m, 2H), 1.50 (s, 9H). <sup>13</sup>C NMR (101 MHz, CDCl<sub>3</sub>) δ (ppm) 165.4, 149.9, 133.3, 132.8, 128.8, 127.6, 82.8, 28.0.

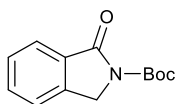

**tert-Butyl 1-oxoisindoline-2-carboxylate (3g).**<sup>12</sup> White solid. M. p. = 118.2–119.3 °C, reported: 121–123 °C. <sup>1</sup>H NMR (400 MHz, CDCl<sub>3</sub>) δ (ppm) 7.87–7.85 (m, 1H), 7.59 (td, *J* = 7.5, 1.2 Hz, 1H), 7.46–7.42 (m, 2H), 4.72 (s, 2H), 1.57 (s, 9H). <sup>13</sup>C NMR (101 MHz, CDCl<sub>3</sub>) δ (ppm) 166.7, 150.4, 140.7, 133.6, 131.5, 128.5, 125.0, 123.1, 83.1, 49.2,



28.2.

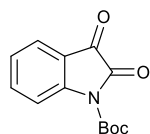

**tert-Butyl 2,3-dioxindoline-1-carboxylate (3h).**<sup>13</sup> Foam. <sup>1</sup>H NMR (400 MHz, DMSO-*d*<sub>6</sub>)  $\delta$  (ppm) 7.94 (dt, *J* = 8.3, 0.8 Hz, 1H), 7.78–7.73 (m, 1H), 7.70–7.68 (m, 1H), 7.31 (td, *J* = 7.5, 0.9 Hz, 1H), 1.59 (s, 9H). <sup>13</sup>C NMR (101 MHz, DMSO-*d*<sub>6</sub>)  $\delta$  (ppm) 179.8, 156.0, 148.2, 147.4, 137.7, 124.9, 124.4, 119.3, 116.1, 84.1, 27.7.

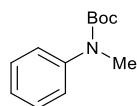

**tert-Butyl methyl(phenyl)carbamate (5d).**<sup>14</sup> Colorless oil. <sup>1</sup>H NMR (400 MHz, CDCl<sub>3</sub>)  $\delta$  (ppm) 7.34–7.30 (m, 2H), 7.26–7.23 (m, 2H), 7.19–7.14 (m, 1H), 3.26 (s, 3H), 1.47 (s, 9H). <sup>13</sup>C NMR (101 MHz, CDCl<sub>3</sub>)  $\delta$  (ppm) 154.7, 143.7, 128.5, 125.5, 125.3, 80.1, 37.2, 28.2.

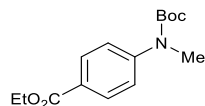

**Ethyl 4-((tert-butoxycarbonyl)(methyl)amino)benzoate (5e).**<sup>15</sup> Foam. <sup>1</sup>H NMR (400 MHz, CDCl<sub>3</sub>)  $\delta$  (ppm) 7.97 (d, *J* = 8.7 Hz, 2H), 7.30 (d, *J* = 8.7 Hz, 2H), 4.34 (q, *J* = 7.1 Hz, 2H), 3.27 (s, 3H), 1.45 (s, 9H), 1.36 (t, *J* = 7.1 Hz, 3H). <sup>13</sup>C NMR (101 MHz, CDCl<sub>3</sub>)  $\delta$  (ppm) 166.2, 154.3, 147.9, 130.1, 126.9, 124.5, 81.1, 61.0, 37.0, 28.4, 14.4.

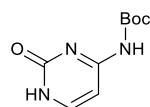

**tert-Butyl (2-oxo-1,2-dihydropyrimidin-4-yl)carbamate (5f).**<sup>16</sup> White solid. M. p. = 275 °C (dec.), reported: 270 °C (dec.). <sup>1</sup>H NMR (400 MHz, DMSO-*d*<sub>6</sub>)  $\delta$  (ppm) 7.74 (d, *J* = 7.1 Hz, 1H), 6.88 (d, *J* = 7.0 Hz, 1H), 1.45 (s, 9H).

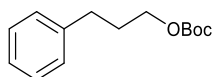

**tert-Butyl (3-phenylpropyl) carbonate (9a).**<sup>17</sup> Colorless oil. <sup>1</sup>H NMR (400 MHz, CDCl<sub>3</sub>)  $\delta$  (ppm) 7.31–7.28 (m, 2H), 7.22–7.18 (m, 3H), 4.10 (t,  $J$  = 6.6 Hz, 2H), 2.72 (dd,  $J$  = 8.8, 6.7 Hz, 2H), 2.03–1.96 (m, 2H), 1.52 (s, 9H). <sup>13</sup>C NMR (101 MHz, CDCl<sub>3</sub>)  $\delta$  (ppm) 153.5, 141.0, 128.3 (2C), 125.9, 81.6, 66.2, 31.9, 30.2, 27.7.

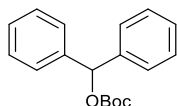

**Benzhydryl tert-butyl carbonate (9b).**<sup>18</sup> White solid. M. p. = 74.0–74.7 °C, reported: 72–74 °C. <sup>1</sup>H NMR (400 MHz, CDCl<sub>3</sub>)  $\delta$  (ppm) 7.43–7.29 (m, 10H), 6.70 (s, 1H), 1.51 (s, 9H). <sup>13</sup>C NMR (101 MHz, CDCl<sub>3</sub>)  $\delta$  (ppm) 153.0, 140.2, 128.6, 128.0, 127.0, 82.5, 79.9, 27.9.

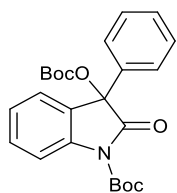

**tert-Butyl 3-((tert-butoxycarbonyl)oxy)-2-oxo-3-phenylindoline-1-carboxylate (9c).**<sup>19</sup> White solid. M. p. = 134.9–135.8 °C, reported: 135–137 °C. <sup>1</sup>H NMR (400 MHz, CDCl<sub>3</sub>)  $\delta$  (ppm) 7.99 (d,  $J$  = 8.2 Hz, 1H), 7.45 (td,  $J$  = 7.9, 1.5 Hz, 1H), 7.34–7.30 (m, 6H), 7.26–7.22 (m, 1H), 1.61 (s, 9H), 1.38 (s, 9H). <sup>13</sup>C NMR (101 MHz, CDCl<sub>3</sub>)  $\delta$  (ppm) 171.7, 151.1, 149.2, 140.7, 136.0, 130.5, 129.2, 128.6, 127.4, 126.8, 125.1, 124.1, 115.5, 84.6, 84.0, 81.7, 28.1, 27.6.

General procedure for the preparation of substrates **1i**, **1j**, **1l**, and **1n**: Add unprotected heterocyclic compounds (10.0 mmol), 4-dimethylaminopyridine (25.0 mg, 0.200 mmol), Et<sub>3</sub>N (1.72 g, 17.0 mmol) and 10 mL of DCM into the reaction flask. Then Add Boc<sub>2</sub>O (2.40 g dissolved in 20 mL DCM, 11.0 mmol) to the reaction system at 0–5 °C for 10 min. After completion of the reaction, it was quenched with saturated aqueous NaHCO<sub>3</sub> (50 mL). After extraction with CH<sub>2</sub>Cl<sub>2</sub> (3 × 25 mL), the combined organic phases were washed with brine (20 mL), dried over anhydrous Na<sub>2</sub>SO<sub>4</sub>, and filtered. The solvent was removed under vacuum, and the residue was purified by flash column chromatography using ethyl acetate/petroleum ether as the eluent.

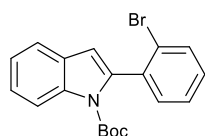

**tert-Butyl 2-(2-bromophenyl)-1H-indole-1-carboxylate (1i)**. Yellow solid (2.93 g, 79%). M. p. = 81.3–82.6 °C. <sup>1</sup>H NMR (400 MHz, CDCl<sub>3</sub>) δ (ppm) 8.44–8.41 (m, 1H), 7.69–7.63 (m, 2H), 7.48–7.39 (m, 3H), 7.36–7.26 (m, 2H), 6.60–6.57 (m, 1H), 1.36 (m, 9H). <sup>13</sup>C NMR (101 MHz, CDCl<sub>3</sub>) δ (ppm) 149.8, 138.2, 137.0, 136.7, 132.1, 131.3, 129.4, 129.0, 127.0, 124.8, 124.7, 123.0, 120.7, 115.7, 110.3, 83.2, 27.6. HRMS (ESI): m/z [M+Na]<sup>+</sup> calcd for C<sub>19</sub>H<sub>18</sub>BrNNaO<sub>2</sub><sup>+</sup>: 394.0413; found: 394.0418.

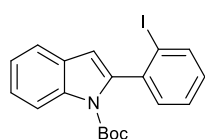

**tert-Butyl 2-(2-iodophenyl)-1H-indole-1-carboxylate (1j)**. Yellow oil (3.06 g, 73%). <sup>1</sup>H NMR (400 MHz, CDCl<sub>3</sub>) δ (ppm) 8.57 (d, *J* = 8.4 Hz, 1H), 7.99 (d, *J* = 7.9 Hz, 1H), 7.71 (d, *J* = 7.8 Hz, 1H), 7.53–7.47 (m, 3H), 7.41 (t, *J* = 7.4 Hz, 1H), 7.18–7.14 (m, 1H), 6.61 (s, 1H), 1.43 (s, 9H). <sup>13</sup>C NMR (101 MHz, CDCl<sub>3</sub>) δ (ppm) 149.5, 141.0, 140.6, 138.2, 136.4, 130.5, 129.3, 128.9, 127.5, 124.5, 122.9, 120.6, 115.7, 110.0, 100.7, 82.9, 27.5. HRMS (ESI): m/z [M+Na]<sup>+</sup> calcd for C<sub>19</sub>H<sub>18</sub>INNaO<sub>4</sub><sup>+</sup>: 442.0274; found: 442.0284.

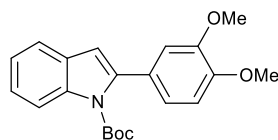

**tert-Butyl 2-(3,4-dimethoxyphenyl)-1H-indole-1-carboxylate (1l).** White solid (3.11 g, 88%). M. p. = 92.9–93.5 °C. <sup>1</sup>H NMR (400 MHz, CDCl<sub>3</sub>) δ (ppm) 8.19 (dd, *J* = 8.3, 1.0 Hz, 1H), 7.55 (dt, *J* = 7.7, 1.0 Hz, 1H), 7.33 (ddd, *J* = 8.4, 7.2, 1.4 Hz, 1H), 7.26 (td, *J* = 7.4, 1.1 Hz, 1H), 7.01 (dd, *J* = 8.2, 2.0 Hz, 1H), 6.95 (d, *J* = 2.0 Hz, 1H), 6.92 (d, *J* = 8.3 Hz, 1H), 6.55 (s, 1H), 3.94 (s, 3H), 3.91 (s, 3H), 1.38 (s, 9H). <sup>13</sup>C NMR (101 MHz, CDCl<sub>3</sub>) δ (ppm) 150.3, 148.7, 148.3, 140.5, 137.3, 129.3, 127.6, 124.2, 123.0, 121.1, 120.4, 115.2, 112.1, 110.5, 109.7, 83.4, 56.0 (2C), 27.8. HRMS (ESI): *m/z* [M+Na]<sup>+</sup> calcd for C<sub>21</sub>H<sub>23</sub>NaO<sub>4</sub><sup>+</sup>: 376.1519; found: 376.1528.

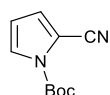

**tert-Butyl 2-cyano-1H-pyrrole-1-carboxylate (1n).** Foam (1.75 g, 91%). <sup>1</sup>H NMR (400 MHz, CDCl<sub>3</sub>) δ (ppm) 7.40–7.38 (m, 1H), 6.90–6.88 (m, 1H), 6.22–6.20 (m, 1H), 1.58 (s, 9H). <sup>13</sup>C NMR (101 MHz, CDCl<sub>3</sub>) δ (ppm) 146.7, 125.6, 125.6, 112.8, 111.7, 103.5, 86.7, 27.6. HRMS (ESI): *m/z* [M+H]<sup>+</sup> calcd for C<sub>10</sub>H<sub>12</sub>N<sub>2</sub>NaO<sub>2</sub><sup>+</sup>: 215.0791; found: 215.0793.

Add *o*-NsBocNH (3.02 g, 10.0 mmol), but-3-yn-1-ol (840 mg, 12.0 mmol), PPh<sub>3</sub> (3.15 g, 12.0 mmol) and 20 mL of THF into the reaction flask. Then Add di-*tert*-butyl azodicarboxylate (DTBAD, 2.75 g 12.0 mmol) to the reaction system at 0–5 °C for 10 min. After completion of the reaction, it was quenched with saturated aqueous NaHCO<sub>3</sub> (50 mL). After extraction with CH<sub>2</sub>Cl<sub>2</sub> (3 × 25 mL), the combined organic phases were washed with brine (20 mL), dried over anhydrous Na<sub>2</sub>SO<sub>4</sub>, and filtered. The solvent was removed under vacuum, and the residue was purified by flash column chromatography using ethyl acetate/petroleum ether (1: 5) as the eluent.

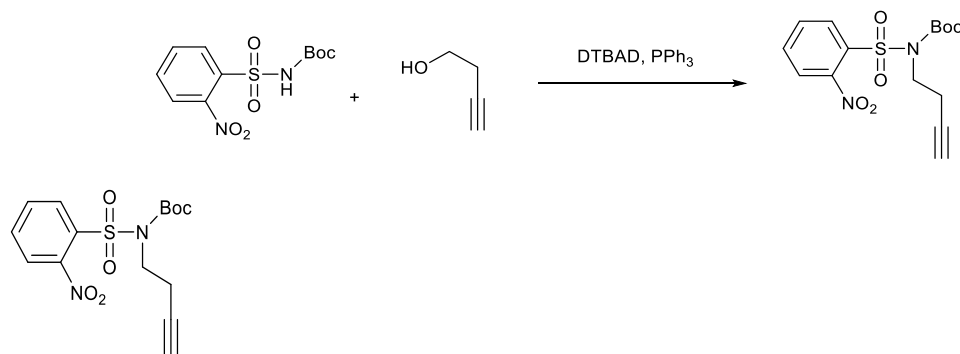

**tert-Butyl but-3-yn-1-yl((2-nitrophenyl)sulfonyl)carbamate (3b).** Foam (3.22 g, 91%).  $^1\text{H}$  NMR (400 MHz,  $\text{CDCl}_3$ )  $\delta$  (ppm) 8.38–8.25 (m, 1H), 7.85–7.64 (m, 3H), 4.06–3.85 (m, 2H), 2.83–2.42 (m, 2H), 2.06 (t,  $J = 2.7$  Hz, 1H), 1.37 (s, 9H).  $^{13}\text{C}$  NMR (101 MHz,  $\text{CDCl}_3$ )  $\delta$  (ppm) 150.2, 147.7, 134.4, 133.6, 133.5, 131.9, 124.5, 85.5, 80.2, 70.8, 46.2, 27.9, 20.1. HRMS (ESI):  $m/z$   $[\text{M}+\text{Na}]^+$  calcd for  $\text{C}_{15}\text{H}_{18}\text{N}_2\text{NaO}_6\text{S}^+$ : 377.0778; found: 377.0787.

Add unprotected amide (1.68 g, 10.0 mmol), 4-dimethylaminopyridine (50.0 mg, 0.400 mmol),  $\text{Et}_3\text{N}$  (3.44 g, 34.0 mmol) and 20 mL of DCM into the reaction flask. Then Add  $\text{Boc}_2\text{O}$  (4.80 g dissolved in 20 mL DCM, 22.0 mmol) to the reaction system at 0–5 °C for 10 min. After completion of the reaction, it was quenched with saturated aqueous  $\text{NaHCO}_3$  (50 mL). After extraction with  $\text{CH}_2\text{Cl}_2$  (3  $\times$  25 mL), the combined organic phases were washed with brine (20 mL), dried over anhydrous  $\text{Na}_2\text{SO}_4$ , and filtered. The solvent was removed under vacuum, and the residue was purified by flash column chromatography using ethyl acetate/petroleum ether as the eluent.

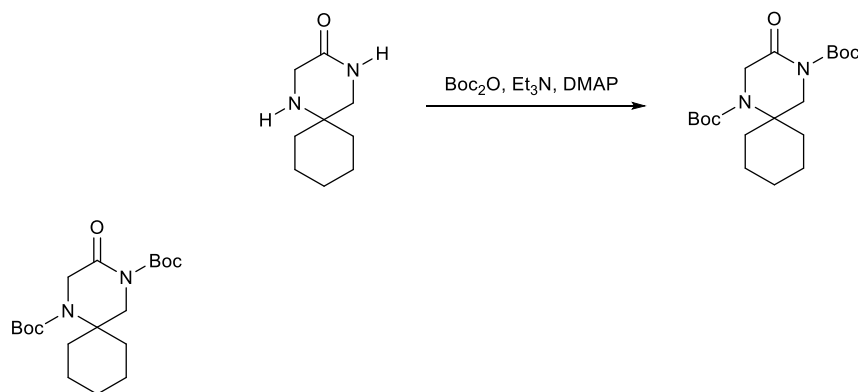

**Di-tert-Butyl 3-oxo-1,4-diazaspiro[5.5]undecane-1,4-dicarboxylate (3i).** White solid (2.60 g, 75%). M. p. = 207.6–210.7 °C.  $^1\text{H}$  NMR (400 MHz,  $\text{CDCl}_3$ )  $\delta$  (ppm) 4.14

(s, 2H), 3.90 (s, 2H), 2.63–2.57 (m, 2H), 1.69–1.61 (m, 3H), 1.52 (s, 9H), 1.43 (s, 9H), 1.39–1.18 (m, 5H).  $^{13}\text{C}$  NMR (101 MHz,  $\text{CDCl}_3$ )  $\delta$  (ppm) 168.2, 151.2, 84.0, 80.8, 59.3, 49.3, 48.1, 29.9, 28.5, 28.1, 24.9, 23.3, only peaks visible. HRMS (ESI):  $m/z$   $[\text{M}+\text{H}]^+$  calcd for  $\text{C}_{19}\text{H}_{33}\text{N}_2\text{O}_5^+$ : 369.2384; found: 369.2385.

Sequentially add **9c** (1.00 mmol, 1.00 equiv), basic alumina (5.10 g, 50.0 mmol, 50.0 equiv), and 90 g of steel balls into a 50 mL steel vessel. Place the mixture in a planetary ball mill. The mechanochemical reaction was conducted at room temperature at the rotate speed of 500 rpm in 9 hours with the milling cycle, consisting of a 10-minute grinding time followed by a 60-minute pause. After that, the mixture in the vessel was transferred into a 250 mL Erlenmeyer flask, and 50 mL  $\text{CH}_2\text{Cl}_2$  was added to dissolve the organic compounds. The mixture in the flask was filtered through a microfiltration membrane (diameter 50 mm, aperture 0.45  $\mu\text{m}$ ). The solvent was removed under vacuum, and the residue was purified by flash column chromatography using ethyl acetate/petroleum ether (1: 5) as the eluent.

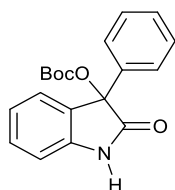

**tert-Butyl (2-oxo-3-phenylindolin-3-yl) carbonate (10c).** Foam.  $^1\text{H}$  NMR (400 MHz,  $\text{CDCl}_3$ )  $\delta$  (ppm) 8.64 (br s, 1H), 7.38 (ddt,  $J = 6.0, 3.1, 1.7$  Hz, 2H), 7.32–7.25 (m, 5H), 7.07 (td,  $J = 7.6, 0.9$  Hz, 1H), 6.92 (d,  $J = 7.8$  Hz, 1H), 1.40 (s, 9H).  $^{13}\text{C}$  NMR (101 MHz,  $\text{CDCl}_3$ )  $\delta$  (ppm) 176.3, 151.2, 141.8, 136.2, 130.3, 129.0, 128.6, 126.4, 124.6, 123.2, 110.7, 83.8, 82.4, 27.7, only peaks visible. HRMS (ESI):  $m/z$   $[\text{M}+\text{Na}]^+$  calcd for  $\text{C}_{19}\text{H}_{19}\text{NNaO}_4^+$ : 348.1206; found: 348.1216.

Sequentially add **2a** (1.00 g, 5.71 mmol), dimethyl carbonate (7.20 g, 80.0 mmol), DABCO (64.0 mg, 0.57 mmol) and 1 mL of DMF into the reaction flask. The reaction system was stirred at 94  $^\circ\text{C}$  for 2 h. After completion of the reaction, it was quenched with saturated aqueous  $\text{NaHCO}_3$  (20 mL). After extraction with  $\text{CH}_2\text{Cl}_2$  ( $3 \times 15$  mL),

the combined organic phases were washed with brine (20 mL), dried over anhydrous Na<sub>2</sub>SO<sub>4</sub>, and filtered. The solvent was removed under vacuum, and the residue was purified by flash column chromatography using ethyl acetate/petroleum ether (1: 3) as the eluent.

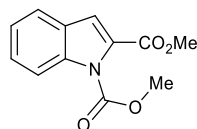

**Dimethyl 1*H*-indole-1,2-dicarboxylate (11a).** Foam (1.12 g, 84%). <sup>1</sup>H NMR (400 MHz, CDCl<sub>3</sub>) δ (ppm) 7.69 (dt, *J* = 8.0, 1.1 Hz, 1H), 7.44–7.33 (m, 2H), 7.30 (d, *J* = 0.8 Hz, 1H), 7.16 (ddd, *J* = 7.9, 6.4, 1.5 Hz, 1H), 4.09 (s, 3H), 3.92 (s, 3H). <sup>13</sup>C NMR (101 MHz, CDCl<sub>3</sub>) δ (ppm) 162.8, 139.8, 127.8, 126.0, 125.1, 122.7, 120.7, 110.4, 110.3, 51.8, 31.7, only peaks visible. HRMS (ESI): *m/z* [M+H]<sup>+</sup> calcd for C<sub>12</sub>H<sub>12</sub>NO<sub>4</sub><sup>+</sup>: 234.0761; found: 234.0770.

Sequentially add **2a** (1.00 g, 5.71 mmol), diethyl carbonate (1.02 g, 6.30 mmol), DAMP (139 mg, 1.14 mmol), 20 mL of THF, and Et<sub>3</sub>N (638 mg, 6.30 mmol) into the reaction flask. The reaction system was stirred at 30 °C for 4 h. After completion of the reaction, it was quenched with saturated aqueous NaHCO<sub>3</sub> (20 mL). After extraction with CH<sub>2</sub>Cl<sub>2</sub> (3 × 15 mL), the combined organic phases were washed with brine (20 mL), dried over anhydrous Na<sub>2</sub>SO<sub>4</sub>, and filtered. The solvent was removed under vacuum, and the residue was purified by flash column chromatography using ethyl acetate/petroleum ether (1: 5) as the eluent.

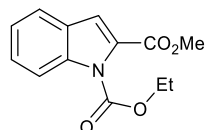

**1-Ethyl 2-methyl 1*H*-indole-1,2-dicarboxylate (11b).** Colorless oil (1.37 g, 89%). <sup>1</sup>H NMR (400 MHz, CDCl<sub>3</sub>) δ (ppm) 8.08 (d, *J* = 8.4 Hz, 1H), 7.61 (d, *J* = 7.9 Hz, 1H), 7.45–7.41 (m, 1H), 7.28 (t, *J* = 7.4 Hz, 1H), 7.15 (s, 1H), 4.47 (q, *J* = 7.1 Hz, 2H), 3.92 (s, 3H), 1.43 (t, *J* = 7.1 Hz, 3H). <sup>13</sup>C NMR (101 MHz, CDCl<sub>3</sub>) δ (ppm) 162.3, 150.9,

137.7, 130.4, 127.7, 127.1, 123.6, 122.4, 115.7, 115.1, 64.1, 52.5, 14.2. HRMS (ESI):  $m/z$   $[M+Na]^+$  calcd for  $C_{13}H_{13}NNaO_4^+$ : 270.0737; found: 270.0744.

Sequentially add **2a** (1.00 g, 5.71 mmol), 10 mL of THF, and NaH (343 g, 8.57 mmol), into the reaction flask at 0–5°C. Then add isopropyl chlorocarbonate (1.05 g, 8.57 mmol) into the reaction system dropwise. After completion of the reaction, it was quenched with saturated aqueous  $NaHCO_3$  (20 mL). After extraction with  $CH_2Cl_2$  ( $3 \times 15$  mL), the combined organic phases were washed with brine (20 mL), dried over anhydrous  $Na_2SO_4$ , and filtered. The solvent was removed under vacuum, and the residue was purified by flash column chromatography using ethyl acetate/petroleum ether (1: 5) as the eluent.

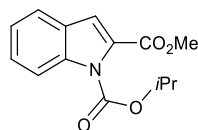

**1-Isopropyl 2-methyl 1H-indole-1,2-dicarboxylate (11c).** Colorless oil (1.10 g, 77%).  $^1H$  NMR (400 MHz,  $CDCl_3$ )  $\delta$  (ppm) 8.10 (dd,  $J = 8.5, 0.9$  Hz, 1H), 7.57 (dd,  $J = 7.9, 1.0$  Hz, 1H), 7.40 (ddd,  $J = 8.5, 7.2, 1.3$  Hz, 1H), 7.26–7.22 (m, 1H), 7.11 (d,  $J = 0.9$  Hz, 1H), 5.22 (p,  $J = 6.4$  Hz, 1H), 3.90 (s, 3H), 1.40 (d,  $J = 6.4$  Hz, 6H).  $^{13}C$  NMR (101 MHz,  $CDCl_3$ )  $\delta$  (ppm) 162.2, 150.2, 137.6, 130.3, 127.5, 126.8, 123.4, 122.2, 115.2, 114.92, 72.4, 52.3, 21.6. HRMS (ESI):  $m/z$   $[M+Na]^+$  calcd for  $C_{14}H_{15}NNaO_4^+$ : 284.0893; found: 284.0903.



## 5. Experimental Procedure of Mechanochemical Boc Deprotection Reaction and Spectroscopic Data of Products

General procedure of mechanochemical Boc deprotection reaction: Sequentially add Boc compound (1.00 mmol, 1.00 equiv), basic alumina (5.10 g, 50.0 mmol, 50.0 equiv), and 90 g of steel balls into a 50 mL steel vessel. Place the mixture in a planetary ball mill. The mechanochemical reaction was conducted at room temperature (22–28°C) at the rotate speed of 500 rpm in 9, 16 or 24 hours with the milling cycle, consisting of a 10-minute grinding time followed by a 60-minute pause. After that, the mixture in the vessel was transferred into a 250 mL Erlenmeyer flask, and 50 mL CH<sub>2</sub>Cl<sub>2</sub> was added to dissolve the organic compounds. The mixture in the flask was filtered through a microfiltration membrane (diameter 50 mm, aperture 0.45 μm). Finally, the filtrate was concentrated to afford the product.

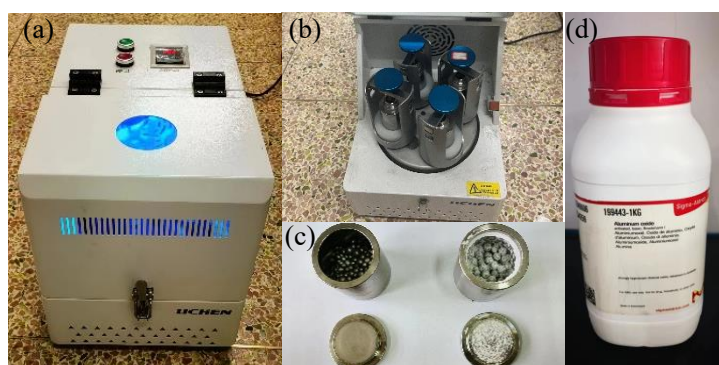

Fig.1. Experimental equipment. (a) Planetary ball mill (Lichen LC-PBM-0.4L). (b) Four 50 mL steel vessels. (c) Two vessels containing the reaction mixture and balls. The left was before the milling process, and the right was after the process. (d) Auxiliary agent: Alumina, activated, basic, Brockmann I, from Sigma-Aldrich

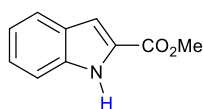

**Methyl 1*H*-indole-2-carboxylate (2a).**<sup>20</sup> White solid (157.6 mg, 90%). M. p. = 148.9–150.6 °C, reported: 152.5–153.0 °C. <sup>1</sup>H NMR (400 MHz, CDCl<sub>3</sub>) δ (ppm) 9.29 (br s,

1H), 7.73–7.70 (m, 1H), 7.46–7.43 (m, 1H), 7.34 (ddd,  $J = 8.2, 7.0, 1.2$  Hz, 1H), 7.25 (dd,  $J = 2.2, 1.0$  Hz, 1H), 7.17 (ddd,  $J = 8.1, 6.9, 1.0$  Hz, 1H), 3.98 (s, 3H).  $^{13}\text{C}$  NMR (101 MHz,  $\text{CDCl}_3$ )  $\delta$  (ppm) 162.8, 137.1, 127.6, 127.2, 125.5, 122.7, 120.9, 112.1, 108.9, 52.2.

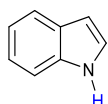

**1H-indole (2b).**<sup>21</sup> White solid (100.5 mg, 86%). M. p. = 51.4–51.8 °C, reported: 52–53 °C.  $^1\text{H}$  NMR (400 MHz,  $\text{CDCl}_3$ )  $\delta$  (ppm) 8.06 (br s, 1H), 7.71 (d,  $J = 7.8$  Hz, 1H), 7.42–7.40 (m, 1H), 7.28–7.23 (m, 1H), 7.21–7.16 (m, 2H), 6.62–6.60 (m, 1H).  $^{13}\text{C}$  NMR (101 MHz,  $\text{CDCl}_3$ )  $\delta$  (ppm) 135.7, 127.8, 124.4, 122.0, 120.8, 119.9, 111.2, 102.4.

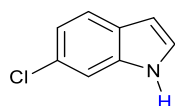

**6-Chloro-1H-indole (2c).**<sup>22</sup> White solid (131.8 mg, 87%). M. p. = 88.5–89.6 °C, reported: 86–88 °C.  $^1\text{H}$  NMR (400 MHz,  $\text{CDCl}_3$ )  $\delta$  (ppm) 8.09 (br s, 1H), 7.57 (dd,  $J = 8.4, 0.8$  Hz, 1H), 7.37 (dd,  $J = 1.8, 0.9$  Hz, 1H), 7.18 (dd,  $J = 3.3, 2.4$  Hz, 1H), 7.13 (dd,  $J = 8.4, 1.8$  Hz, 1H), 6.56–6.55 (m, 1H).  $^{13}\text{C}$  NMR (101 MHz,  $\text{CDCl}_3$ )  $\delta$  (ppm) 136.2, 127.9, 126.5, 125.0, 121.7, 120.7, 111.1, 102.9.

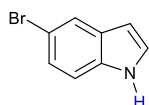

**5-Bromo-1H-indole (2d).**<sup>22</sup> White solid (186.2 mg, 95%). M. p. = 89.9–91.2 °C, reported: 88.6–89.6 °C.  $^1\text{H}$  NMR (400 MHz,  $\text{CDCl}_3$ )  $\delta$  (ppm) 8.13 (br s, 1H), 7.81 (d,  $J = 1.9$  Hz, 1H), 7.31 (dd,  $J = 8.6, 1.9$  Hz, 1H), 7.25–7.23 (m, 1H), 7.19–7.18 (m, 1H), 6.53–6.51 (m, 1H).  $^{13}\text{C}$  NMR (101 MHz,  $\text{CDCl}_3$ )  $\delta$  (ppm) 134.5, 129.7, 125.6, 124.9, 123.2, 113.1, 112.6, 102.3.

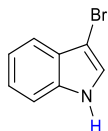

**3-Bromo-1H-indole (2e).**<sup>23</sup> White solid (170.5 mg, 87%). M. p. = 65.3–66.0 °C (dec.), reported: 65–66 °C (dec.). <sup>1</sup>H NMR (400 MHz, CDCl<sub>3</sub>)  $\delta$  (ppm) 8.19 (br s, 1H), 7.60 (dd,  $J$  = 7.3, 1.5 Hz, 1H), 7.39–7.37 (m, 1H), 7.28–7.26 (m, 1H), 7.25–7.20 (m, 2H). <sup>13</sup>C NMR (101 MHz, CDCl<sub>3</sub>)  $\delta$  (ppm) 135.4, 126.9, 123.5, 123.2, 120.8, 119.2, 111.5, 91.7.

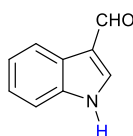

**1H-indole-3-carbaldehyde (2f).**<sup>24</sup> White solid (136.4 mg, 94%). M. p. = 195.1–196.2 °C, reported: 196–198 °C. <sup>1</sup>H NMR (400 MHz, DMSO-*d*<sub>6</sub>)  $\delta$  (ppm) 12.14 (br s, 1H), 9.94 (s, 1H), 8.29 (d,  $J$  = 2.9 Hz, 1H), 8.12–8.10 (m, 1H), 7.53–7.51 (m, 1H), 7.28–7.20 (m, 2H). <sup>13</sup>C NMR (101 MHz, DMSO-*d*<sub>6</sub>)  $\delta$  (ppm) 185.0, 138.5, 137.1, 124.1, 123.5, 122.1, 120.9, 118.2, 112.4.

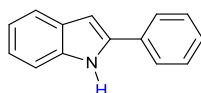

**2-Phenyl-1H-indole (2g).**<sup>25</sup> White solid (181.6 mg, 94%). M. p. = 189.7–190.5 °C, reported: 190–191 °C. <sup>1</sup>H NMR (400 MHz, CDCl<sub>3</sub>)  $\delta$  (ppm) 8.32 (br s, 1H), 7.69–7.66 (m, 3H), 7.48–7.45 (m, 2H), 7.42 (dt,  $J$  = 8.0, 1.0 Hz, 1H), 7.37–7.33 (m, 1H), 7.24 (ddd,  $J$  = 8.2, 7.1, 1.3 Hz, 1H), 7.17 (ddd,  $J$  = 8.0, 7.0, 1.1 Hz, 1H), 6.86 (dd,  $J$  = 2.2, 0.9 Hz, 1H). <sup>13</sup>C NMR (101 MHz, CDCl<sub>3</sub>)  $\delta$  (ppm) 138.0, 136.9, 132.5, 129.4, 129.1, 127.8, 125.3, 122.5, 120.8, 120.4, 111.0, 100.1.

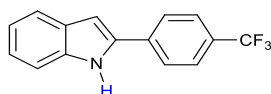

**2-(4-(Trifluoromethyl)phenyl)-1H-indole (2h).**<sup>25</sup> White solid (235.0 mg, 90%). M. p.

= 232.4–235.4 °C, reported: 234–236 °C. <sup>1</sup>H NMR (400 MHz, DMSO-*d*<sub>6</sub>) δ (ppm) 11.73 (br s, 1H), 8.07 (d, *J* = 8.2 Hz, 2H), 7.80 (d, *J* = 8.2 Hz, 2H), 7.57 (d, *J* = 7.9 Hz, 1H), 7.44 (d, *J* = 8.1 Hz, 1H), 7.15 (ddd, *J* = 8.2, 6.9, 1.2 Hz, 1H), 7.07 (d, *J* = 2.2 Hz, 1H), 7.03 (t, *J* = 7.5 Hz, 1H). <sup>13</sup>C NMR (101 MHz, DMSO-*d*<sub>6</sub>) δ (ppm) 137.5, 136.1 (q, *J* = 1.0 Hz), 135.8, 128.4, 127.4, 125.8 (q, *J* = 3.8 Hz), 125.3, 124.3 (q, *J* = 272.7 Hz), 122.4, 120.5, 119.7, 111.5, 100.7.

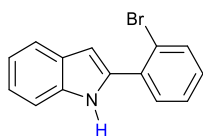

**2-(2-Bromophenyl)-1H-indole (2i).**<sup>26</sup> Yellow solid (234.0 mg, 86%). M. p. = 73.5–74.9 °C, reported: 75–77 °C. <sup>1</sup>H NMR (400 MHz, CDCl<sub>3</sub>) δ (ppm) 8.60 (br s, 1H), 7.81–7.77 (m, 2H), 7.64 (dd, *J* = 7.8, 1.8 Hz, 1H), 7.49–7.47 (m, 1H), 7.44 (td, *J* = 7.6, 1.3 Hz, 1H), 7.35 (ddd, *J* = 8.2, 7.1, 1.3 Hz, 1H), 7.30–7.26 (m, 2H), 6.94 (dd, *J* = 7.6, 0.9 Hz, 1H). <sup>13</sup>C NMR (101 MHz, CDCl<sub>3</sub>) δ (ppm) 136.3, 136.2, 134.0, 133.4, 131.4, 129.2, 128.2, 127.7, 122.6, 121.4, 120.9, 120.2, 111.2, 103.7.

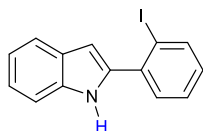

**2-(2-Iodophenyl)-1H-indole (2j).**<sup>27</sup> Yellow oil (261.7 mg, 82%). <sup>1</sup>H NMR (400 MHz, CDCl<sub>3</sub>) δ (ppm) 8.24 (br s, 1H), 8.09 (dd, *J* = 8.0, 1.2 Hz, 1H), 7.82 (dd, *J* = 7.8, 1.1 Hz, 1H), 7.52 (dd, *J* = 7.7, 1.9 Hz, 1H), 7.49–7.44 (m, 2H), 7.38 (ddd, *J* = 8.1, 7.0, 1.3 Hz, 1H), 7.30 (ddd, *J* = 8.1, 7.0, 1.2 Hz, 1H), 7.13 (ddd, *J* = 7.9, 7.2, 1.9 Hz, 1H), 6.87 (dd, *J* = 2.3, 0.9 Hz, 1H). <sup>13</sup>C NMR (101 MHz, CDCl<sub>3</sub>) δ (ppm) 140.3, 138.7, 137.8, 136.0, 131.1, 129.6, 128.3, 128.2, 122.5, 120.9, 120.2, 111.2, 103.5, 97.2.

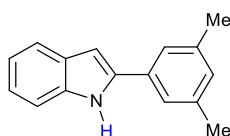

**2-(3,5-Dimethylphenyl)-1H-indole (2k).**<sup>28</sup> White solid (183.7 mg, 83%). M. p. =

146.3–146.8 °C, reported: 146–147 °C. <sup>1</sup>H NMR (400 MHz, CDCl<sub>3</sub>) δ (ppm) 8.32 (br s, 1H), 7.64 (d, *J* = 7.8 Hz, 1H), 7.41–7.39 (m, 1H), 7.31 (s, 2H), 7.20 (ddd, *J* = 8.1, 7.1, 1.3 Hz, 1H), 7.14 (ddd, *J* = 8.0, 7.0, 1.1 Hz, 1H), 7.00–6.99 (m, 1H), 6.82 (m, 1H), 2.40 (s, 6H). <sup>13</sup>C NMR (101 MHz, CDCl<sub>3</sub>) δ (ppm) 138.7, 138.3, 136.8, 132.4, 129.6, 129.4, 123.2, 122.3, 120.7, 120.3, 111.0, 99.9, 21.5.

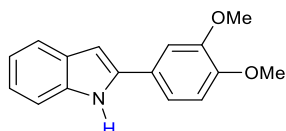

**2-(3,4-Dimethoxyphenyl)-1H-indole (2l).**<sup>29</sup> White solid (210.2 mg, 83%). M. p. = 186.9–190.4 °C, reported: 182–184 °C. <sup>1</sup>H NMR (400 MHz, CDCl<sub>3</sub>) δ (ppm) 8.39 (br s, 1H), 7.64 (dd, *J* = 7.7, 1.2 Hz, 1H), 7.37 (dd, *J* = 7.9, 1.0 Hz, 1H), 7.22–7.12 (m, 4H), 6.91 (d, *J* = 8.2 Hz, 1H), 6.75 (dd, *J* = 2.2, 0.9 Hz, 1H), 3.95 (s, 3H), 3.91 (s, 3H); <sup>13</sup>C NMR (101 MHz, CDCl<sub>3</sub>) δ (ppm) 149.5, 149.0, 138.2, 136.8, 129.5, 125.7, 122.1, 120.5, 120.3, 117.7, 111.7, 110.9, 109.0, 99.1, 56.0 (2C).

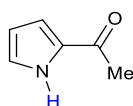

**1-(1H-pyrrol-2-yl)ethan-1-one (2m).**<sup>30</sup> White solid (106.9 mg, 98%). M. p. = 88.1–90.3 °C, reported: 88–89 °C. <sup>1</sup>H NMR (400 MHz, CDCl<sub>3</sub>) δ (ppm) 10.65 (br s, 1H), 7.07 (dt, *J* = 3.8, 1.8 Hz, 1H), 6.94–6.92 (m, 1H), 6.26 (dt, *J* = 4.4, 2.5 Hz, 1H), 2.45 (s, 3H). <sup>13</sup>C NMR (101 MHz, CDCl<sub>3</sub>) δ (ppm) 188.5, 132.2, 125.5, 117.4, 110.5, 25.5.

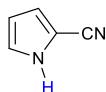

**1H-pyrrole-2-carbonitrile (2n).**<sup>31</sup> Colorless oil (90.2 mg, 98%). <sup>1</sup>H NMR (400 MHz, CDCl<sub>3</sub>) δ (ppm) 9.87 (br s, 1H), 6.96 (td, *J* = 2.8, 1.4 Hz, 1H), 6.88 (ddd, *J* = 3.9, 2.4, 1.4 Hz, 1H), 6.26 (dt, *J* = 3.8, 2.6 Hz, 1H). <sup>13</sup>C NMR (101 MHz, CDCl<sub>3</sub>) δ (ppm) 124.1, 120.3, 115.0, 109.9, 100.2.

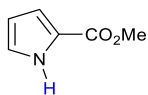

**Methyl 1H-pyrrole-2-carboxylate (2o).**<sup>30</sup> White solid (117.6 mg, 94%). M. p. = 72.6–73.5 °C, reported: 74–77 °C. <sup>1</sup>H NMR (400 MHz, CDCl<sub>3</sub>)  $\delta$  (ppm) 9.89 (br s, 1H), 6.83–6.80 (m, 2H), 6.11 (dt,  $J$  = 3.8, 2.5 Hz, 1H), 3.71 (s, 3H). <sup>13</sup>C NMR (101 MHz, CDCl<sub>3</sub>)  $\delta$  (ppm) 162.1, 123.5, 122.4, 115.5, 110.3, 51.4.

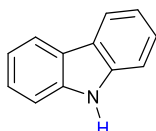

**9H-carbazole (2p).**<sup>32</sup> Ethyl acetate was used to dissolve the compound. White solid (150.4 mg, 90%). M. p. = 223.2–245.6 °C, reported: 245–246 °C. <sup>1</sup>H NMR (400 MHz, DMSO-*d*<sub>6</sub>)  $\delta$  (ppm) 11.26 (br s, 1H), 8.11 (d,  $J$  = 7.8 Hz, 2H), 7.50 (dd,  $J$  = 8.1, 0.9 Hz, 2H), 7.39 (ddd,  $J$  = 8.2, 7.0, 1.2 Hz, 2H), 7.16 (ddd,  $J$  = 8.0, 7.1, 1.0 Hz, 2H). <sup>13</sup>C NMR (101 MHz, DMSO-*d*<sub>6</sub>)  $\delta$  (ppm) 139.7, 125.5, 122.4, 120.1, 118.5, 110.9.

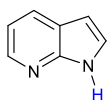

**1H-pyrrolo[2,3-*b*]pyridine (2q).**<sup>21</sup> White solid (93.3 mg, 79%). M. p. = 105.9–106.8 °C, reported: 105–107 °C. <sup>1</sup>H NMR (400 MHz, CDCl<sub>3</sub>)  $\delta$  (ppm) 12.59 (br s, 1H), 8.42 (dd,  $J$  = 4.8, 1.6 Hz, 1H), 8.03 (dd,  $J$  = 7.9, 1.6 Hz, 1H), 7.47 (d,  $J$  = 3.5 Hz, 1H), 7.14 (dd,  $J$  = 7.8, 4.8 Hz, 1H), 6.56 (d,  $J$  = 3.5 Hz, 1H). <sup>13</sup>C NMR (101 MHz, CDCl<sub>3</sub>)  $\delta$  (ppm) 149.0, 142.0, 129.1, 125.7, 120.8, 115.6, 100.4.

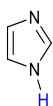

**1H-imidazole (2r).**<sup>21</sup> White solid (54.4 mg, 79%). M. p. = 89.3–90.0 °C, reported: 88–90 °C. <sup>1</sup>H NMR (400 MHz, CDCl<sub>3</sub>)  $\delta$  (ppm) 13.42–13.36 (m, 1H), 7.75 (d,  $J$  = 1.1 Hz, 1H), 7.14 (m, 2H). <sup>13</sup>C NMR (101 MHz, CDCl<sub>3</sub>)  $\delta$  (ppm) 135.3, 121.9 (2C).

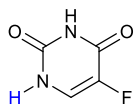

**5-Fluoropyrimidine-2,4(1H,3H)-dione (2s).**<sup>33</sup> After ball-milling, water is used to dissolve the compound. When the filtrate was concentrated, a white solid precipitates out from the solution, and another filtration afforded the product. White solid (105.3 mg, 81%). M. p. = 280.5–281.8 °C (dec.), reported: 280–281 °C (dec.). <sup>1</sup>H NMR (400 MHz, DMSO-*d*<sub>6</sub>)  $\delta$  (ppm) 11.50 (s, 1H), 10.71 (s, 1H), 7.73 (d, *J* = 6.0 Hz, 1H). <sup>13</sup>C NMR (101 MHz, DMSO-*d*<sub>6</sub>)  $\delta$  (ppm) 158.1 (d, *J* = 25.9 Hz), 150.2, 140.0 (d, *J* = 227.1 Hz), 126.4 (d, *J* = 31.8 Hz).

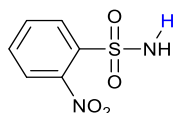

**2-Nitrobenzenesulfonamide (4a).**<sup>34</sup> Ethyl acetate was used to dissolve the compound. White solid (182.0 mg, 90%). M. p. = 190.8–191.5 °C, reported: 190–192 °C. <sup>1</sup>H NMR (400 MHz, DMSO-*d*<sub>6</sub>)  $\delta$  (ppm) 8.07 (dd, *J* = 7.8, 1.6 Hz, 1H), 7.95 (dd, *J* = 7.8, 1.6 Hz, 1H), 7.89–7.80 (m, 4H); <sup>13</sup>C NMR (101 MHz, DMSO-*d*<sub>6</sub>)  $\delta$  (ppm) 147.2, 135.9, 133.5, 132.7, 129.0, 124.3.

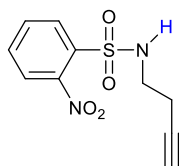

**N-(But-3-yn-1-yl)-2-nitrobenzenesulfonamide(4b).**<sup>35</sup> White solid (241.5 mg, 95%). M. p. = 104.6–106.7 °C. <sup>1</sup>H NMR (400 MHz, CDCl<sub>3</sub>)  $\delta$  (ppm) 8.11–8.09 (m, 1H), 7.86–7.84 (m, 1H), 7.75–7.73 (m, 2H), 5.75 (t, *J* = 6.2 Hz, 1H), 3.25 (q, *J* = 6.5 Hz, 2H), 2.40 (td, *J* = 6.6, 2.6 Hz, 2H), 1.97 (t, *J* = 2.7 Hz, 1H). <sup>13</sup>C NMR (101 MHz, CDCl<sub>3</sub>)  $\delta$  (ppm) 147.9, 133.9, 133.6, 133.1, 130.9, 125.5, 80.0, 71.1, 42.4, 19.8.

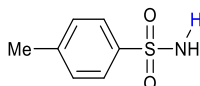

**4-Methylbenzenesulfonamide (4c).**<sup>36</sup> White solid (148.95 mg, 87%). M. p. = 135.9–138.8 °C, reported: 138–139 °C. <sup>1</sup>H NMR (400 MHz, DMSO-*d*6)  $\delta$  (ppm) 7.71 (dd,  $J$  = 8.0, 1.8 Hz, 2H), 7.36 (d,  $J$  = 8.0 Hz, 2H), 7.27 (br s, 2H), 2.37 (s, 3H). <sup>13</sup>C NMR (101 MHz, DMSO-*d*6)  $\delta$  (ppm) 141.8, 141.5, 129.3, 125.6, 20.9.

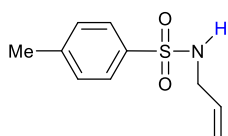

***N*-Allyl-4-methylbenzenesulfonamide(4d).**<sup>24</sup> White solid (209 mg, 99%). M. p. = 63.7–64.5 °C, reported: 64–65 °C. <sup>1</sup>H NMR (400 MHz, CDCl<sub>3</sub>)  $\delta$  (ppm) 7.75 (d,  $J$  = 8.2 Hz, 2H), 7.28 (d,  $J$  = 8.2 Hz, 2H), 5.69 (ddt,  $J$  = 17.1, 10.2, 5.8 Hz, 1H), 5.14 (dd,  $J$  = 17.1, 1.5 Hz, 1H), 5.06–5.03 (m, 2H), 3.56–3.53 (m, 2H), 2.40 (s, 3H). <sup>13</sup>C NMR (101 MHz, CDCl<sub>3</sub>)  $\delta$  (ppm) 143.5, 136.9, 133.0, 129.8, 127.2, 117.6, 45.8, 21.6.

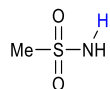

**Methanesulfonamide(4e).**<sup>37</sup> White solid (74.1 mg, 78%). M. p. = 87.3–88.4 °C, reported: 88.5–91.0 °C. <sup>1</sup>H NMR (400 MHz, DMSO-*d*6)  $\delta$  (ppm) 6.78 (br s, 2H), 2.90 (s, 3H). <sup>13</sup>C NMR (101 MHz, DMSO-*d*6)  $\delta$  (ppm) 43.3.

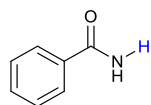

**Benzamide (4f).**<sup>38</sup> White solid (92.0 mg, 76%). M. p. = 128.6–130.4 °C, reported: 132–133 °C. <sup>1</sup>H NMR (400 MHz, CDCl<sub>3</sub>)  $\delta$  (ppm) 7.83–7.80 (m, 2H), 7.55–7.51 (m, 1H), 7.46–7.42 (m, 2H), 6.21 (br s, 2H). <sup>13</sup>C NMR (101 MHz, CDCl<sub>3</sub>)  $\delta$  (ppm) 169.9, 133.5, 132.1, 128.7, 127.5.

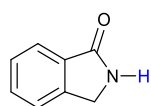

**Isoindolin-1-one (4g).**<sup>39</sup> White solid (103.8 mg, 78%). M. p. = 149.1–150.8 °C,



reported: 151–152 °C.  $^1\text{H}$  NMR (400 MHz,  $\text{CDCl}_3$ )  $\delta$  (ppm) 7.89–7.87 (m, 1H), 7.63 (br s, 1H), 7.57 (td,  $J = 7.4, 1.2$  Hz, 1H), 7.50–7.47 (m, 2H), 4.48 (s, 2H).  $^{13}\text{C}$  NMR (101 MHz,  $\text{CDCl}_3$ )  $\delta$  (ppm) 172.4, 143.8, 132.3, 131.8, 128.1, 123.8, 123.3, 45.9.

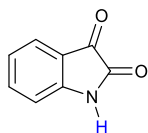

**Indoline-2,3-dione (4h).**<sup>40</sup> Orange solid (110.3 mg, 75%). M. p. = 201.7–203.4 °C, reported: 200–202 °C.  $^1\text{H}$  NMR (400 MHz,  $\text{DMSO-}d_6$ )  $\delta$  (ppm) 11.03 (br s, 1H), 7.56 (td,  $J = 7.7, 1.4$  Hz, 1H), 7.49–7.46 (m, 1H), 7.04 (td,  $J = 7.5, 0.9$  Hz, 1H), 6.89 (dt,  $J = 7.9, 0.8$  Hz, 1H).  $^{13}\text{C}$  NMR (101 MHz,  $\text{DMSO-}d_6$ )  $\delta$  (ppm) 184.4, 159.4, 150.8, 138.4, 124.7, 122.8, 117.8, 112.3.

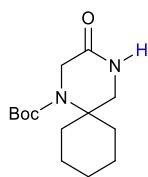

**tert-Butyl 3-oxo-1,4-diazaspiro[5.5]undecane-1-carboxylate (4i).** White solid (198.6 mg, 74%). M. p. = 301.9–303.2 °C.  $^1\text{H}$  NMR (400 MHz,  $\text{CDCl}_3$ )  $\delta$  (ppm) 7.06 (br s, 1H), 4.05 (s, 2H), 3.37 (d,  $J = 4.0$  Hz, 2H), 2.60 (td,  $J = 12.4, 4.3$  Hz, 2H), 1.67–1.59 (m, 3H), 1.55–1.51 (m, 2H), 1.45 (s, 9H), 1.31–1.26 (m, 3H).  $^{13}\text{C}$  NMR (101 MHz,  $\text{CDCl}_3$ )  $\delta$  (ppm) 171.8, 153.8, 80.6, 58.4, 47.6, 46.3, 30.5, 28.6, 25.0, 23.2. HRMS (ESI):  $m/z$   $[\text{M}+\text{H}]^+$  calcd for  $\text{C}_{14}\text{H}_{25}\text{N}_2\text{O}_3^+$ : 269.1860; found: 269.1864.

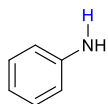

**Aniline (6a).**<sup>21</sup> Colourless oil (76.3 mg, 82%).  $^1\text{H}$  NMR (400 MHz,  $\text{CDCl}_3$ )  $\delta$  (ppm) 7.22–7.17 (m, 2H), 6.80 (tt,  $J = 7.4, 1.1$  Hz, 1H), 6.73–6.69 (m, 2H), 3.59 (br s, 2H).  $^{13}\text{C}$  NMR (101 MHz,  $\text{CDCl}_3$ )  $\delta$  (ppm) 146.4, 129.2, 118.3, 115.0.

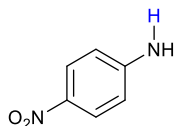

**4-Nitroaniline (6b).**<sup>21</sup> Yellow solid (110.5 mg, 80%). M. p. = 144.8–145.8 °C, reported: 147–148 °C. <sup>1</sup>H NMR (400 MHz, DMSO-*d*6)  $\delta$  (ppm) 7.94 (d,  $J$  = 9.1 Hz, 2H), 6.71 (br s, 2H), 6.60 (d,  $J$  = 9.1 Hz, 2H). <sup>13</sup>C NMR (101 MHz, DMSO-*d*6)  $\delta$  (ppm) 155.7, 135.7, 126.4, 112.4.

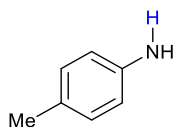

***p*-Toluidine (6c).**<sup>21</sup> Colourless oil (77mg, 72%); <sup>1</sup>H NMR (400 MHz, CDCl<sub>3</sub>)  $\delta$  (ppm) 7.02 (d,  $J$  = 8.2 Hz, 2H), 6.65 (d,  $J$  = 8.2 Hz, 2H), 3.55 (br s, 2H), 2.30 (s, 3H). <sup>13</sup>C NMR (101 MHz, CDCl<sub>3</sub>)  $\delta$  (ppm) 143.9, 129.8, 127.8, 115.3, 20.5.

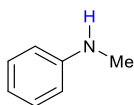

***N*-Methylaniline (6d).**<sup>41</sup> Colourless oil (92 mg, 86%). <sup>1</sup>H NMR (400 MHz, CDCl<sub>3</sub>)  $\delta$  (ppm) 7.25–7.19 (m, 2H), 6.76–6.72 (m, 1H), 6.66–6.64 (m, 2H), 3.67 (br s, 1H), 2.86 (s, 3H). <sup>13</sup>C NMR (101 MHz, CDCl<sub>3</sub>)  $\delta$  (ppm) 149.4, 129.2, 117.2, 112.4, 30.7.

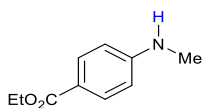

**Ethyl 4-(methylamino)benzoate (6e).**<sup>42</sup> White solid (144.6 mg, 84%). M. p. = 64.6–66.0 °C, reported: 57.1–57.8 °C. <sup>1</sup>H NMR (400 MHz, CDCl<sub>3</sub>)  $\delta$  (ppm) 7.87 (d,  $J$  = 8.8 Hz, 2H), 6.53 (d,  $J$  = 8.8 Hz, 2H), 4.30 (q,  $J$  = 7.1 Hz, 2H), 2.84 (s, 3H), 1.35 (t,  $J$  = 7.1 Hz, 3H). <sup>13</sup>C NMR (101 MHz, CDCl<sub>3</sub>)  $\delta$  (ppm) 167.1, 153.0, 131.5, 118.3, 111.0, 60.2, 30.1, 14.5.

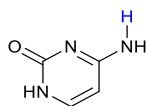

**4-Aminopyrimidin-2(1H)-one (6f).** Water is used to dissolve the compound. When the filtrate was concentrated, a white solid precipitates out from the solution, and another filtration afforded the product. White solid (93.3 mg, 84%). M. p. = 319.3–322.0 °C, reported: 305 °C.  $^1\text{H}$  NMR (400 MHz, DMSO-*d*<sub>6</sub>)  $\delta$  (ppm) 10.65 (br s, 1H), 7.34 (d,  $J$  = 7.0 Hz, 1H), 7.11 (br s, 2H), 5.59 (d,  $J$  = 7.0 Hz, 1H).  $^{13}\text{C}$  NMR (101 MHz, DMSO-*d*<sub>6</sub>)  $\delta$  (ppm) 166.8, 157.1, 142.7, 92.7.

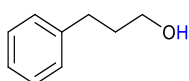

**3-Phenylpropan-1-ol (10a).**<sup>43</sup> Colourless oil (117 mg, 86%).  $^1\text{H}$  NMR (400 MHz, CDCl<sub>3</sub>)  $\delta$  (ppm) 7.28–7.24 (m, 2H), 7.18–7.14 (m, 3H), 3.61 (t,  $J$  = 6.5 Hz, 2H), 2.66 (dd,  $J$  = 8.8, 6.8 Hz, 2H), 2.46 (br s, 1H), 1.89–1.82 (m, 2H).  $^{13}\text{C}$  NMR (101 MHz, CDCl<sub>3</sub>)  $\delta$  (ppm) 141.9, 128.4 (2C), 125.8, 61.9, 34.1, 32.0.

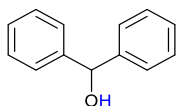

**Diphenylmethanol (10b).**<sup>44</sup> White solid (154.7 mg, 84%). M. p. = 68.7–69.3 °C, reported: 68 °C.  $^1\text{H}$  NMR (400 MHz, CDCl<sub>3</sub>)  $\delta$  (ppm) 7.32–7.26 (m, 8H), 7.23–7.19 (m, 2H), 5.76 (br s, 1H).  $^{13}\text{C}$  NMR (101 MHz, CDCl<sub>3</sub>)  $\delta$  (ppm) 143.9, 128.6, 127.6, 126.7, 76.3.

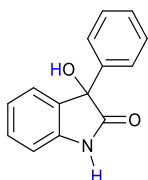

**3-Hydroxy-3-phenylindolin-2-one (10d).**<sup>23</sup> Ethyl acetate was used to dissolve the compound. White solid (168.9 mg, 75%). M. p. = 208.9–210 °C, reported: 213–214 °C.  $^1\text{H}$  NMR (400 MHz, DMSO-*d*<sub>6</sub>)  $\delta$  (ppm) 10.40 (br s, 1H), 7.33–7.23 (m, 6H), 7.09 (d,  $J$  = 7.4 Hz, 1H), 7.98–6.94 (m, 1H), 6.90 (d,  $J$  = 7.7 Hz, 1H), 6.62 (br s, 1H).  $^{13}\text{C}$  NMR

(101 MHz, DMSO-*d*<sub>6</sub>)  $\delta$  (ppm) 178.5, 141.9, 141.5, 133.8, 129.2, 128.1, 127.4, 125.4, 124.8, 122.0, 109.8, 77.3.

## 6. Reference

1. K. Kubota, K. Hayama, H. Iwamoto and H. Ito, *Angew. Chem., Int. Ed.*, 2015, **54**, 8809–8813.
2. S. Kirchberg, R. Fröhlich and A. Studer, *Angew. Chem., Int. Ed.*, 2009, **48**, 4235–4238.
3. S. Routier, V. Bénéteau, P. Kassis and J.-Y. Mérour, *Synthesis*, 2009, **2009**, 2447–2453.
4. A. Mambrini, D. Gori, R. Guillot, C. Kouklovsky and V. Alezra, *Chem. Commun.*, 2018, **54**, 12742–12745.
5. I. Kholod, O. Vallat, A. M. Buciumas, A. Neels and R. Neier, *Eur. J. Org. Chem.*, 2014, **2014**, 7865–7877.
6. V. Diep, J. J. Dannenberg and R. W. Franck, *J. Org. Chem.*, 2003, **68**, 7907–7910.
7. J. Wu, Z. Peng, T. Shen and Z. Q. Liu, *Adv. Synth. Catal.*, 2022, **364**, 2565–2570.
8. C. S. Nervig, S. T. Hatch and S. C. Owen, *ACS Med. Chem. Lett.*, 2022, **13**, 1769–1775.
9. L. Cox, Y. Zhu, P. J. Smith, K. E. Christensen, M. Sidera Portela and T. J. Donohoe, *Angew. Chem., Int. Ed.*, 2022, **61**.
10. K. Lin, J. Lan and T. Zhu, *Adv. Synth. Catal.*, 2022, **364**, 3466–3471.
11. J. Brom, A. Maruani, S. Turcaud, S. Lajnef, F. Peyrot, L. Micouin and E. Benedetti, *Org. Biomol. Chem.*, 2024, **22**, 59–64.
12. R.-J. Ma, J.-T. Sun, C.-H. Liu, L. Chen, C.-M. Si and B.-G. Wei, *Org. Biomol. Chem.*, 2020, **18**, 7139–7150.
13. D. J. Vyas, R. Fröhlich and M. Oestreich, *J. Org. Chem.*, 2010, **75**, 6720–6723.
14. S. Yoshida, K. Igawa and K. Tomooka, *J. Am. Chem. Soc.*, 2012, **134**, 19358–19361.
15. S. H. Lau, P. Yu, L. Chen, C. B. Madsen-Duggan, M. J. Williams and B. P. Carrow, *J. Am. Chem. Soc.*, 2020, **142**, 20030–20039.
16. Y. Huang, S. Dey, X. Zhang, F. Sönnichsen and P. Garner, *J. Am. Chem. Soc.*, 2004, **126**, 4626–4640.
17. T. Ikeda, Z. Zhang and Y. Motoyama, *Adv. Synth. Catal.*, 2018, **361**, 673–677.
18. Y. Basel and A. Hassner, *J. Org. Chem.*, 2000, **65**, 6368–6380.
19. Y. Hamashima, T. Suzuki, H. Takano, Y. Shimura and M. Sodeoka, *J. Am. Chem. Soc.*, 2005, **127**, 10164–10165.
20. E. Hasegawa, T. Tanaka, N. Izumiya, T. Kiuchi, Y. Ooe, H. Iwamoto, S. Takizawa and S. Murata, *J. Org. Chem.*, 2020, **85**, 4344–4353.

21. J. Wang, Y.-L. Liang and J. Qu, *Chem. Commun.*, 2009, 5144–5146.
22. Y. Shen, F. Chen, Z. Du, H. Zhang, J. Liu and N. Liu, *J. Org. Chem.*, 2024, **89**, 4530–4537.
23. M. Vayer, M. Pastor, C. Kofink and N. Maulide, *Org. Lett.*, 2021, **24**, 27–32.
24. C.-H. Liu, M. Xu, Q. Luo, Z. Wang, W. Tan, X. Zhao and X. Jia, *Tetrahedron*, 2024, **155**, 133904.
25. X. Guan, H. Zhu, Y. Zhao and T. G. Driver, *Eur. J. Org. Chem.*, 2019, 2020, 57–60.
26. S. Thavasvelan and K. Parthasarathy, *Org. Lett.*, 2020, **22**, 3810–3814.
27. L. Wu, G. Deng and Y. Liang, *Org. Biomol. Chem.*, 2017, **15**, 6808–6812.
28. S. D. Yang, C. L. Sun, Z. Fang, B. J. Li, Y. Z. Li and Z. J. Shi, *Angew. Chem. Int. Ed.*, 2008, **47**, 1473–1476.
29. X. Cheng, Y. He, S. Song, Y.-M. Lin and L. Gong, *Chem. Commun.*, 2023, **59**, 9513–9516.
30. C. A. Citron, P. Rabe and J. S. Dickschat, *J. Nat. Prod.*, 2012, **75**, 1765–1776.
31. X.-D. An and S. Yu, *Org. Lett.*, 2015, **17**, 5064–5067.
32. P. C. Gallage, M. G. McKee and S. P. Pitre, *Org. Lett.*, 2024, **26**, 1975–1979.
33. G.-q. Shi, W. Qian and M. Schlosser, *Tetrahedron*, 1996, **52**, 4403–4410.
34. M. A. H. Ismail, D. A. Abou El Ella, K. A. M. Abouzid and A. H. Mahmoud, *Bioorgan. Med. Chem.*, 2012, **20**, 2455–2478.
35. S. J. Gharpure, D. S. Vishwakarma and R. K. Patel, *Chem. Commun.*, 2019, **55**, 6858–6861.
36. D. Sang, B. Dong, K. Yu and J. Tian, *J. Org. Chem.*, 2024, **89**, 2306–2319.
37. S. Ahammed, A. Saha and B. C. Ranu, *J. Org. Chem.*, 2011, **76**, 7235–7239.
38. S. Yadav, N. U. D. Reshi, S. Pal and J. K. Bera, *Catal. Sci. Technol.*, 2021, **11**, 7018–7028.
39. C. Zhang, Y. Ding, Y. Gao, S. Li and G. Li, *Org. Lett.*, 2018, **20**, 2595–2598.
40. W. Chen, L.-Q. Wen, X.-B. Lu and H. Zhou, *Org. Biomol. Chem.*, 2024, **22**, 3073–3079.
41. J. Jiao, X.-R. Zhang, N.-H. Chang, J. Wang, J.-F. Wei, X.-Y. Shi and Z.-G. Chen, *J. Org. Chem.*, 2011, **76**, 1180–1183.
42. N. Sun, S. Wang, W. Mo, B. Hu, Z. Shen and X. Hu, *Tetrahedron*, 2010, **66**, 7142–7148.
43. S. Pattanaik and C. Gunanathan, *Chem. Commun.*, 2020, **56**, 7345–7348.
44. S. Guha, I. Kazi, D. Sathish and G. Sekar, *J. Org. Chem.*, 2022, **87**, 5424–5429.

## 7. $^1\text{H}$ and $^{13}\text{C}$ NMR Spectra of Unknown Substrates

$^1\text{H}$  NMR spectra of **1i** ( $\text{CDCl}_3$ , 400 MHz)

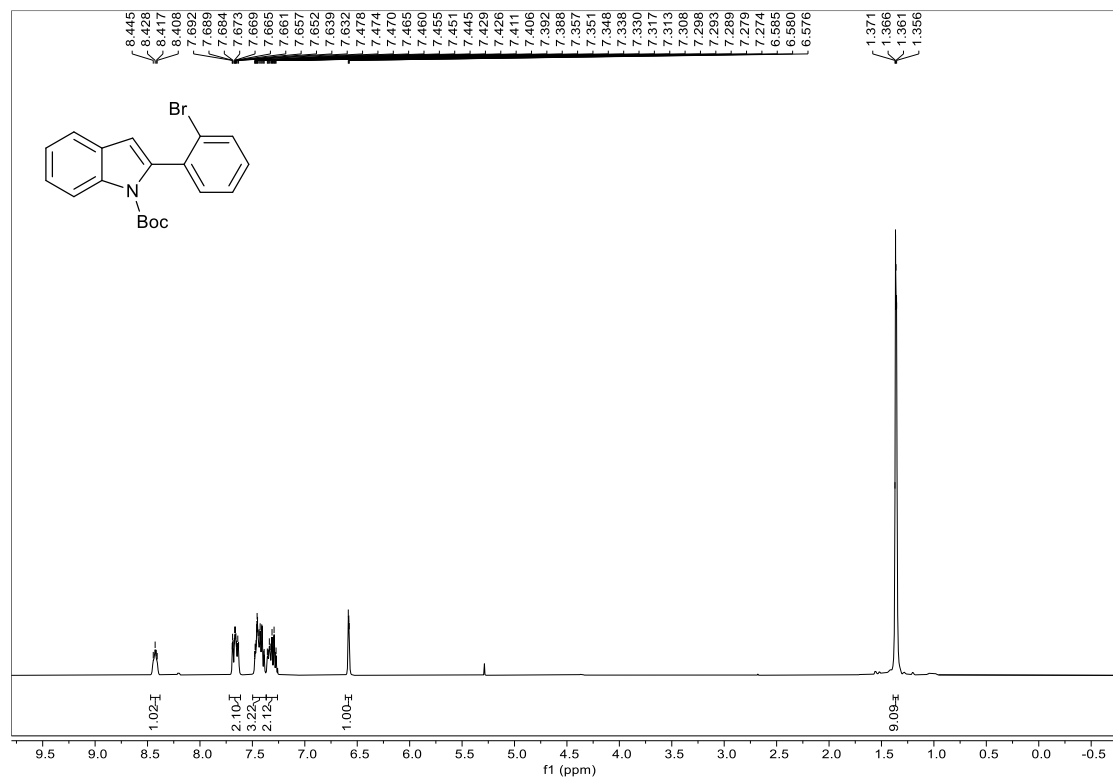

$^{13}\text{C}$  NMR spectra of **1i** ( $\text{CDCl}_3$ , 101 MHz)

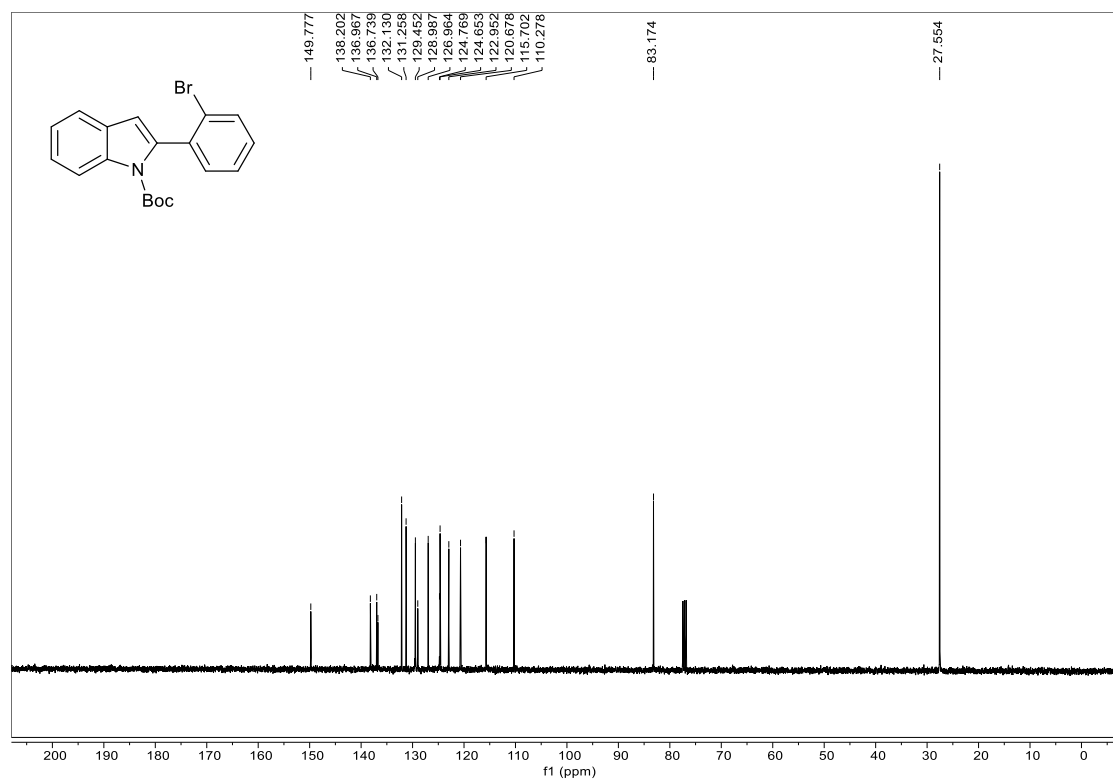

$^1\text{H}$  NMR spectra of **1j** ( $\text{CDCl}_3$ , 400 MHz)

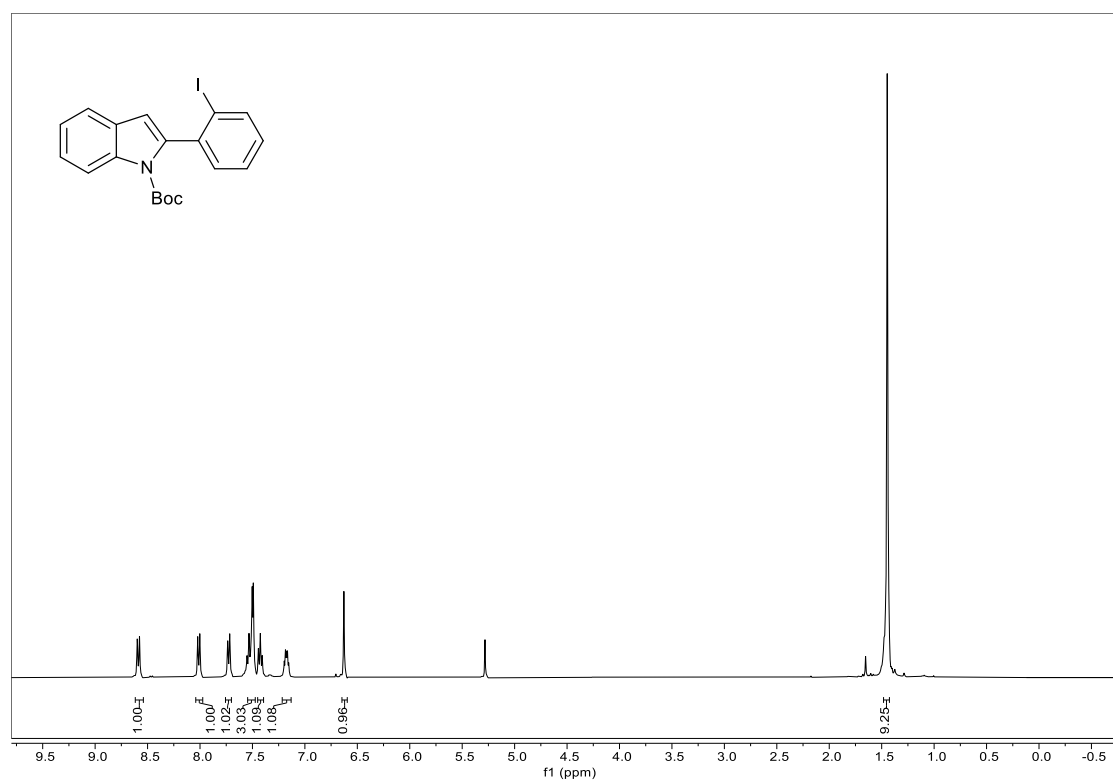

$^{13}\text{C}$  NMR spectra of **1j** ( $\text{CDCl}_3$ , 101 MHz)

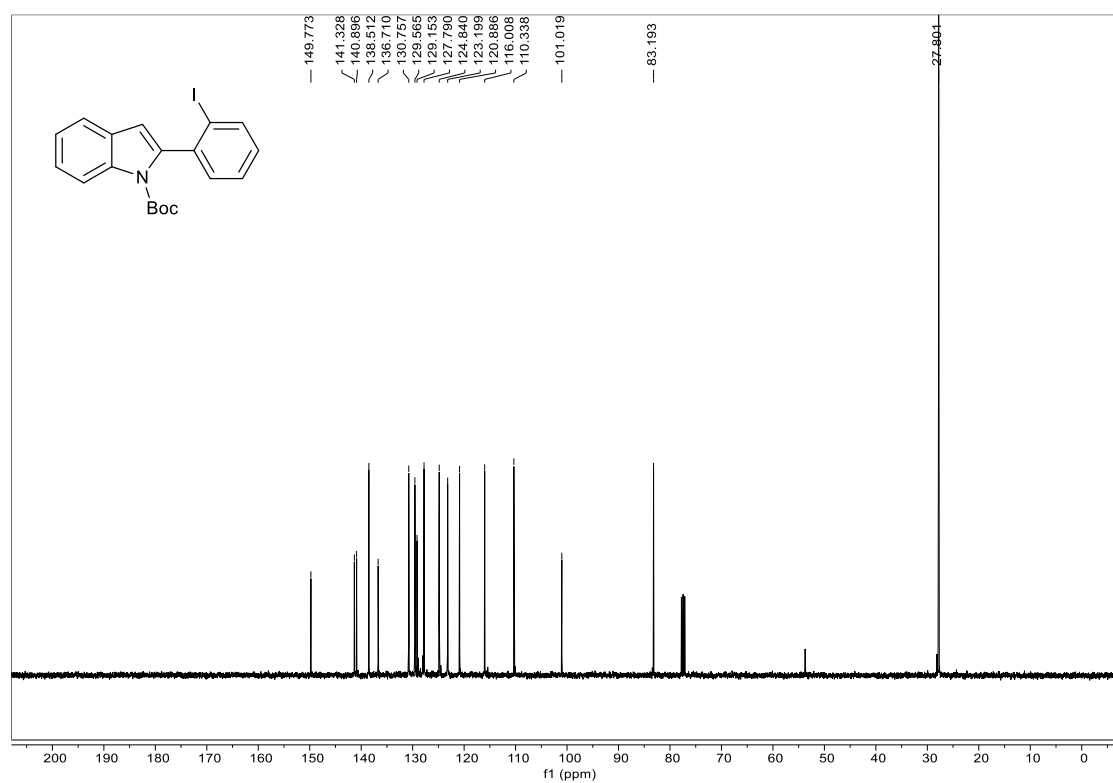



<sup>1</sup>H NMR spectra of **11** (CDCl<sub>3</sub>, 400 MHz)

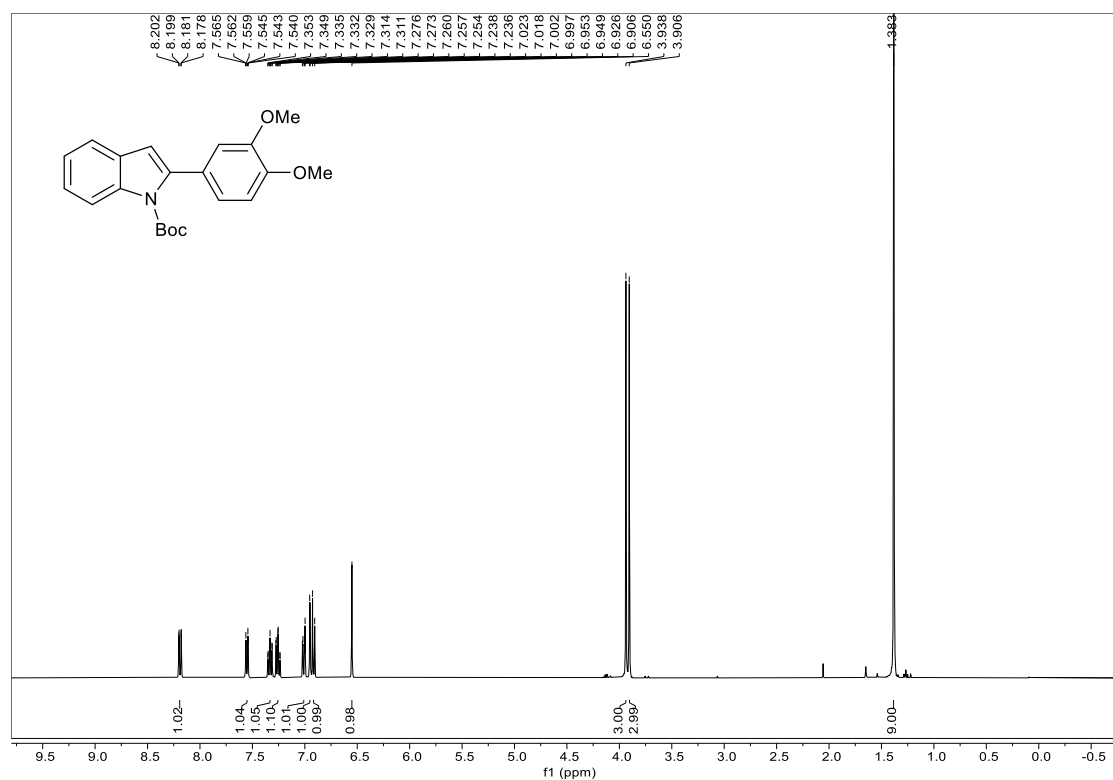

<sup>13</sup>C NMR spectra of **11** (CDCl<sub>3</sub>, 101 MHz)

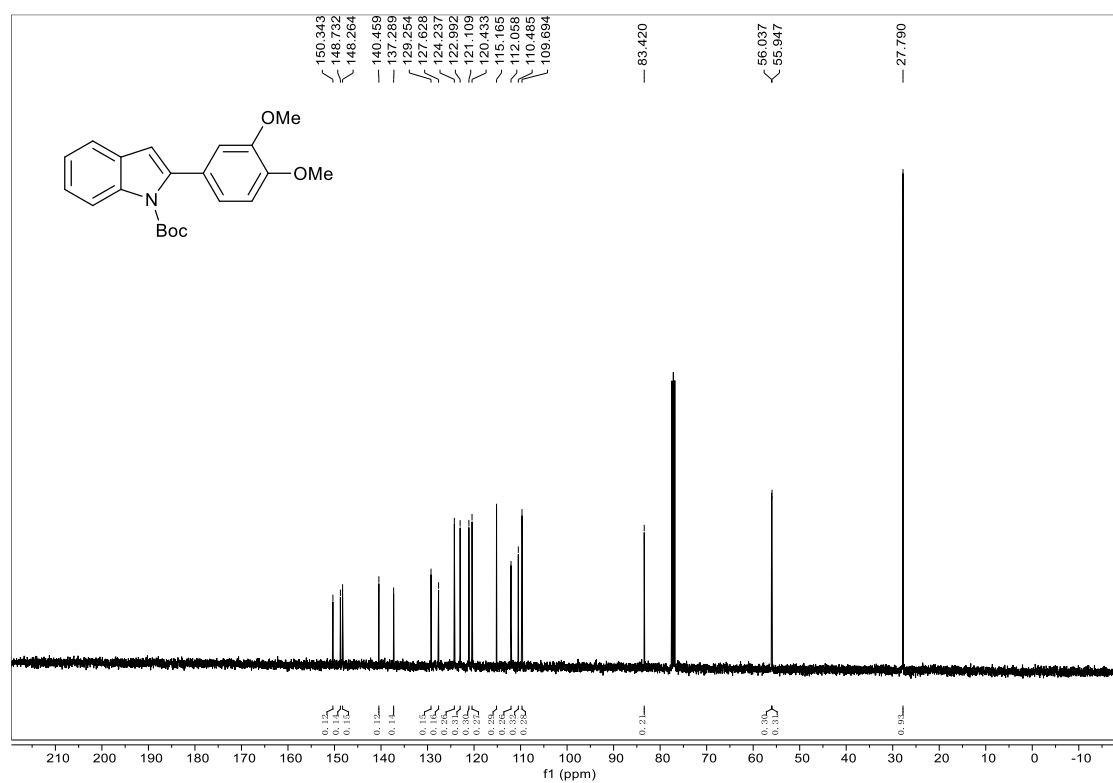

$^1\text{H}$  NMR spectra of **1n** ( $\text{CDCl}_3$ , 400 MHz)

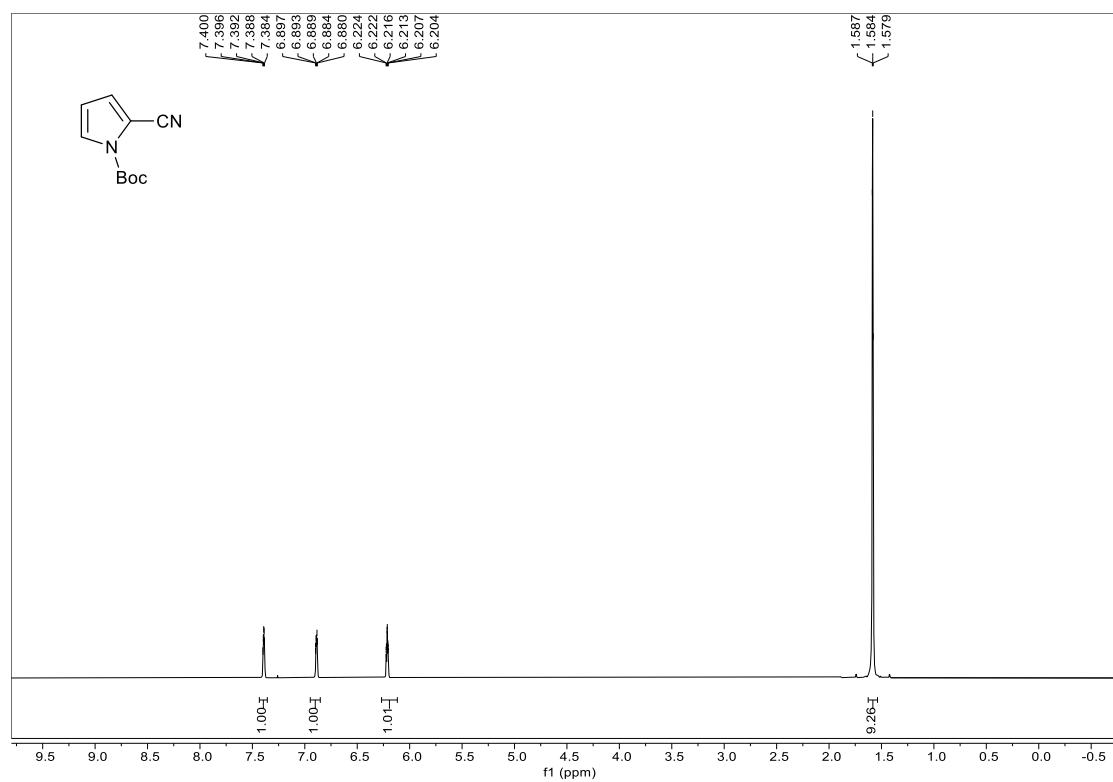

$^{13}\text{C}$  NMR spectra of **1n** ( $\text{CDCl}_3$ , 101 MHz)

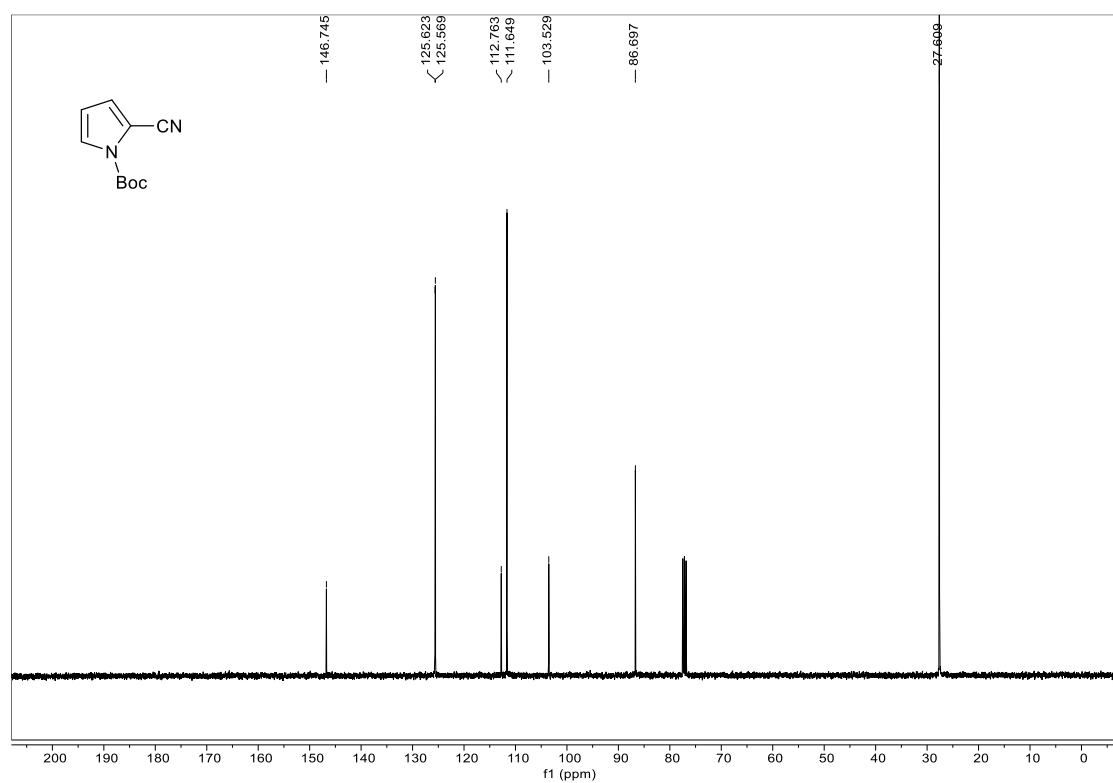

$^1\text{H}$  NMR spectra of **3b** ( $\text{CDCl}_3$ , 400 MHz)

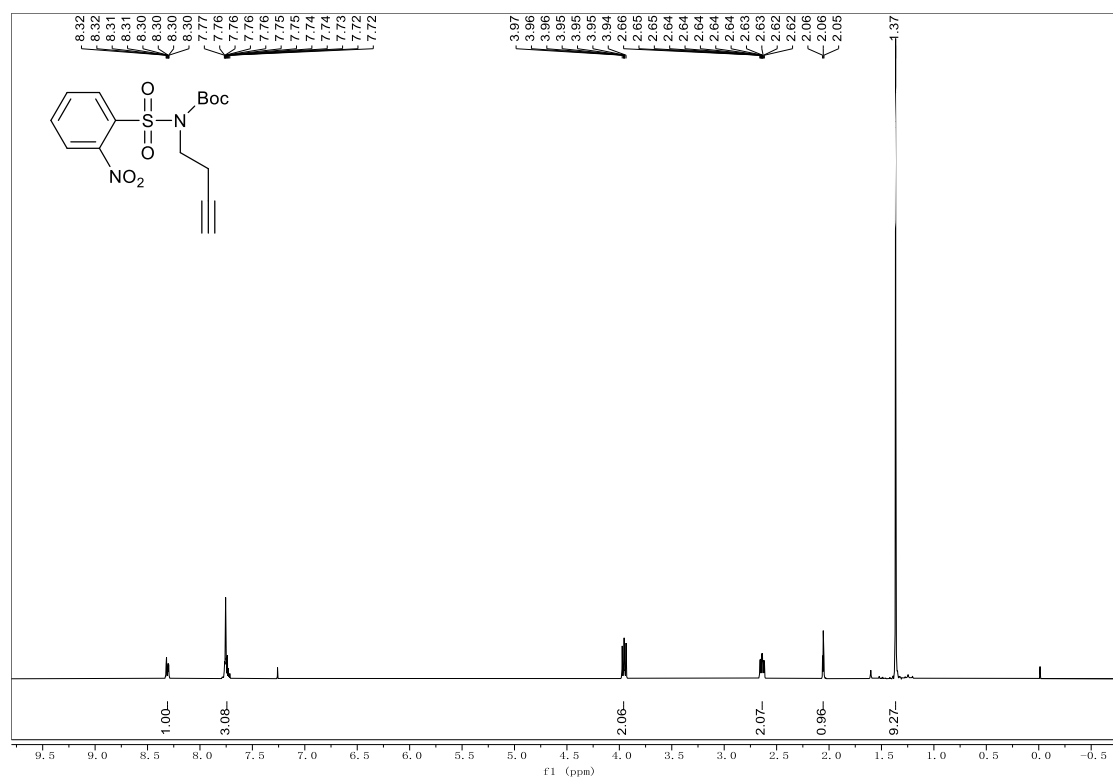

$^{13}\text{C}$  NMR spectra of **3b** ( $\text{CDCl}_3$ , 101 MHz)

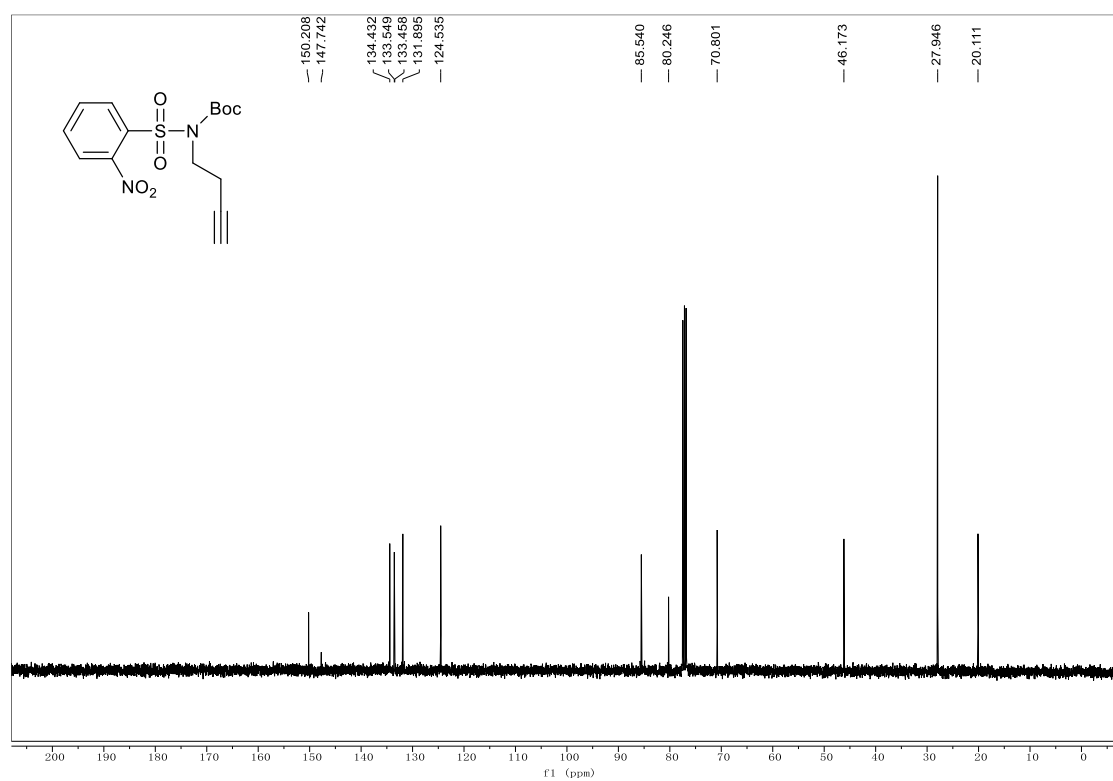

$^1\text{H}$  NMR spectra of **3i** ( $\text{CDCl}_3$ , 400 MHz)

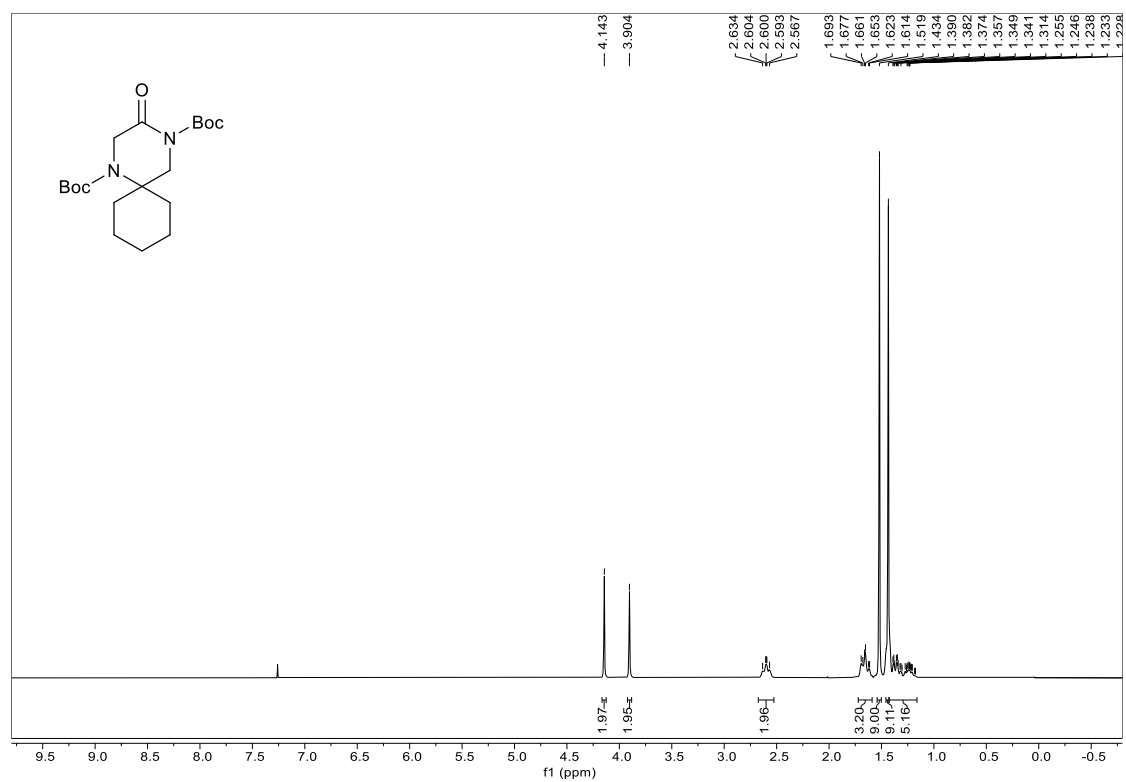

$^{13}\text{C}$  NMR spectra of **3i** ( $\text{CDCl}_3$ , 101 MHz)

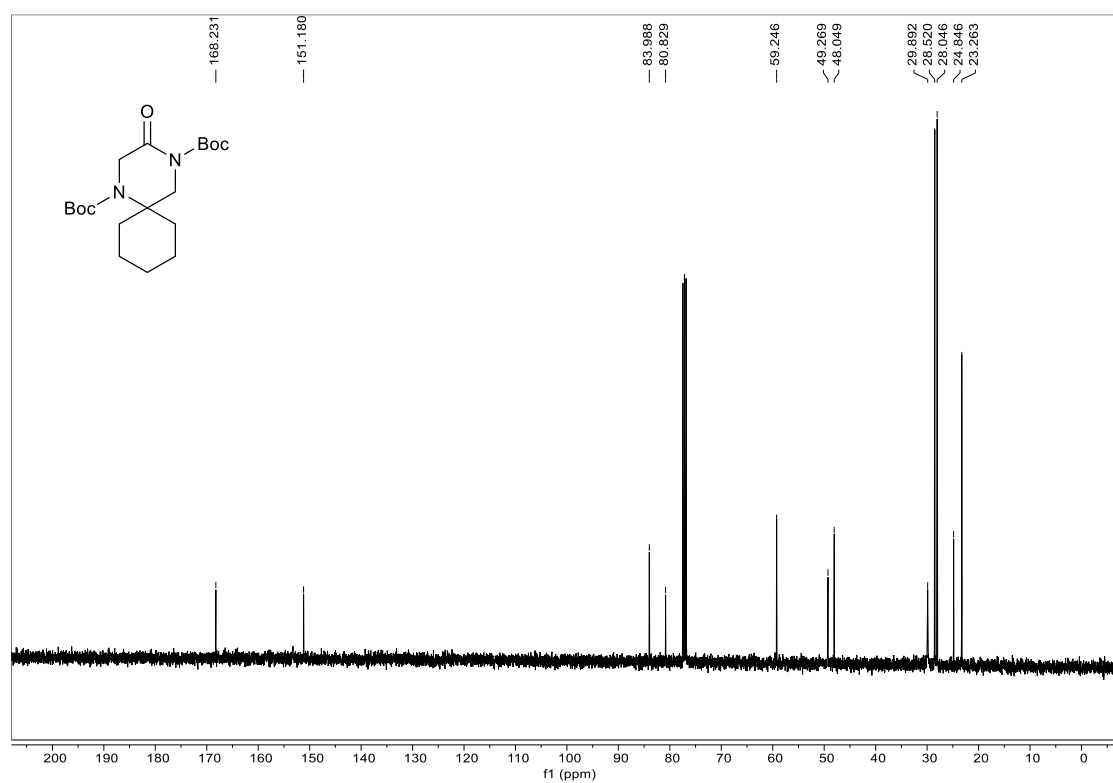

<sup>1</sup>H NMR spectra of **10c** (CDCl<sub>3</sub>, 400 MHz)

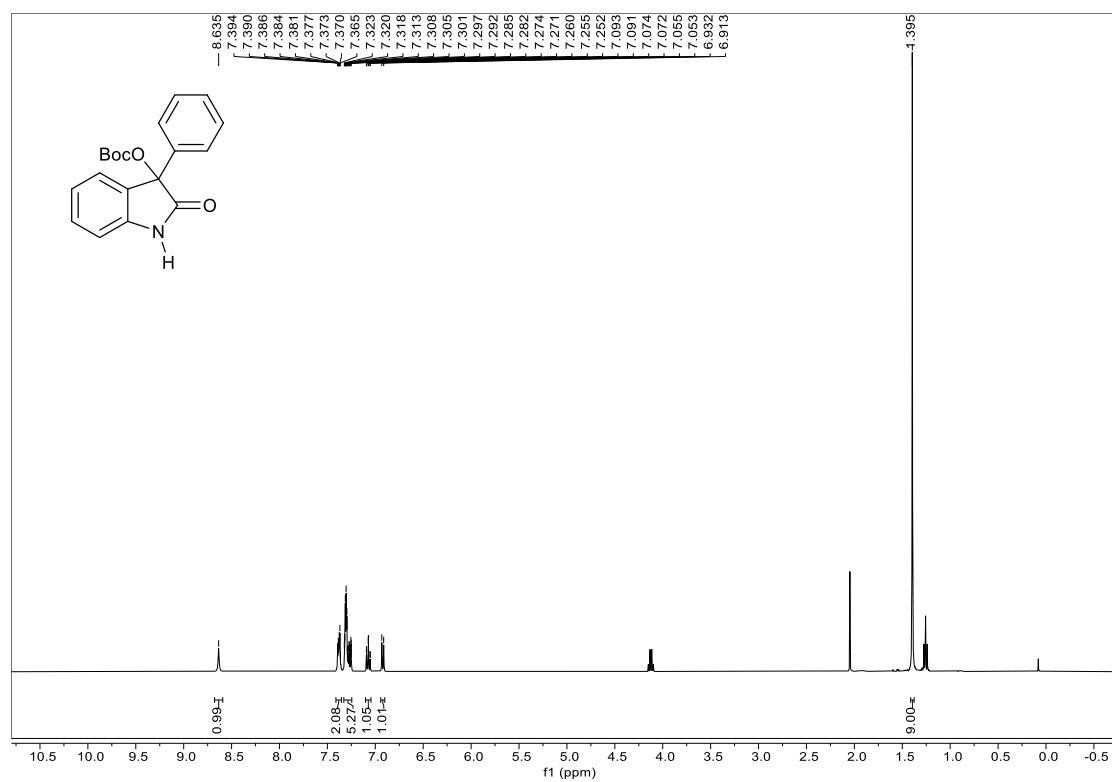

<sup>13</sup>C NMR spectra of **10c** (CDCl<sub>3</sub>, 101 MHz)

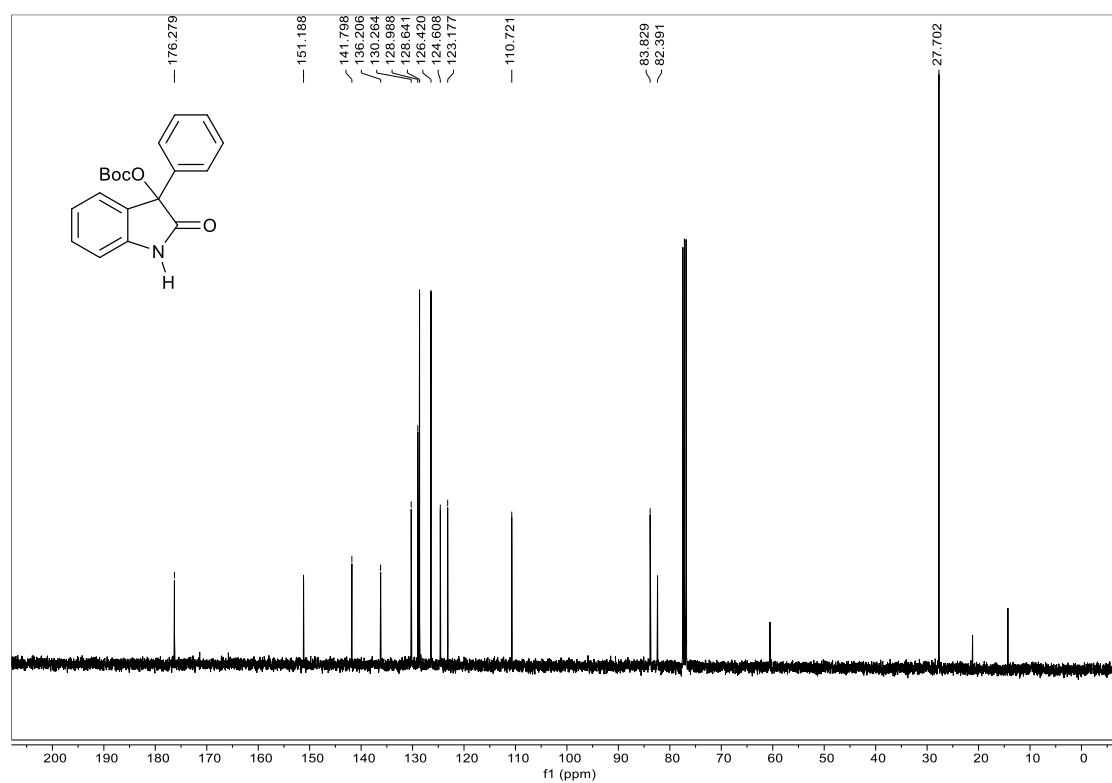

$^1\text{H}$  NMR spectra of **11a** ( $\text{CDCl}_3$ , 400 MHz)

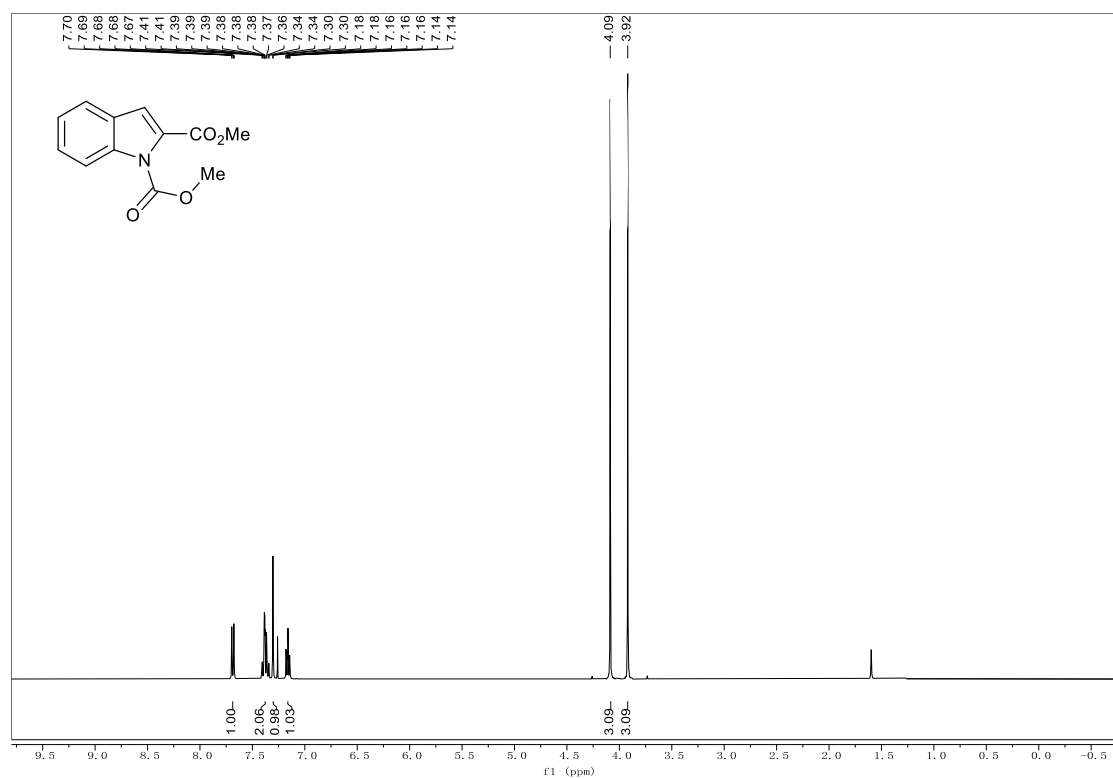

$^{13}\text{C}$  NMR spectra of **11a** ( $\text{CDCl}_3$ , 101 MHz)

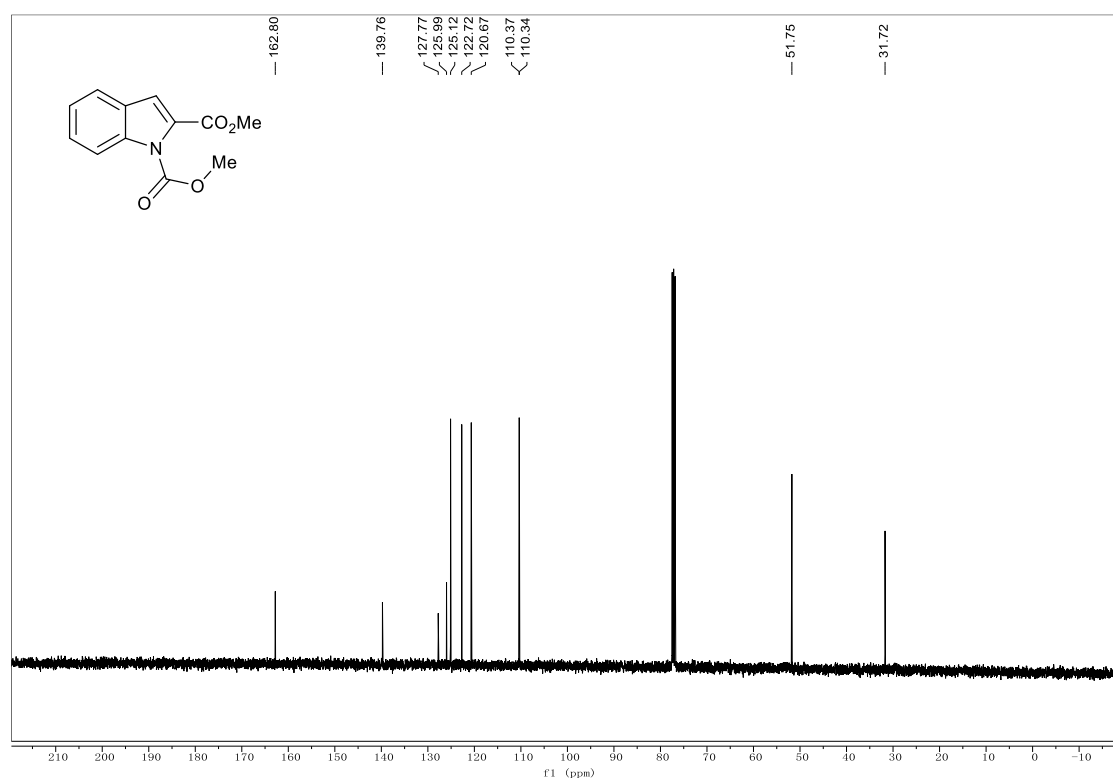

<sup>1</sup>H NMR spectra of **11b** (CDCl<sub>3</sub>, 400 MHz)

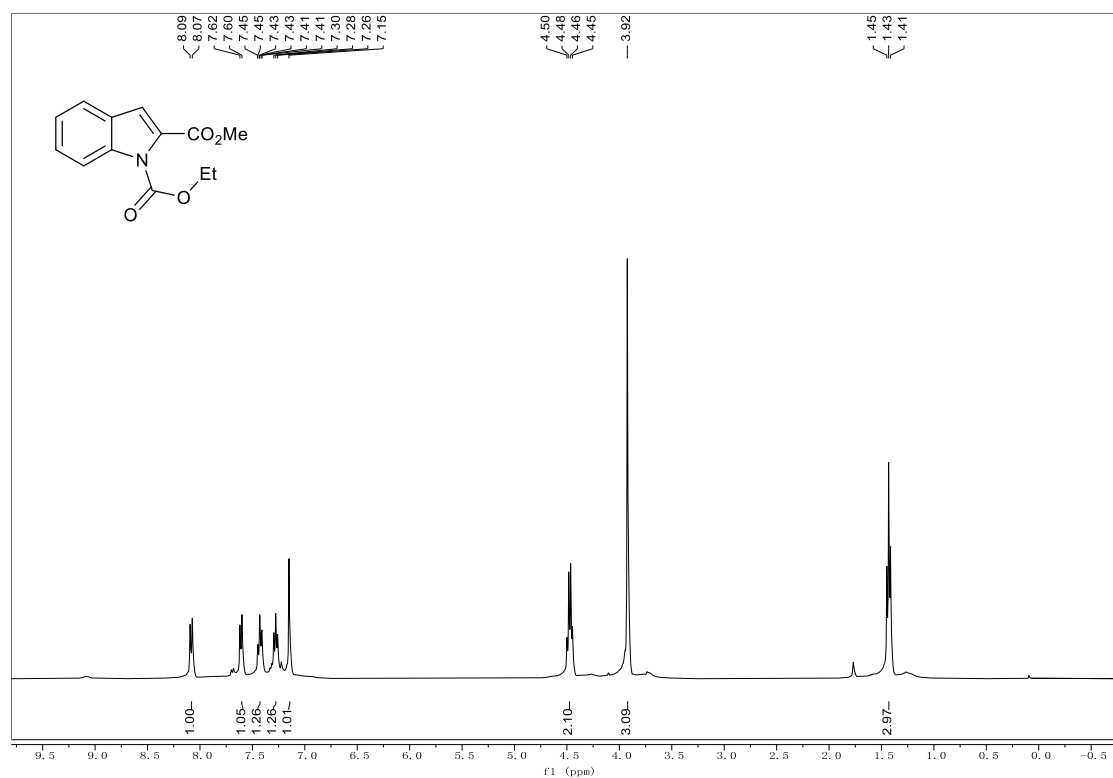

<sup>13</sup>C NMR spectra of **11b** (CDCl<sub>3</sub>, 101 MHz)

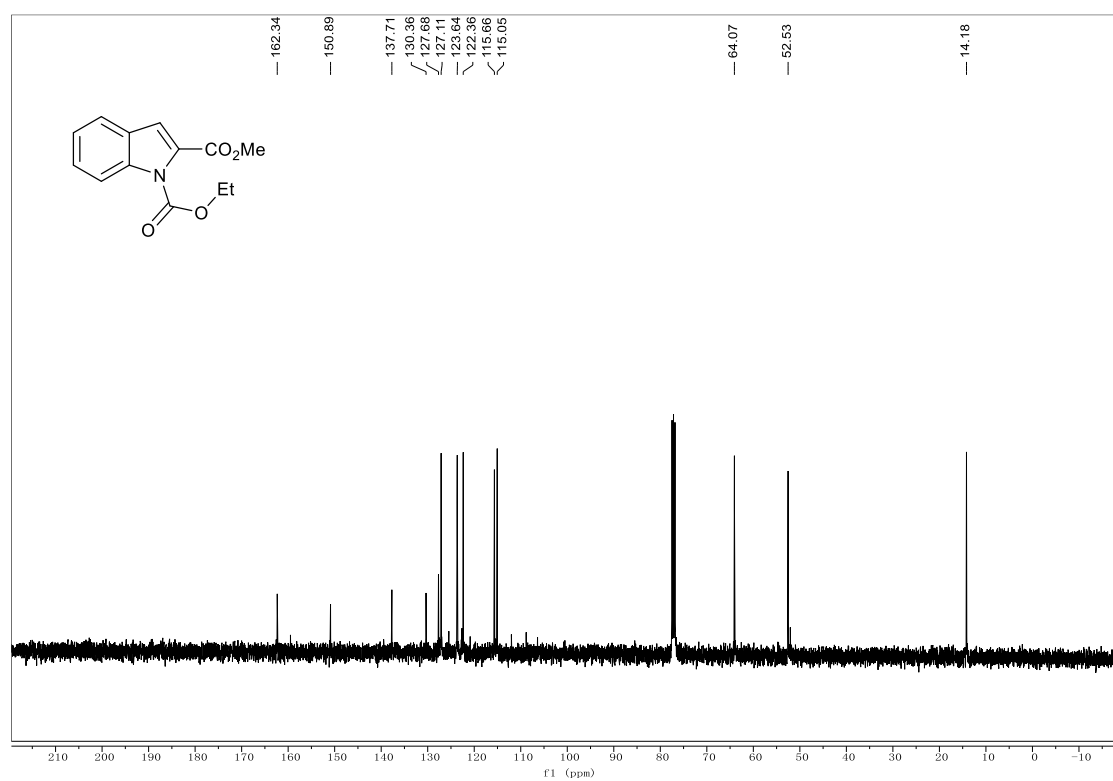

$^1\text{H}$  NMR spectra of **11c** ( $\text{CDCl}_3$ , 400 MHz)

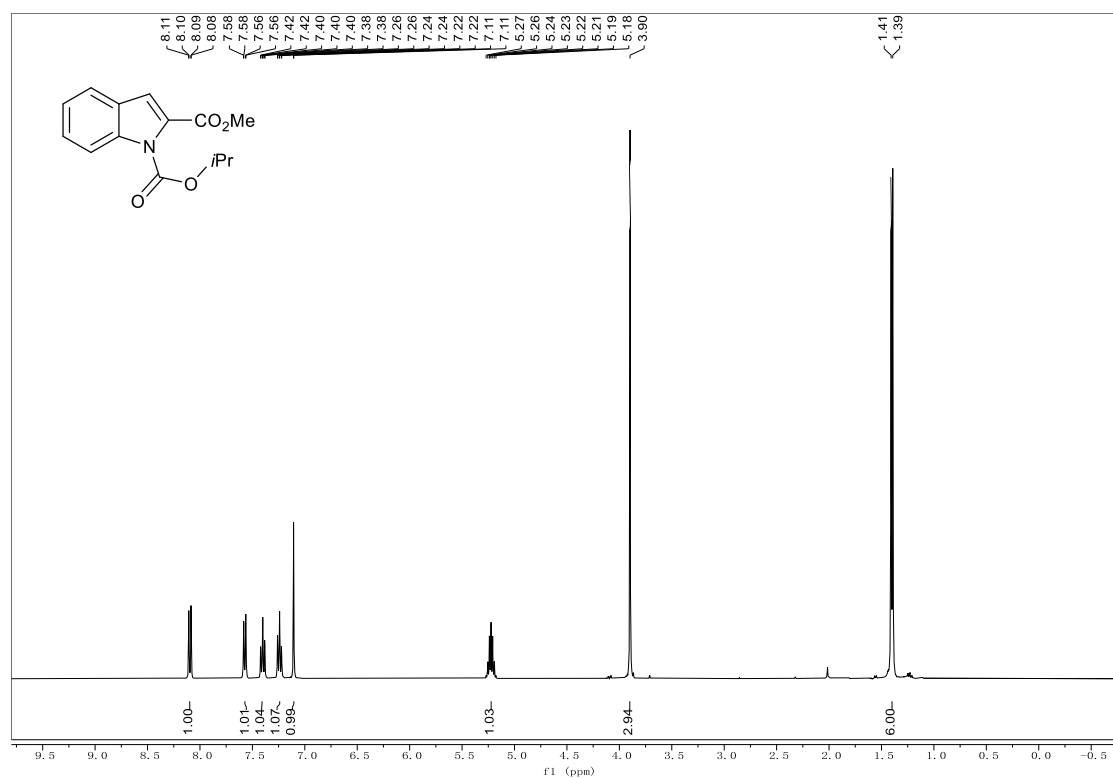

$^{13}\text{C}$  NMR spectra of **11c** ( $\text{CDCl}_3$ , 101 MHz)

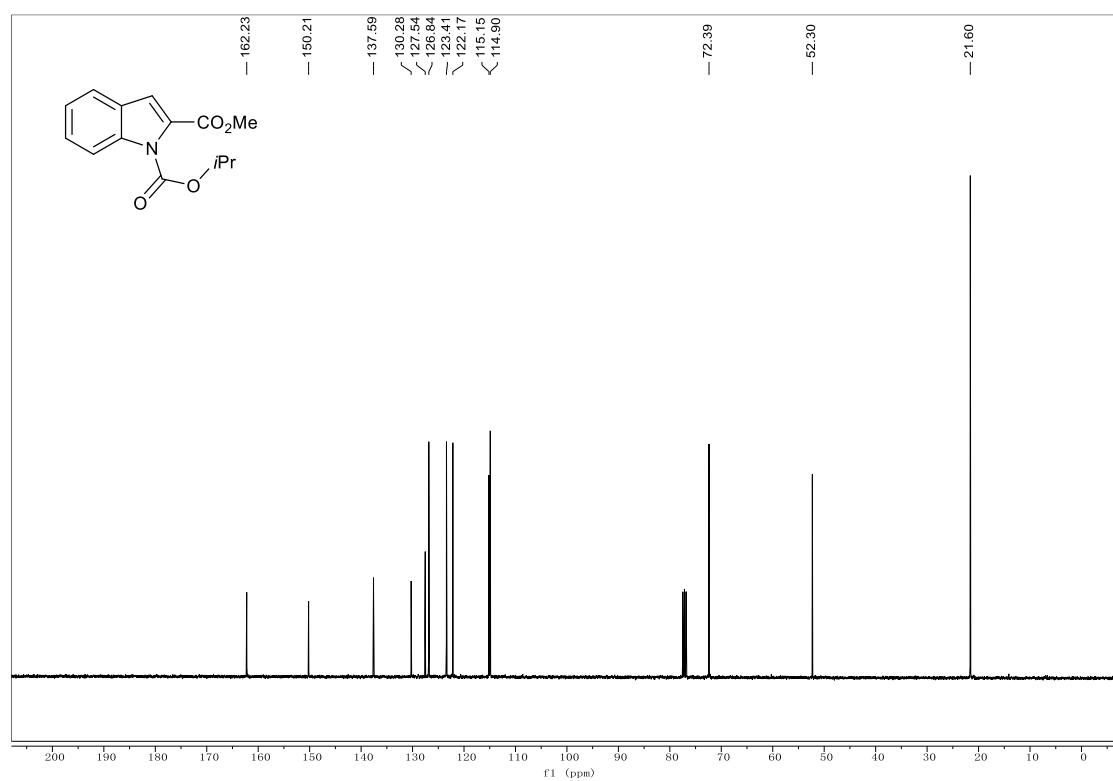



## 8. $^1\text{H}$ and $^{13}\text{C}$ NMR Spectra of Products

$^1\text{H}$  NMR spectra of **2a** ( $\text{CDCl}_3$ , 400 MHz)

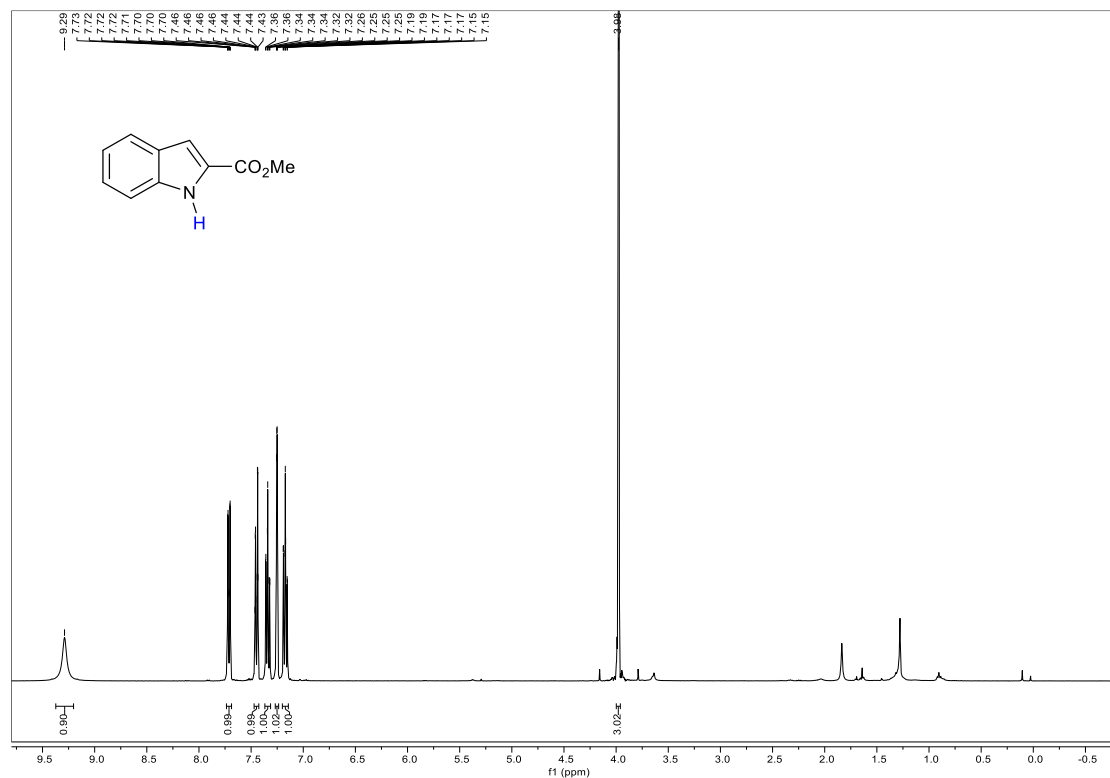

$^{13}\text{C}$  NMR spectra of **2a** ( $\text{CDCl}_3$ , 101 MHz)

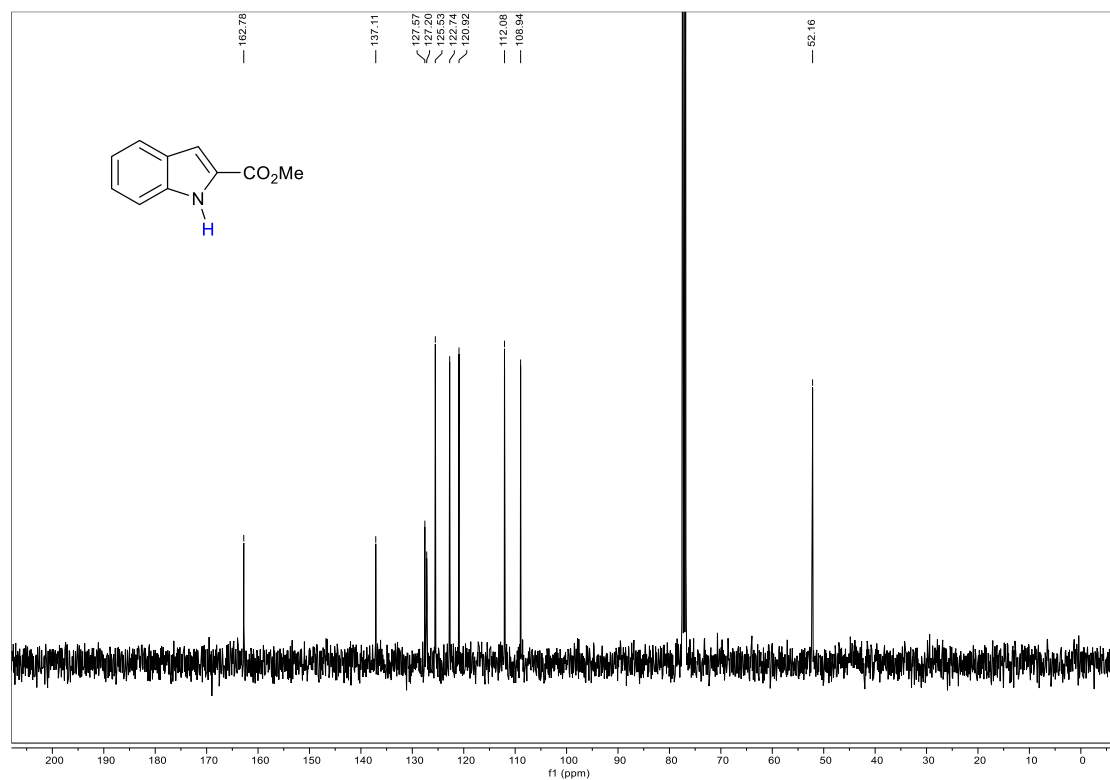

$^1\text{H}$  NMR spectra of **2b** ( $\text{CDCl}_3$ , 400 MHz)

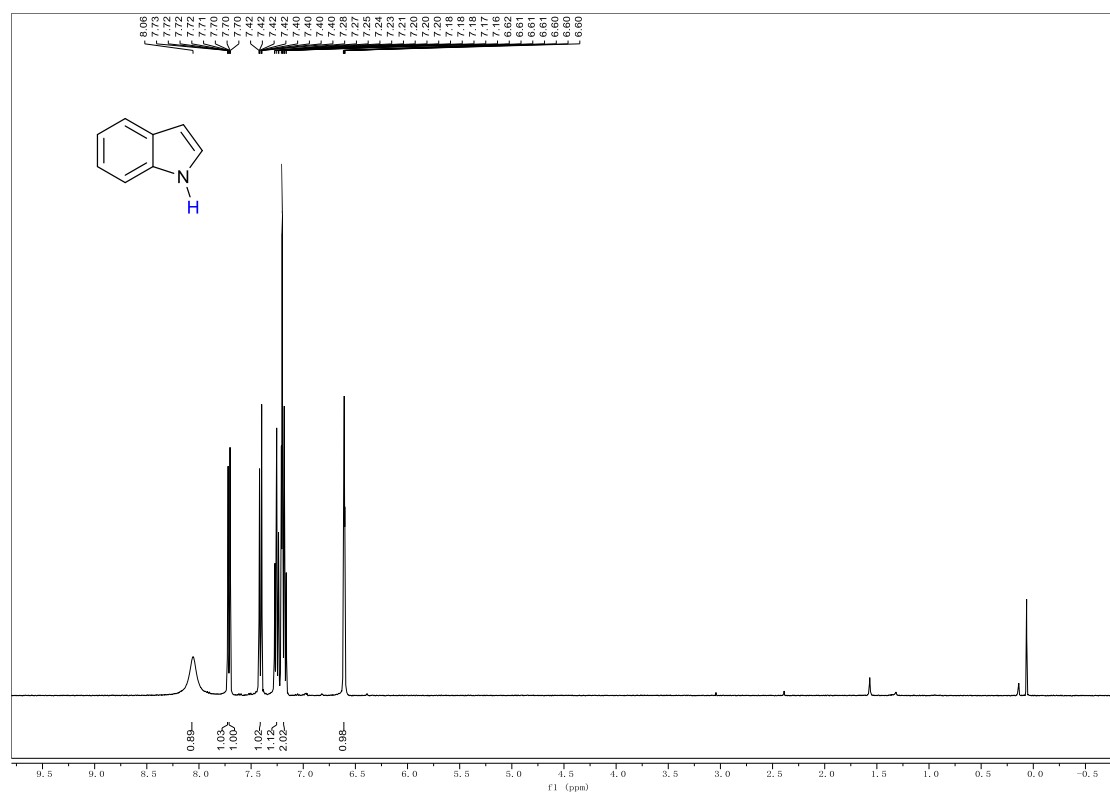

$^{13}\text{C}$  NMR spectra of **2b** ( $\text{CDCl}_3$ , 101 MHz)

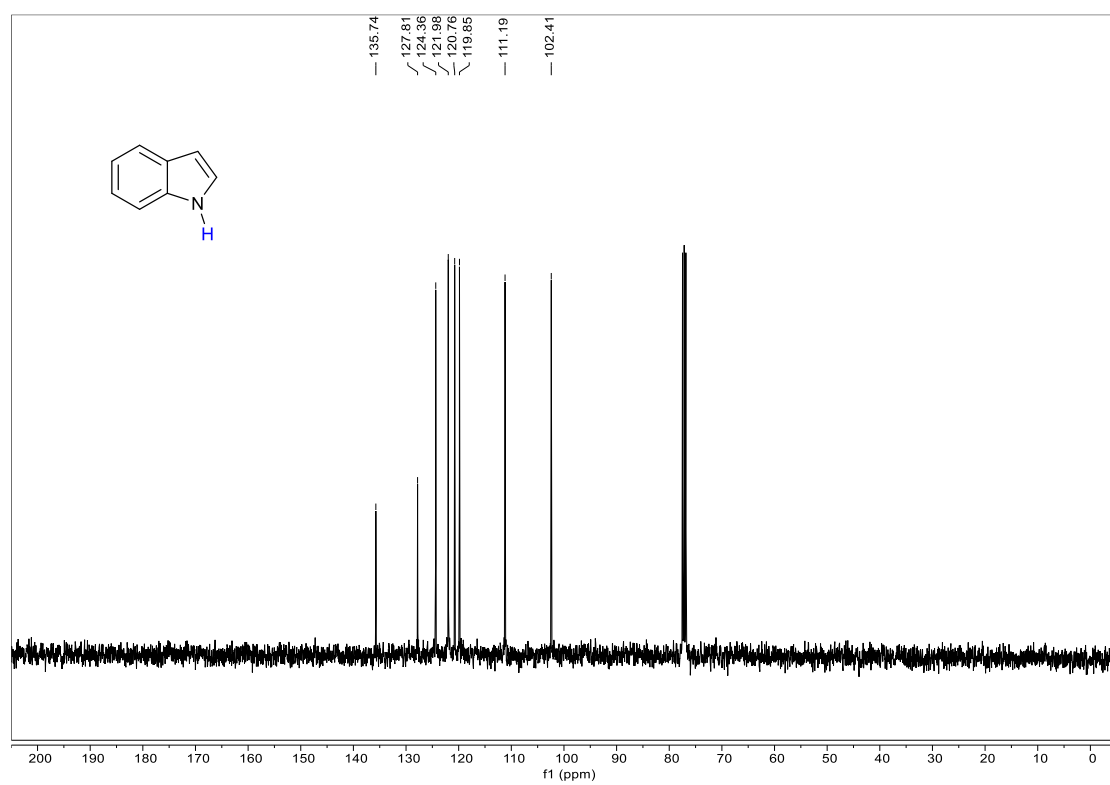

<sup>1</sup>H NMR spectra of **2c** (CDCl<sub>3</sub>, 400 MHz)

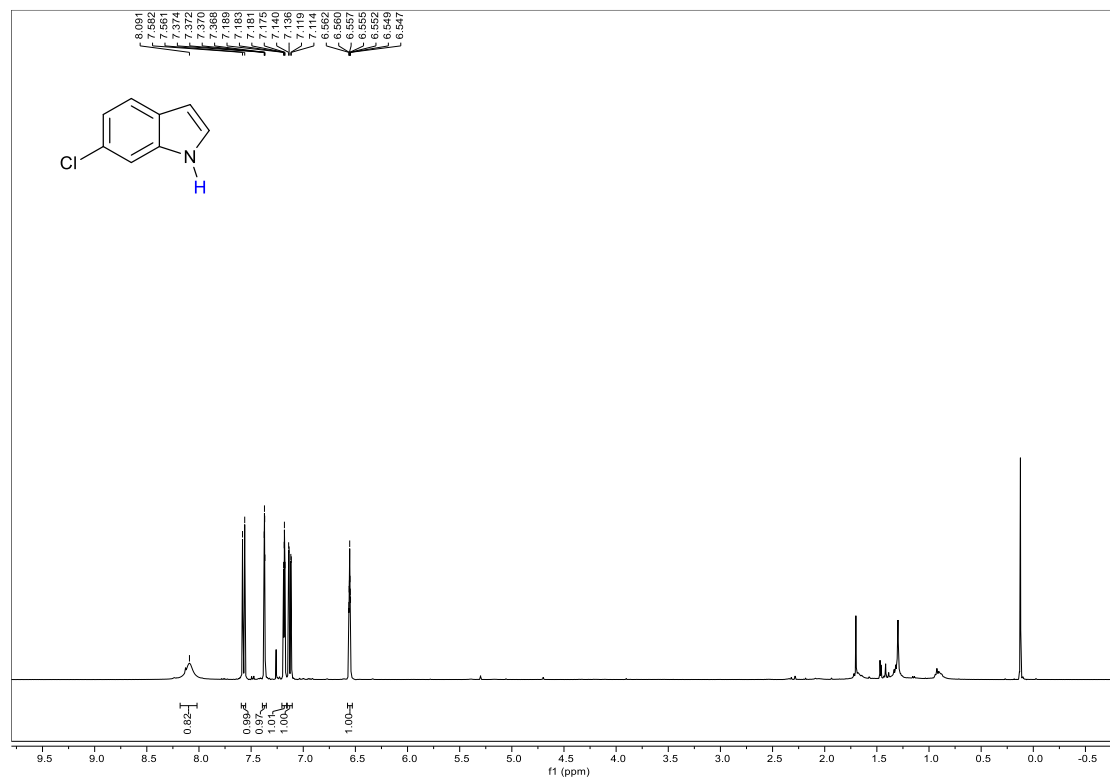

<sup>13</sup>C NMR spectra of **2c** (CDCl<sub>3</sub>, 101 MHz)

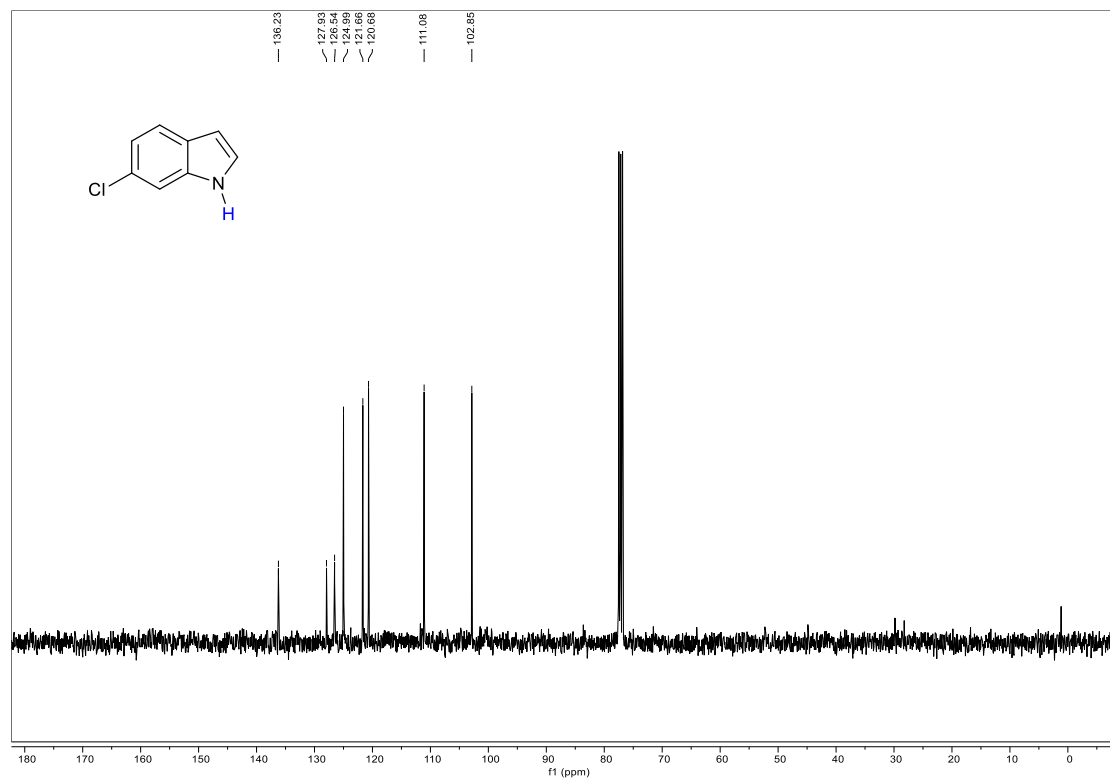

$^1\text{H}$  NMR spectra of **2d** ( $\text{CDCl}_3$ , 400 MHz)

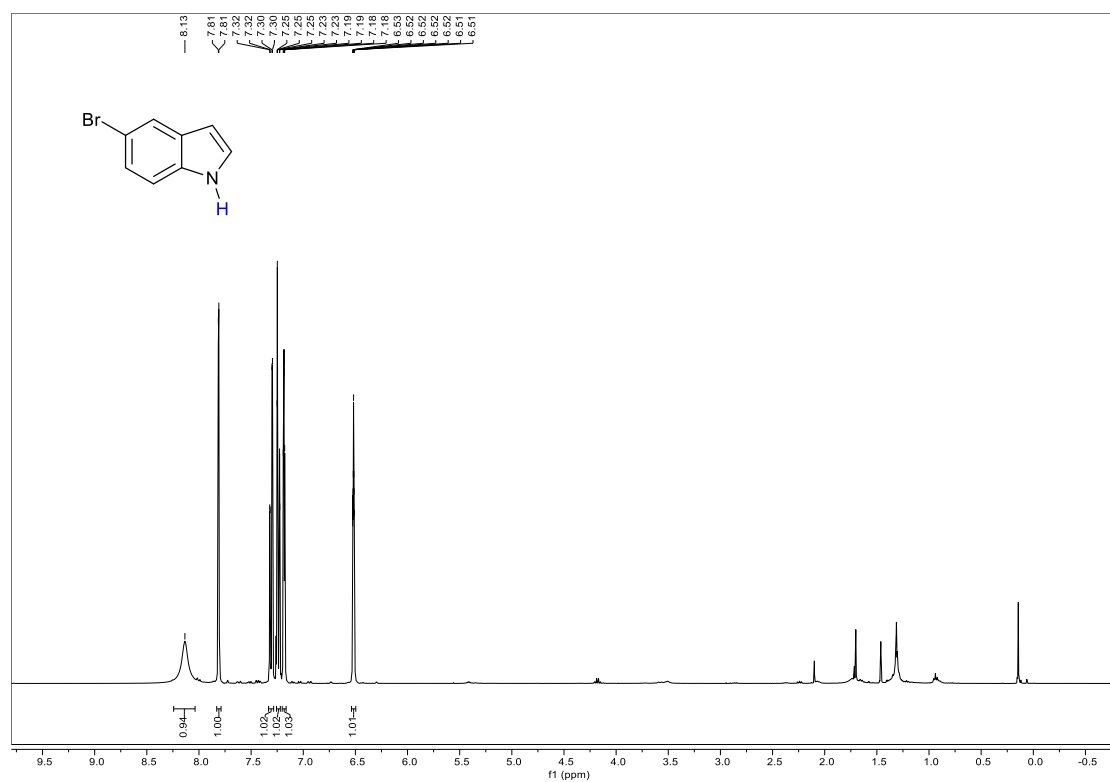

$^{13}\text{C}$  NMR spectra of **2d** ( $\text{CDCl}_3$ , 101 MHz)

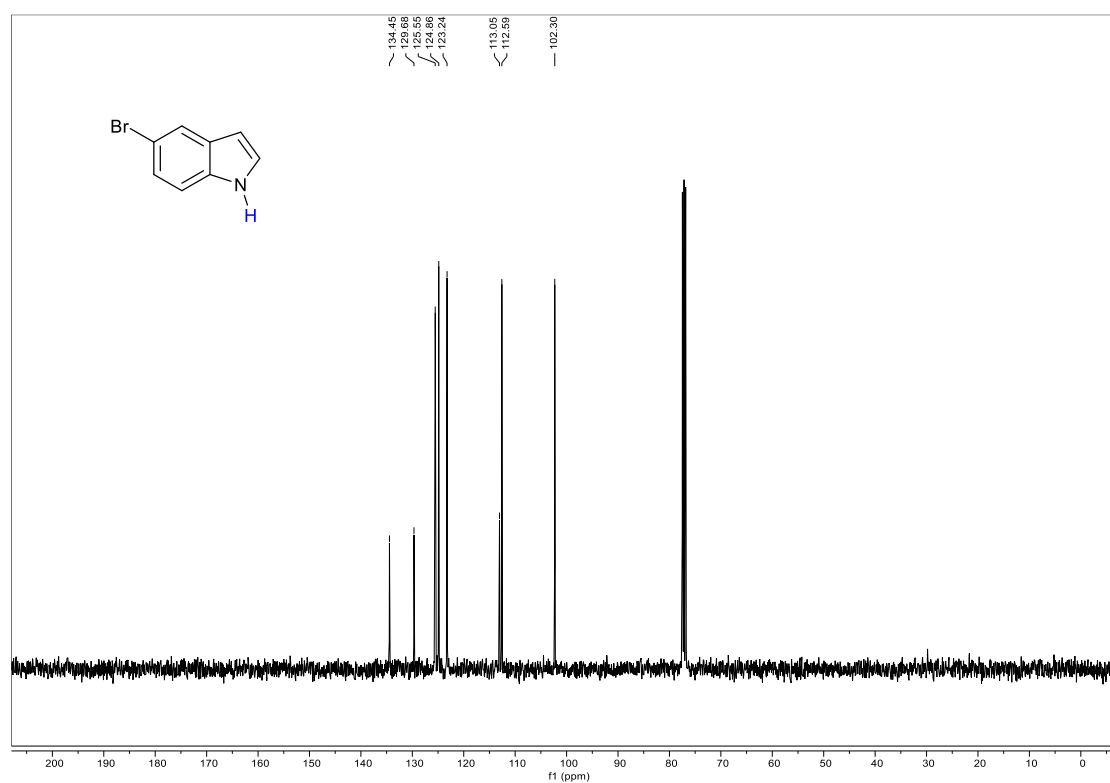

$^1\text{H}$  NMR spectra of **2e** ( $\text{CDCl}_3$ , 400 MHz)

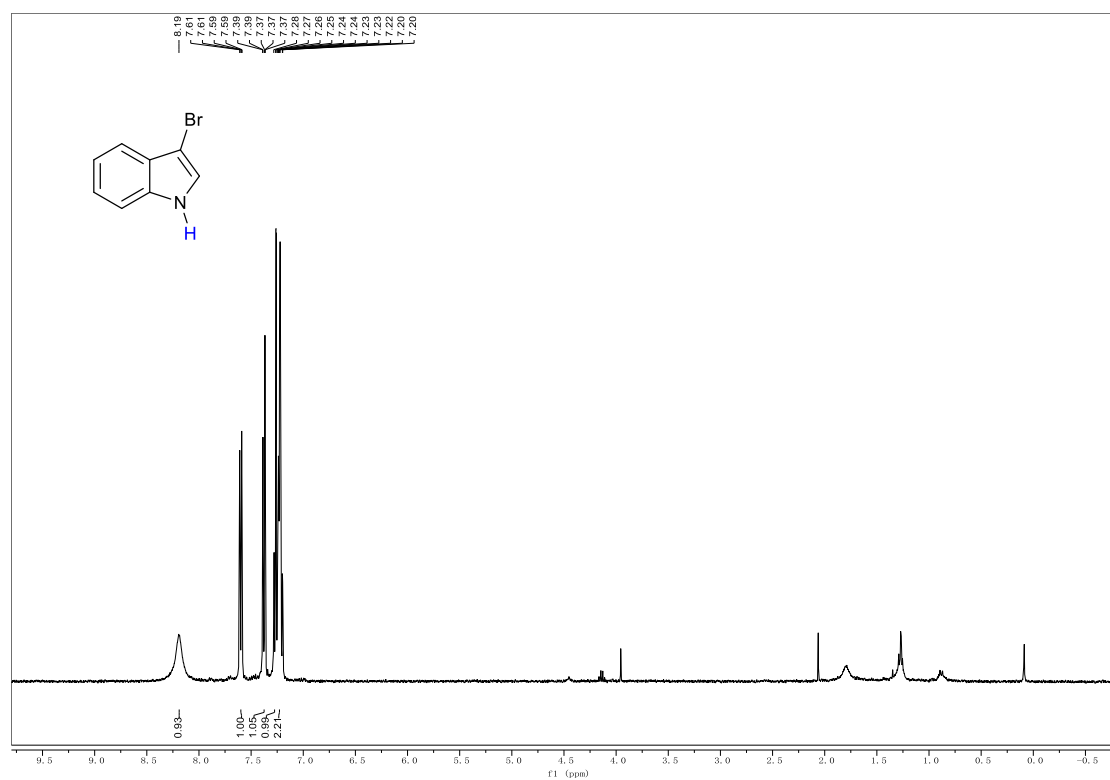

$^{13}\text{C}$  NMR spectra of **2e** ( $\text{CDCl}_3$ , 101 MHz)

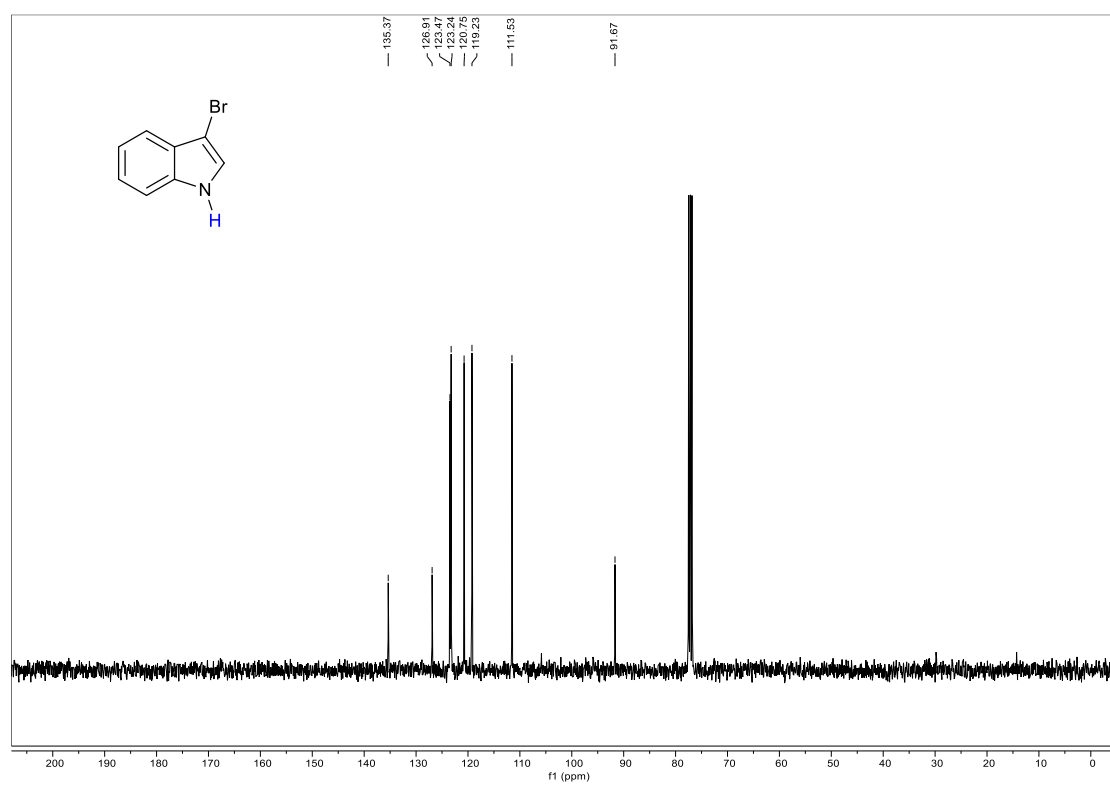

$^1\text{H}$  NMR spectra of **2f** (DMSO-*d*<sub>6</sub>, 400 MHz)

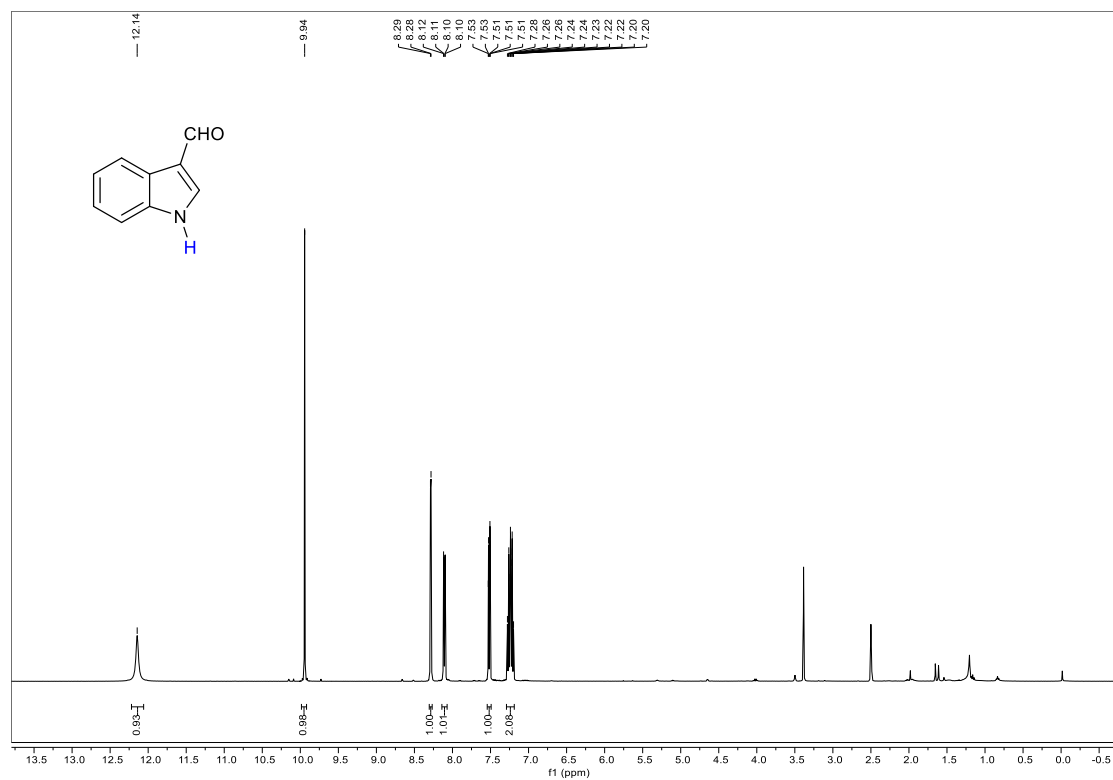

$^{13}\text{C}$  NMR spectra of **2f** (DMSO-*d*<sub>6</sub>, 101 MHz)

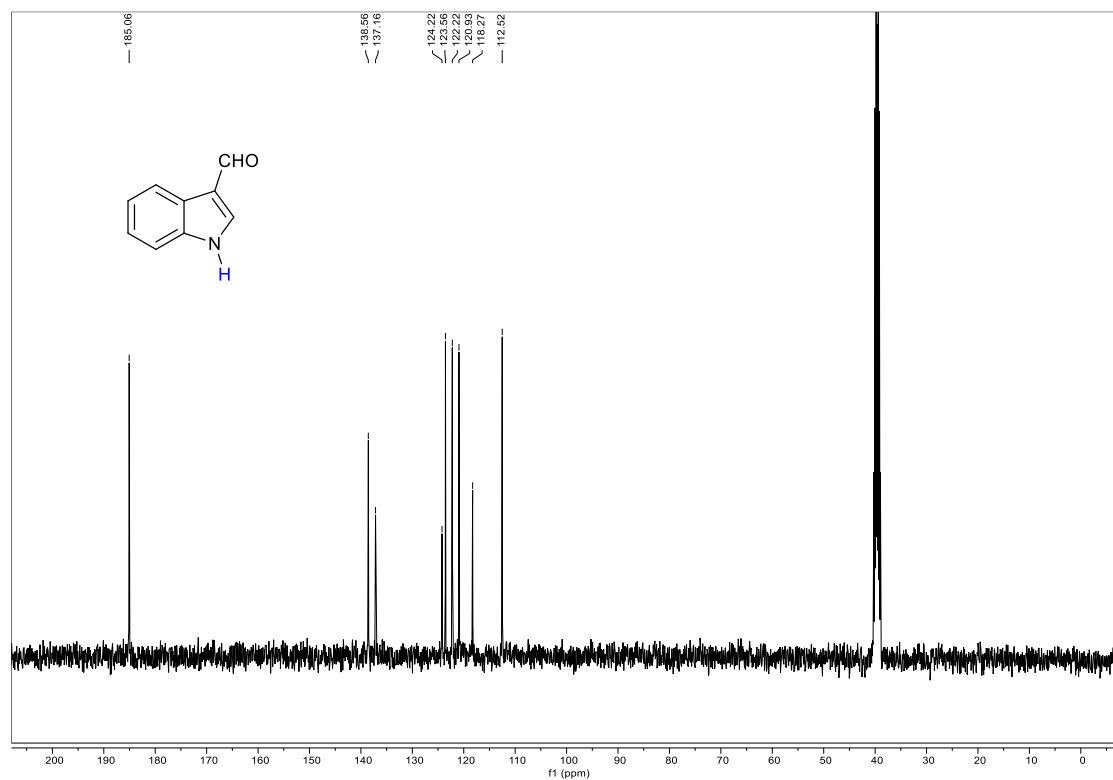

$^1\text{H}$  NMR spectra of **2g** ( $\text{CDCl}_3$ , 400 MHz)

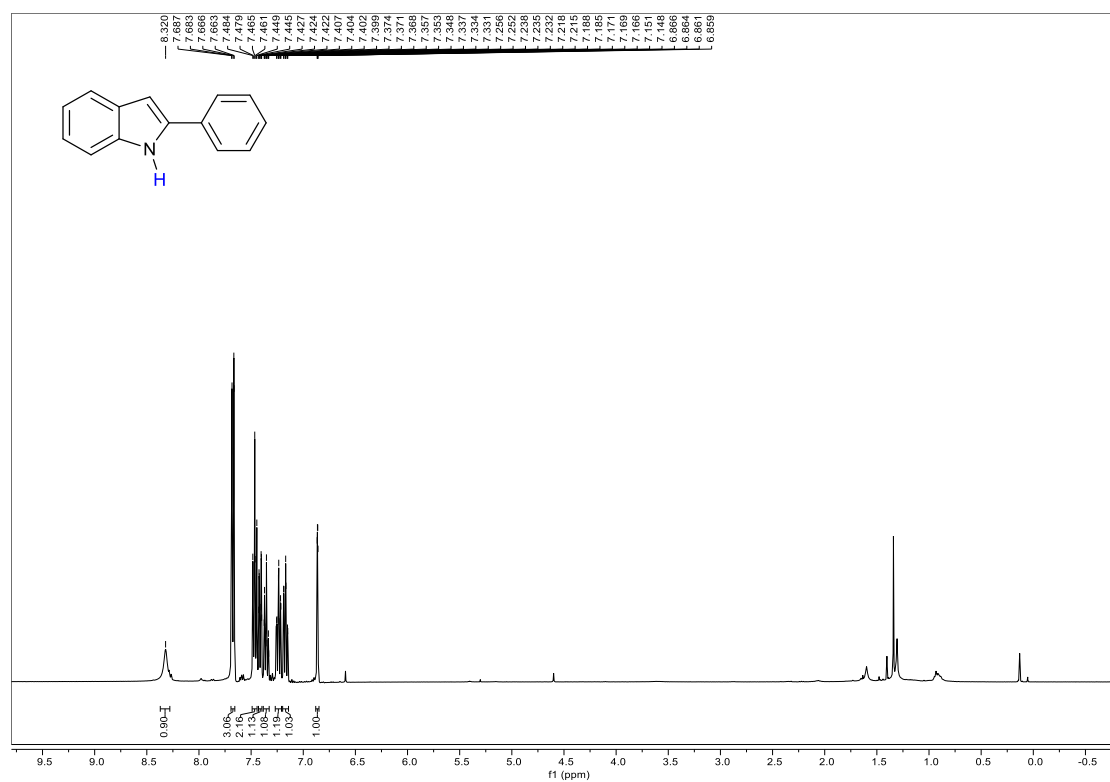

$^{13}\text{C}$  NMR spectra of **2g** ( $\text{CDCl}_3$ , 101 MHz)

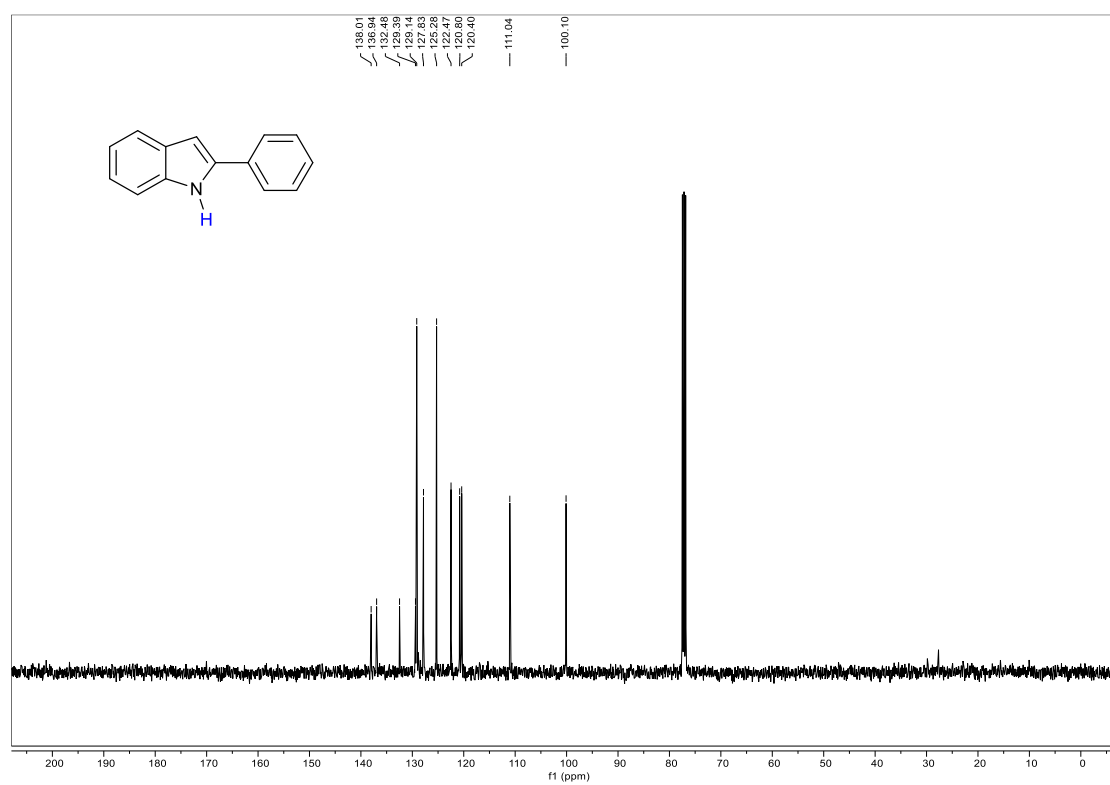

$^1\text{H}$  NMR spectra of **2h** (DMSO- $d_6$ , 400 MHz)

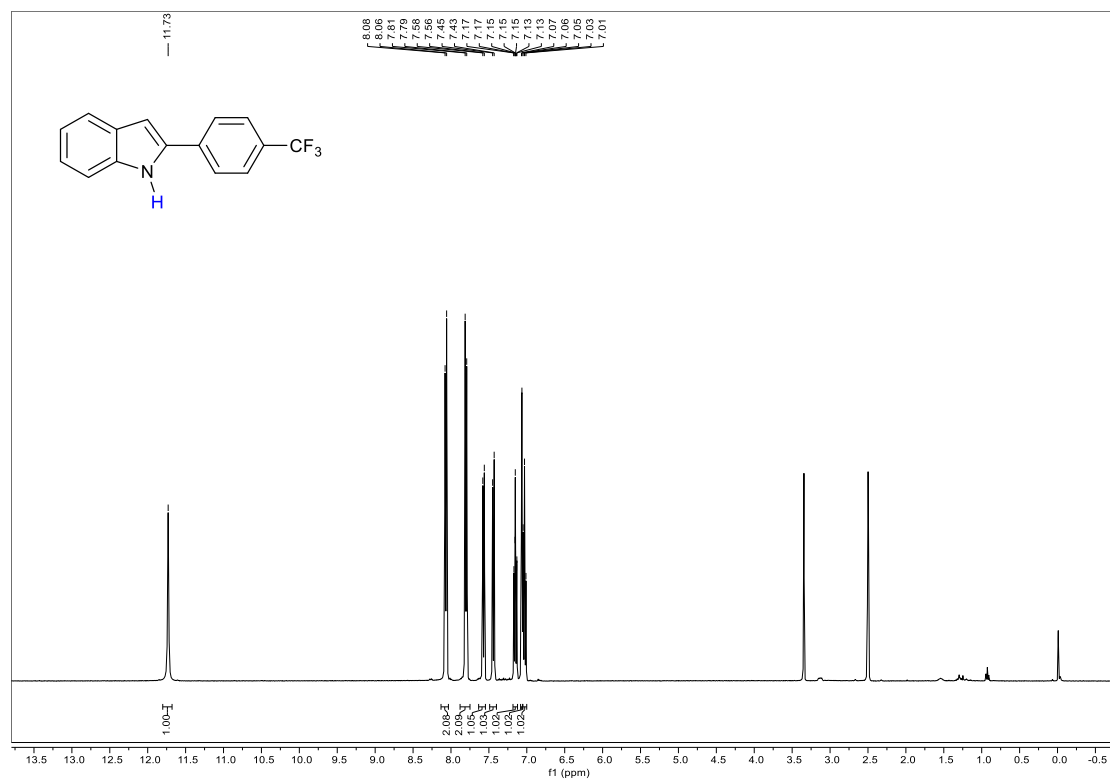

$^{13}\text{C}$  NMR spectra of **2h** (DMSO- $d_6$ , 101 MHz)

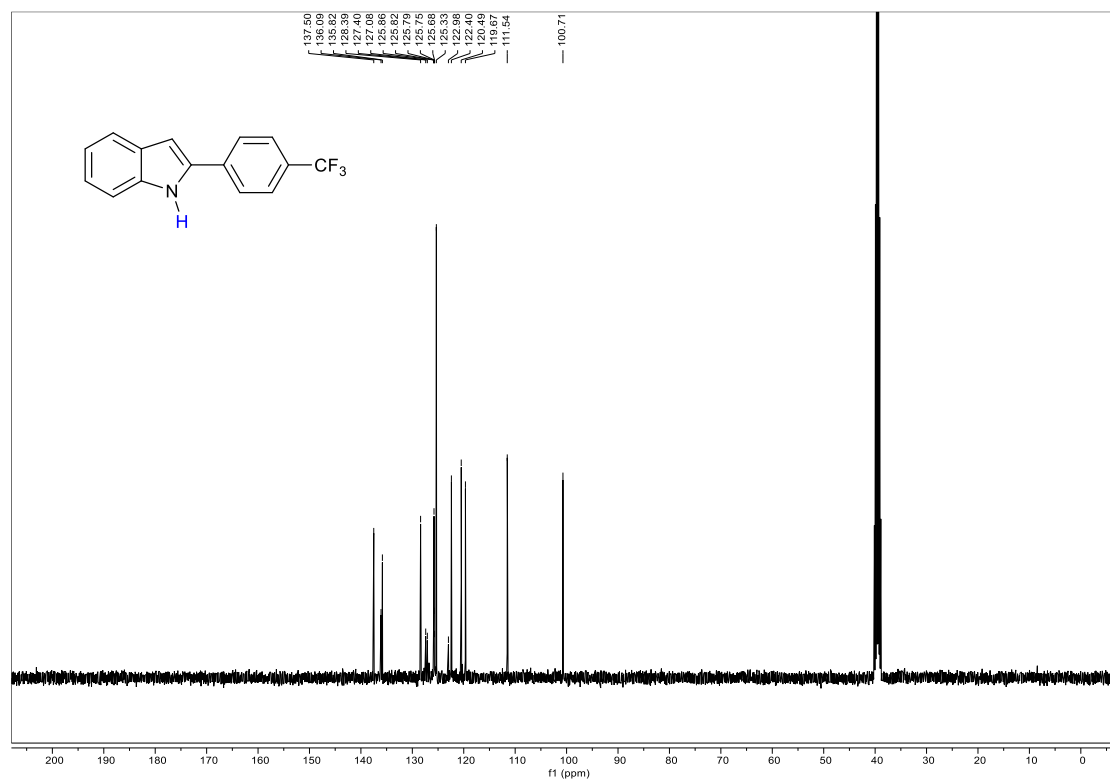



<sup>1</sup>H NMR spectra of **2i** (CDCl<sub>3</sub>, 400 MHz)

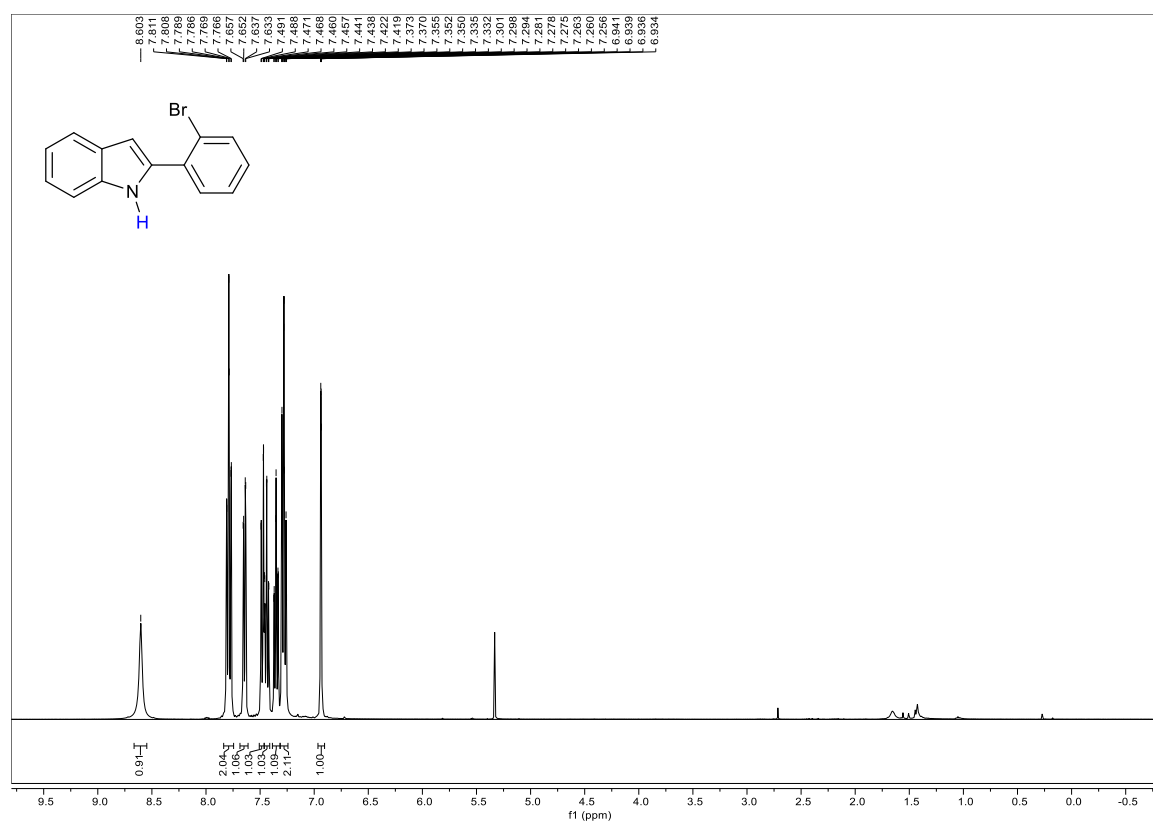

<sup>13</sup>C NMR spectra of **2i** (CDCl<sub>3</sub>, 101 MHz)

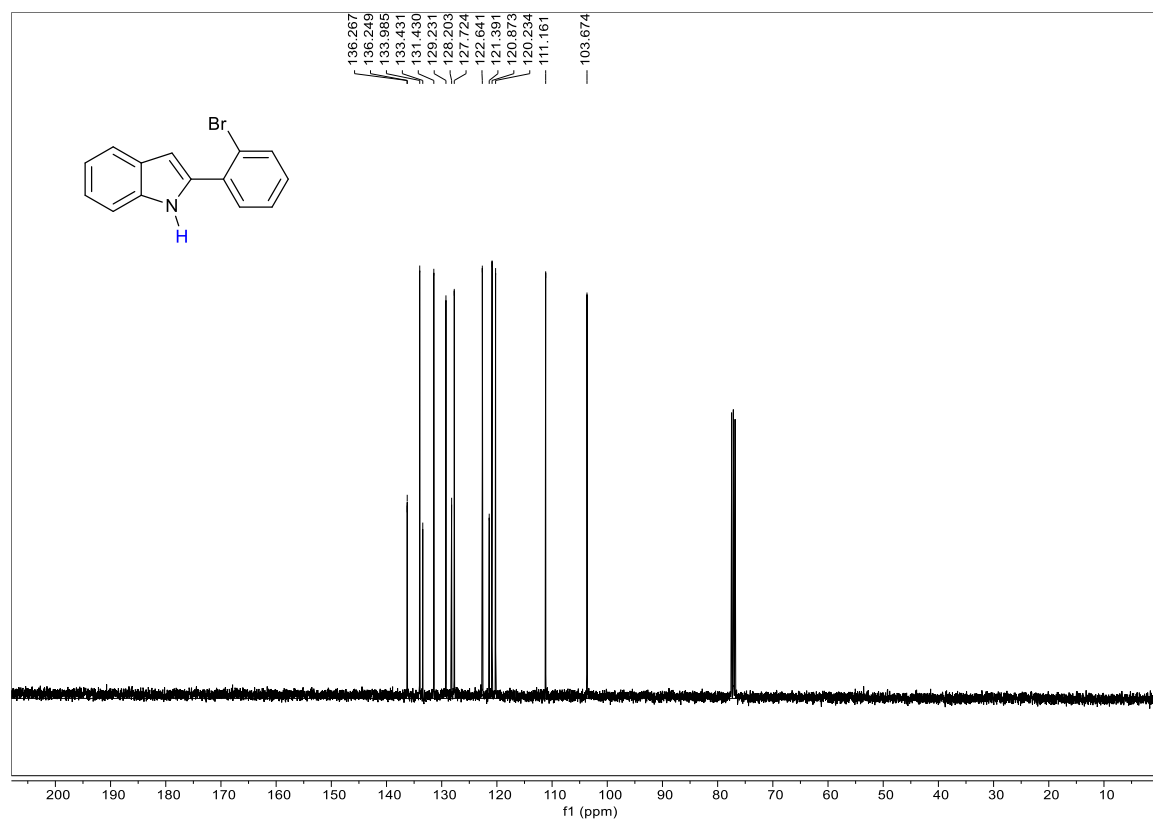

<sup>1</sup>H NMR spectra of **2j** (CDCl<sub>3</sub>, 400 MHz)

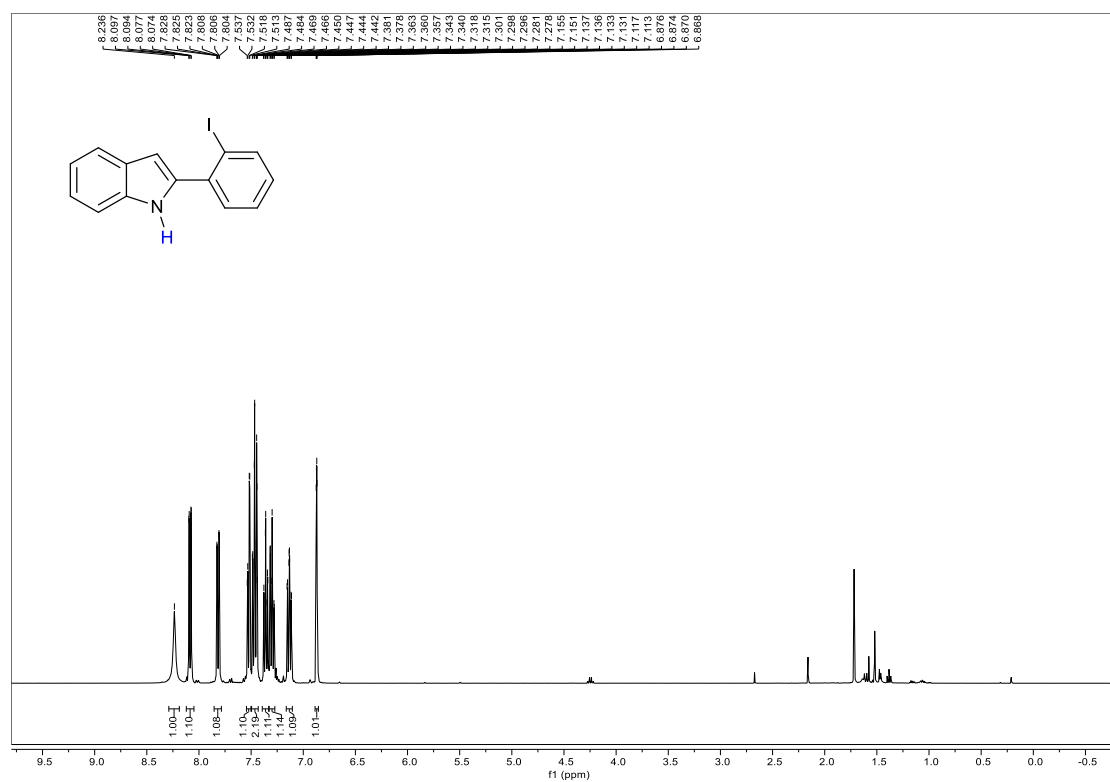

<sup>13</sup>C NMR spectra of **2j** (CDCl<sub>3</sub>, 101 MHz)

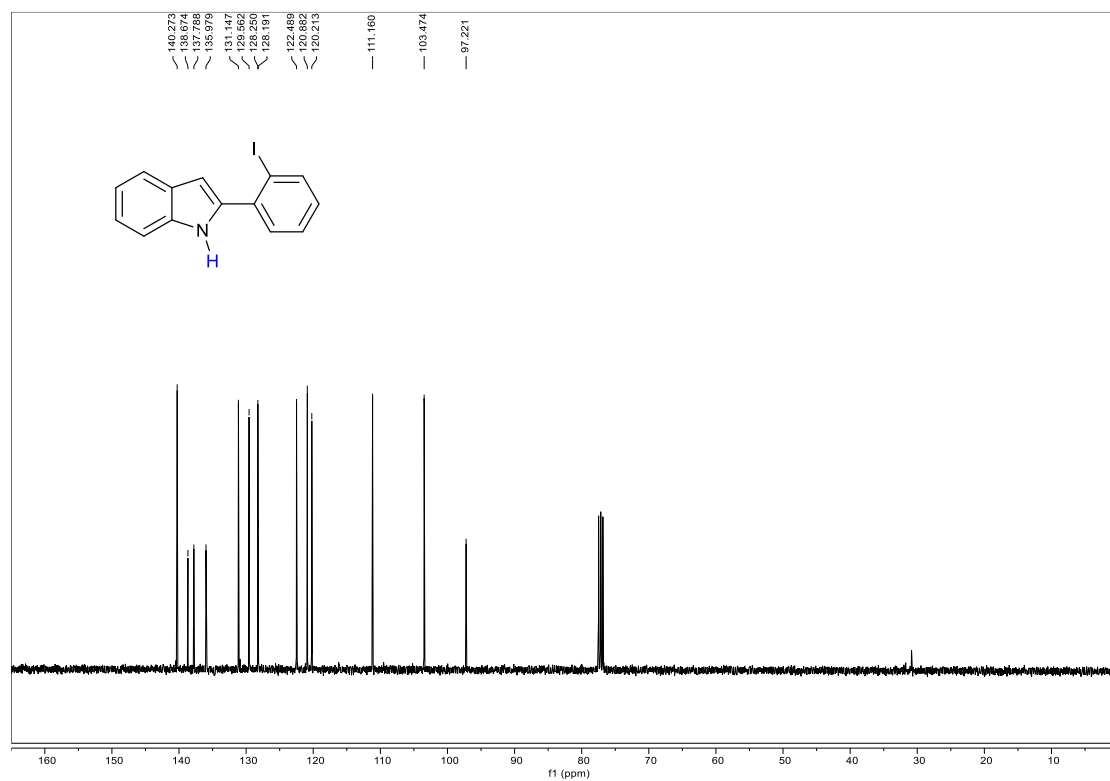

$^1\text{H}$  NMR spectra of **2k** ( $\text{CDCl}_3$ , 400 MHz)

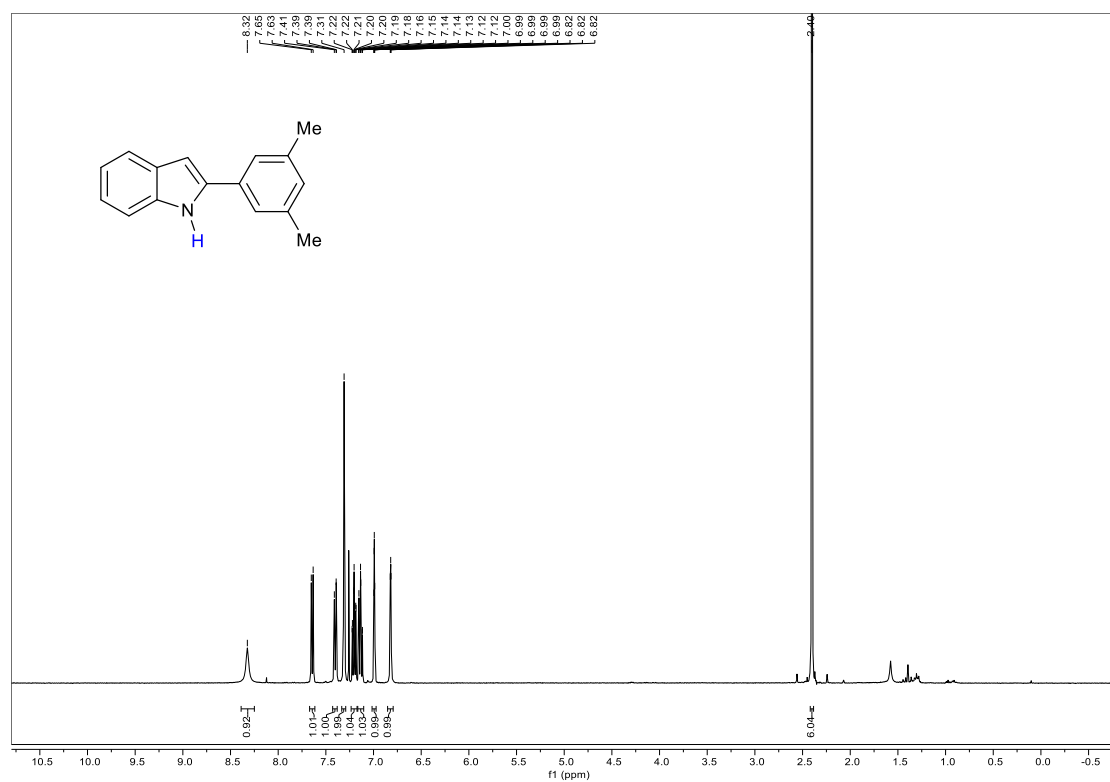

$^{13}\text{C}$  NMR spectra of **2k** ( $\text{CDCl}_3$ , 101 MHz)

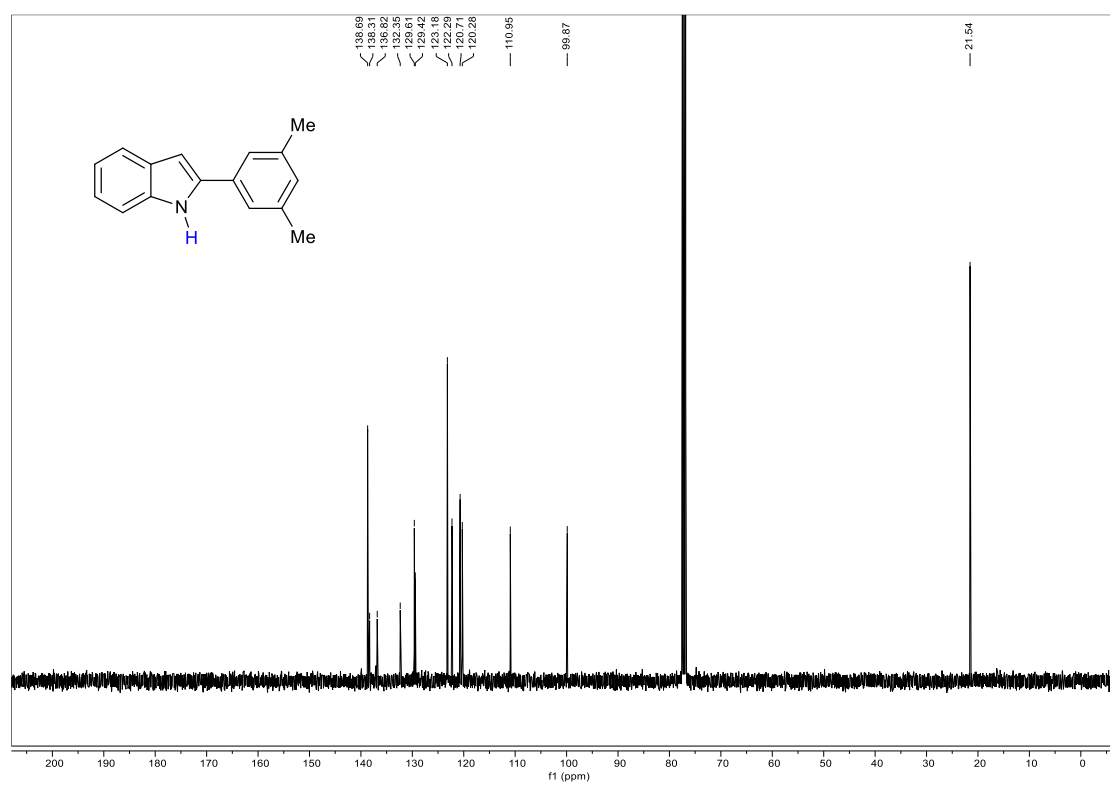

$^1\text{H}$  NMR spectra of **21** ( $\text{CDCl}_3$ , 400 MHz)

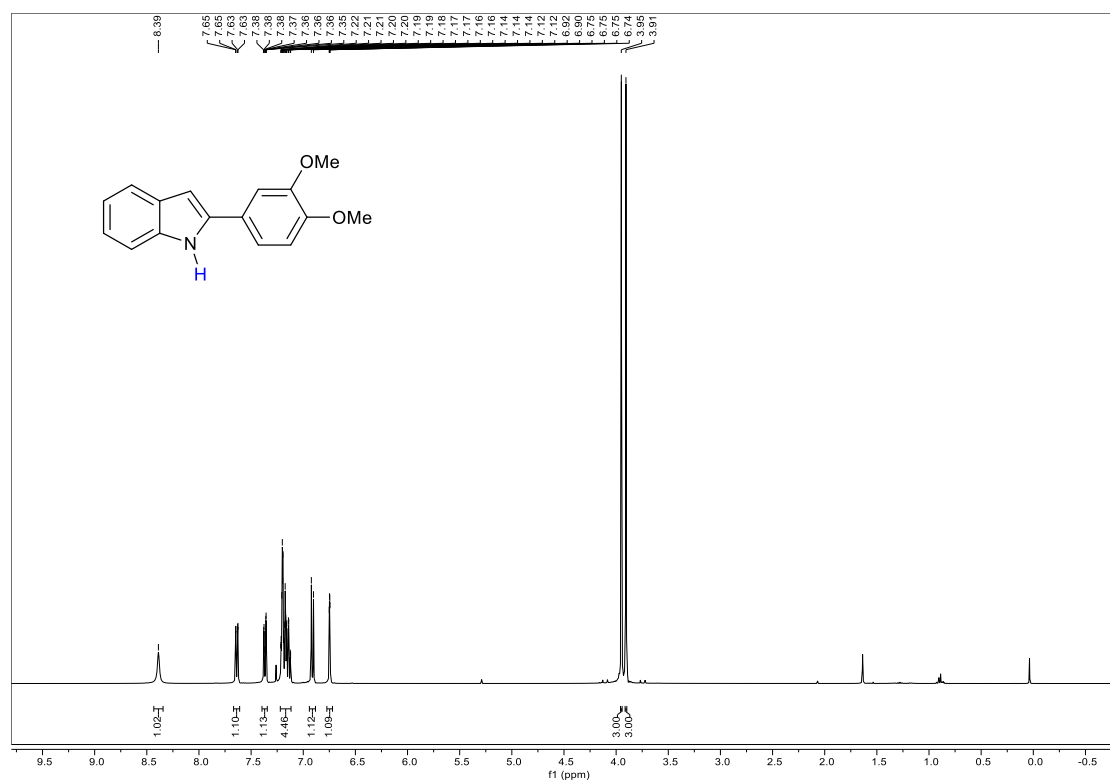

$^{13}\text{C}$  NMR spectra of **21** ( $\text{CDCl}_3$ , 101 MHz)

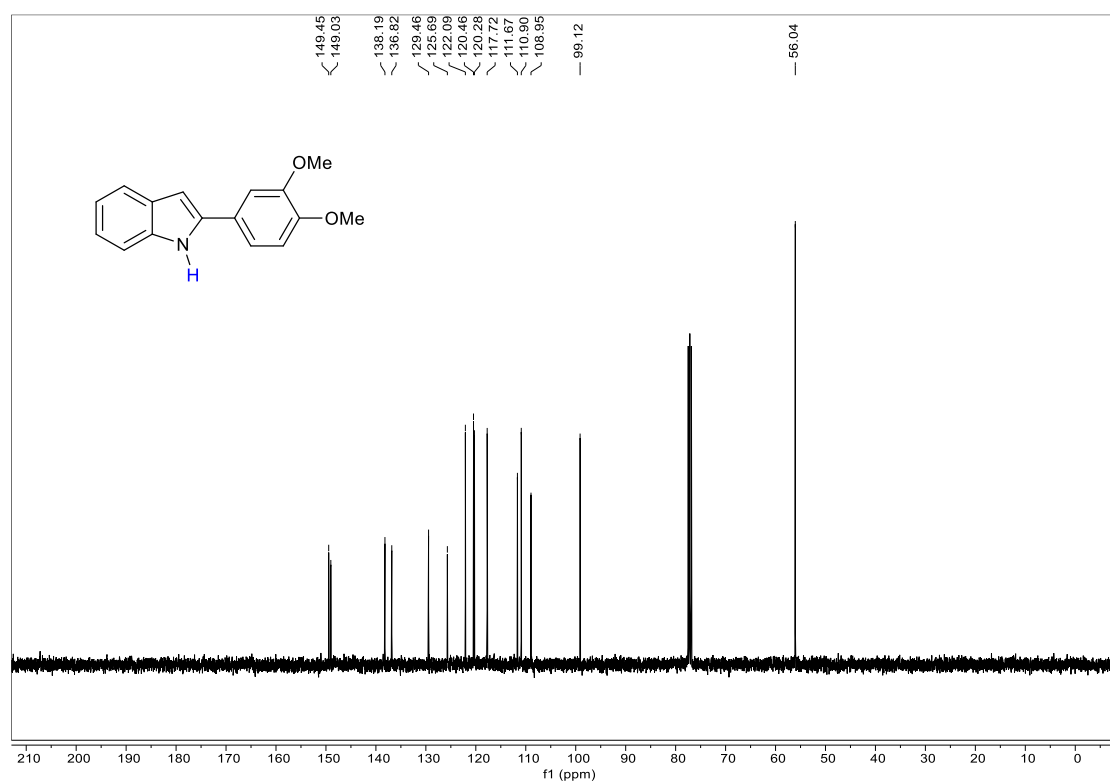

$^1\text{H}$  NMR spectra of **2m** ( $\text{CDCl}_3$ , 400 MHz)

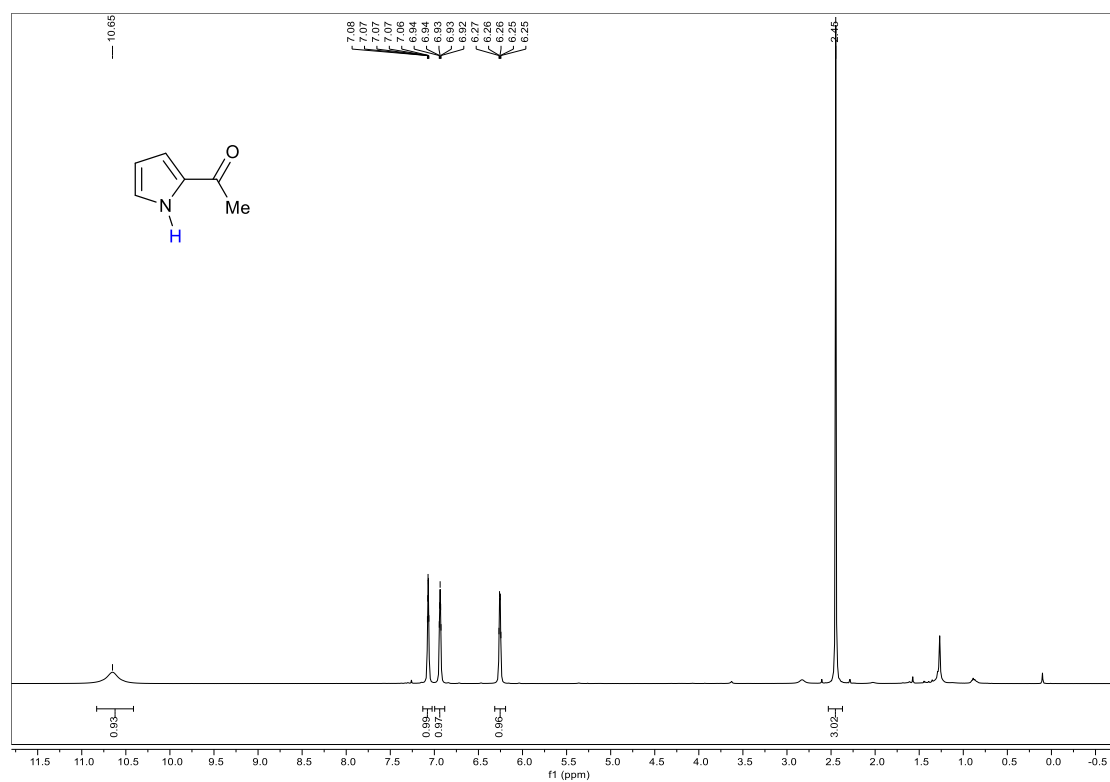

$^{13}\text{C}$  NMR spectra of **2m** ( $\text{CDCl}_3$ , 101 MHz)

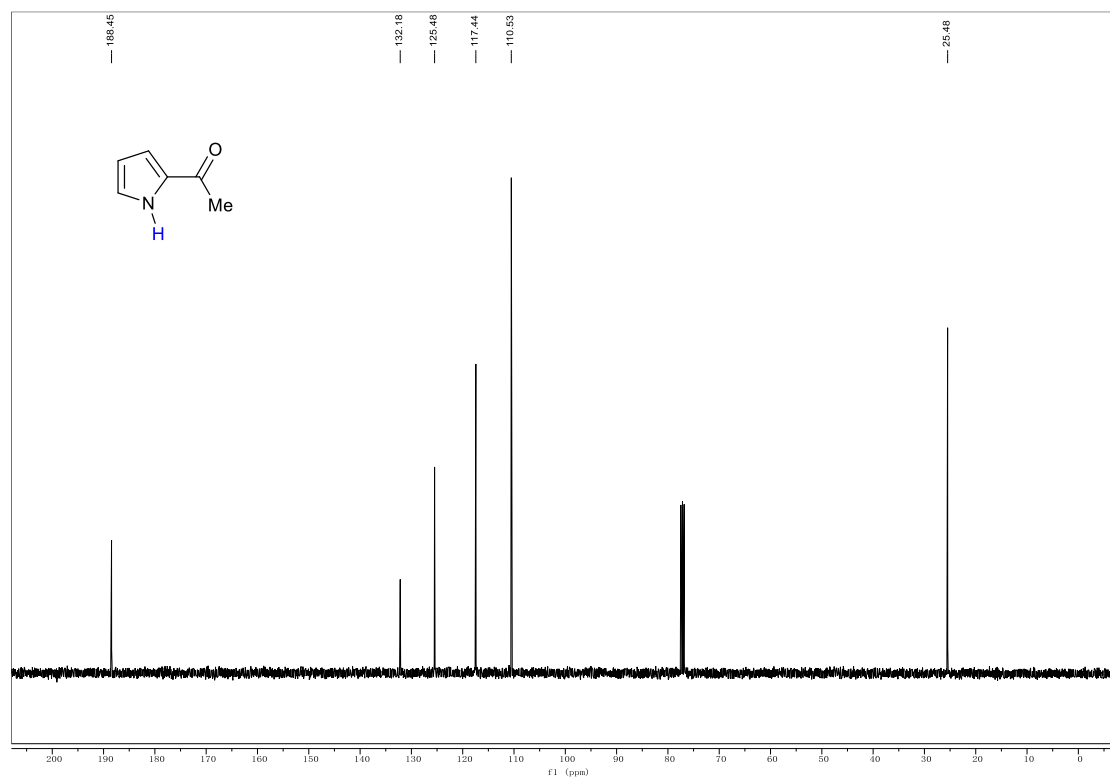

$^1\text{H}$  NMR spectra of **2n** ( $\text{CDCl}_3$ , 400 MHz)

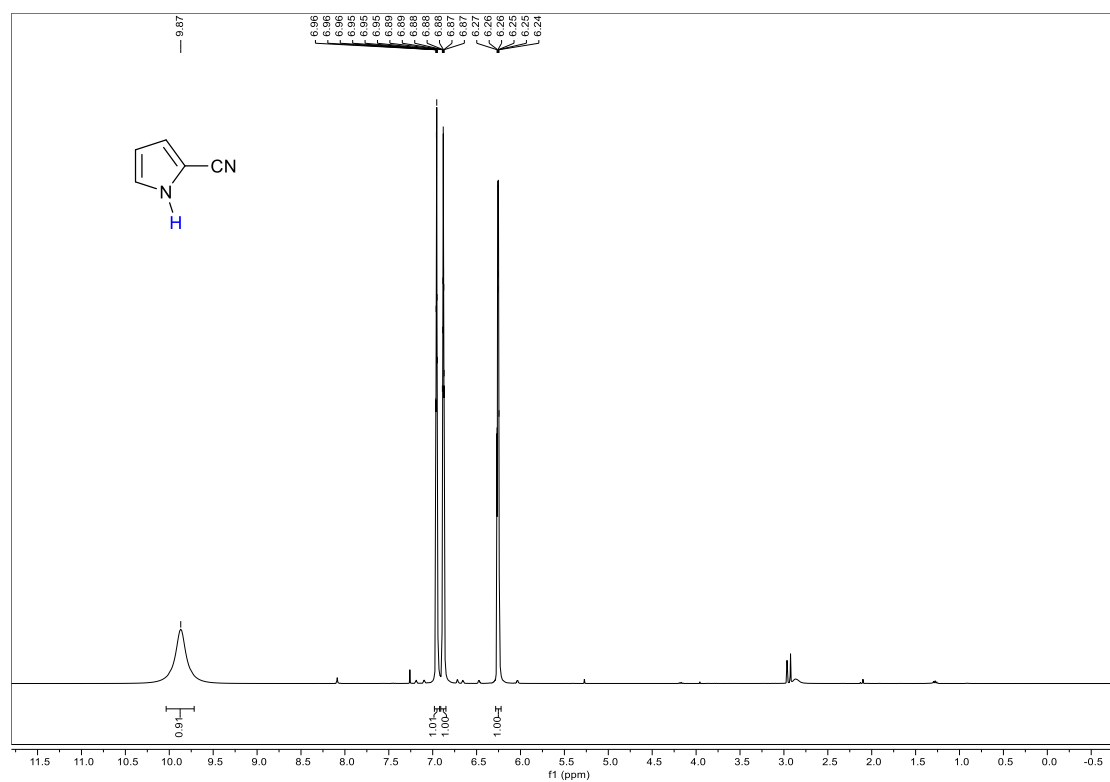

$^{13}\text{C}$  NMR spectra of **2n** ( $\text{CDCl}_3$ , 101 MHz)

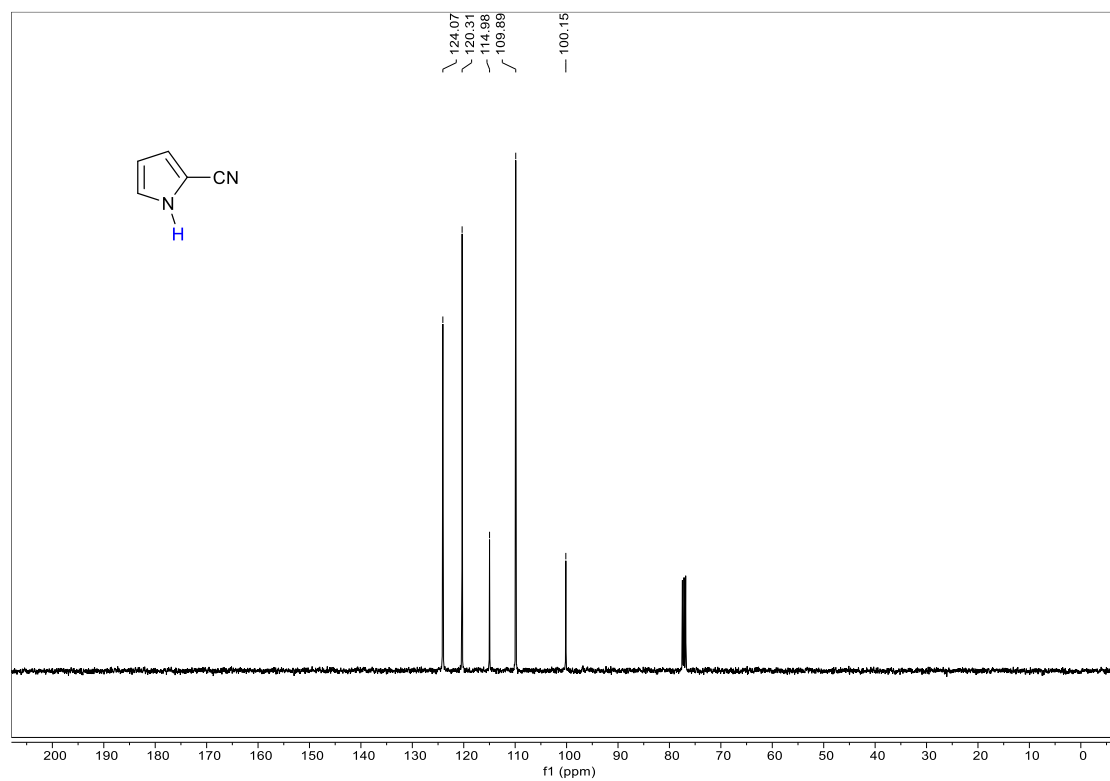

$^1\text{H}$  NMR spectra of **2o** ( $\text{CDCl}_3$ , 400 MHz)

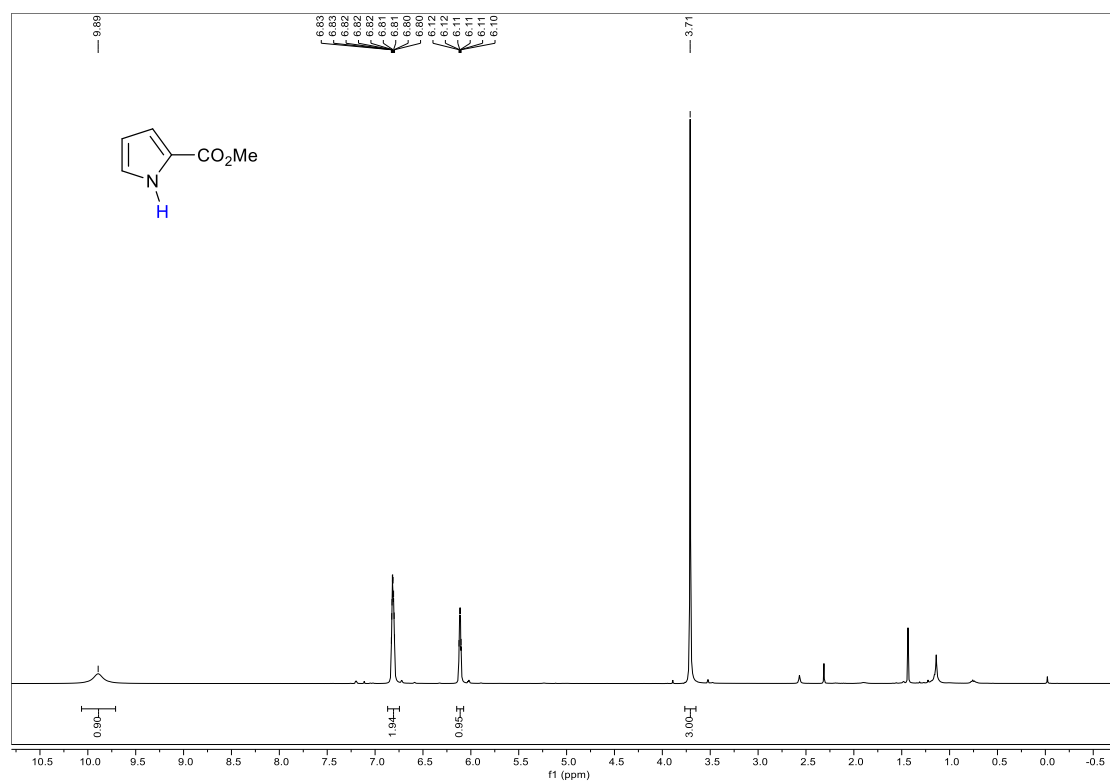

$^{13}\text{C}$  NMR spectra of **2o** ( $\text{CDCl}_3$ , 101 MHz)

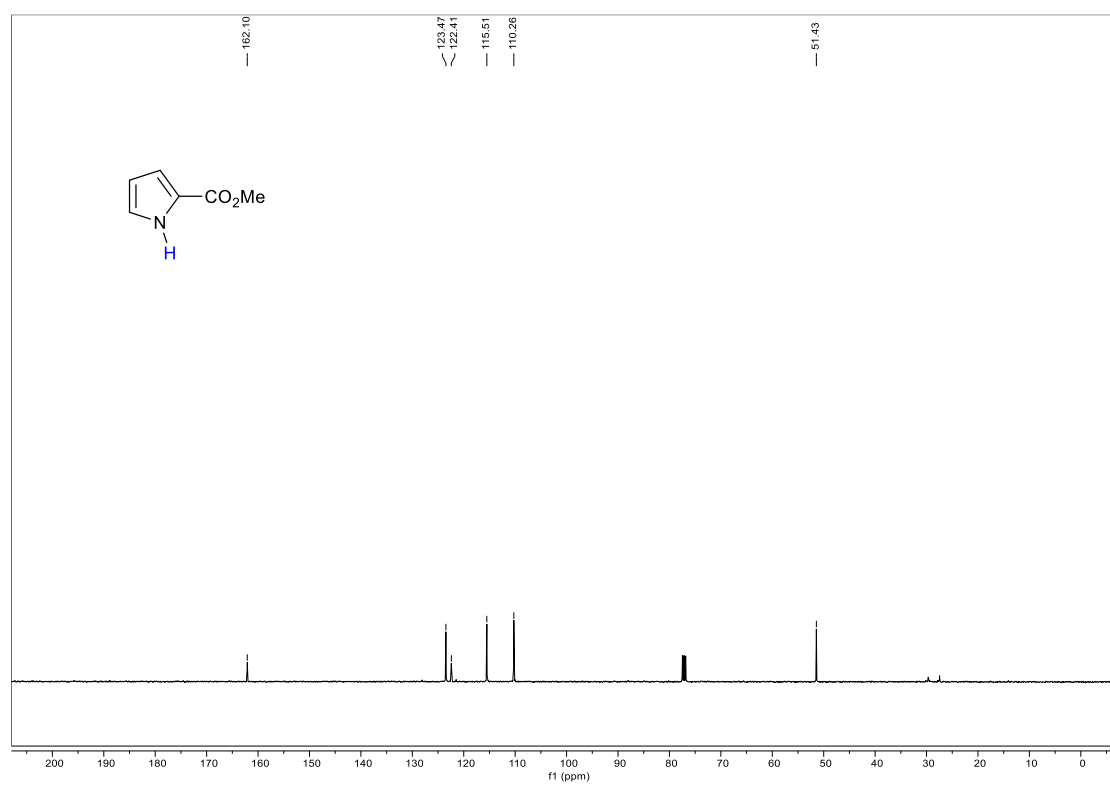

$^1\text{H}$  NMR spectra of **2p** (DMSO-*d*<sub>6</sub>, 400 MHz)

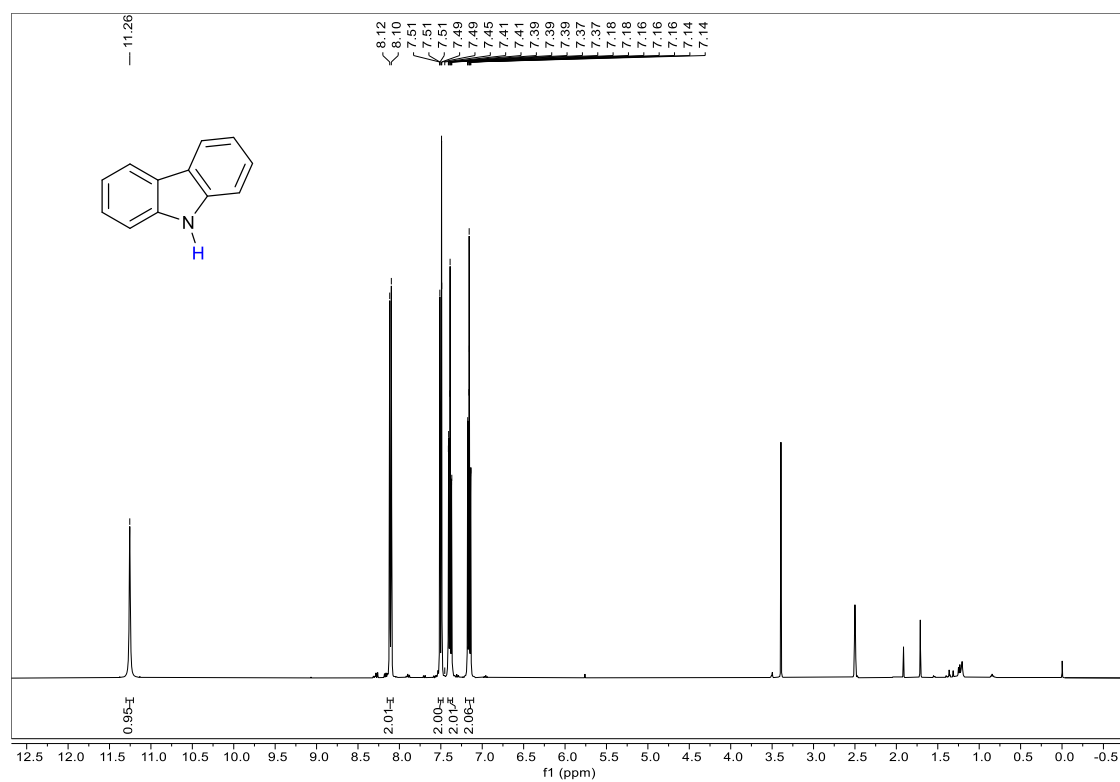

$^{13}\text{C}$  NMR spectra of **2p** (DMSO-*d*<sub>6</sub>, 101 MHz)

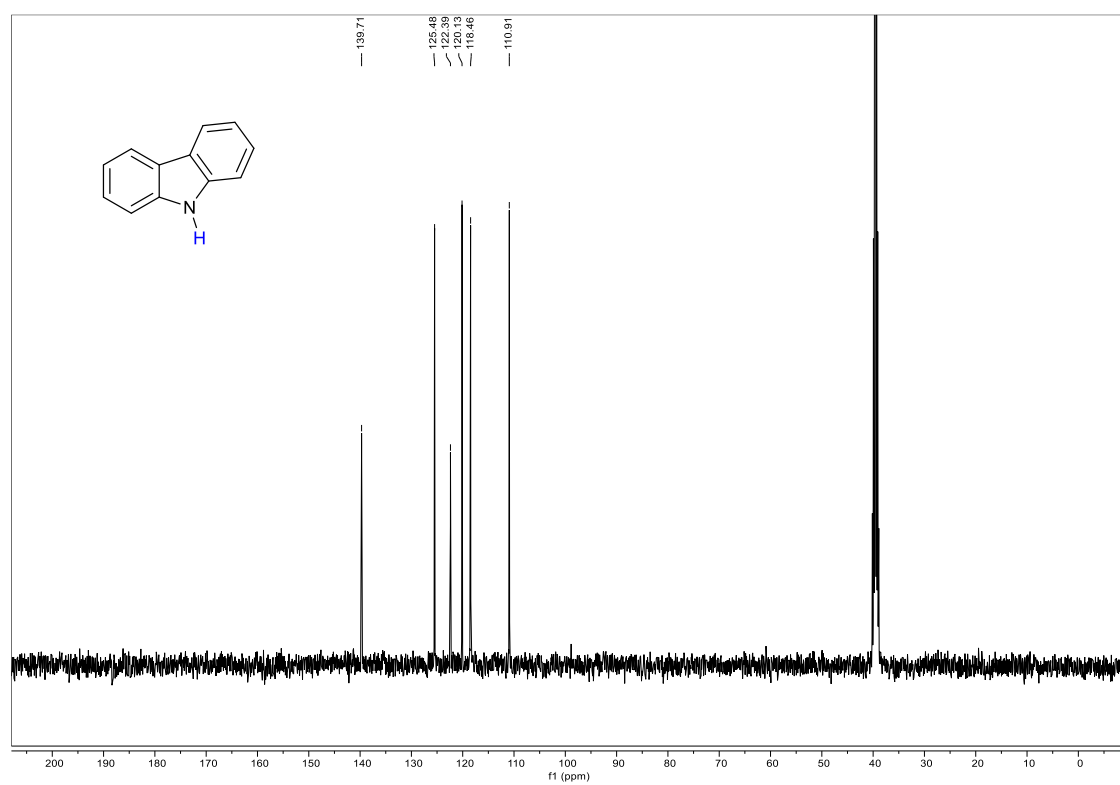



$^1\text{H}$  NMR spectra of **2q** ( $\text{CDCl}_3$ , 400 MHz)

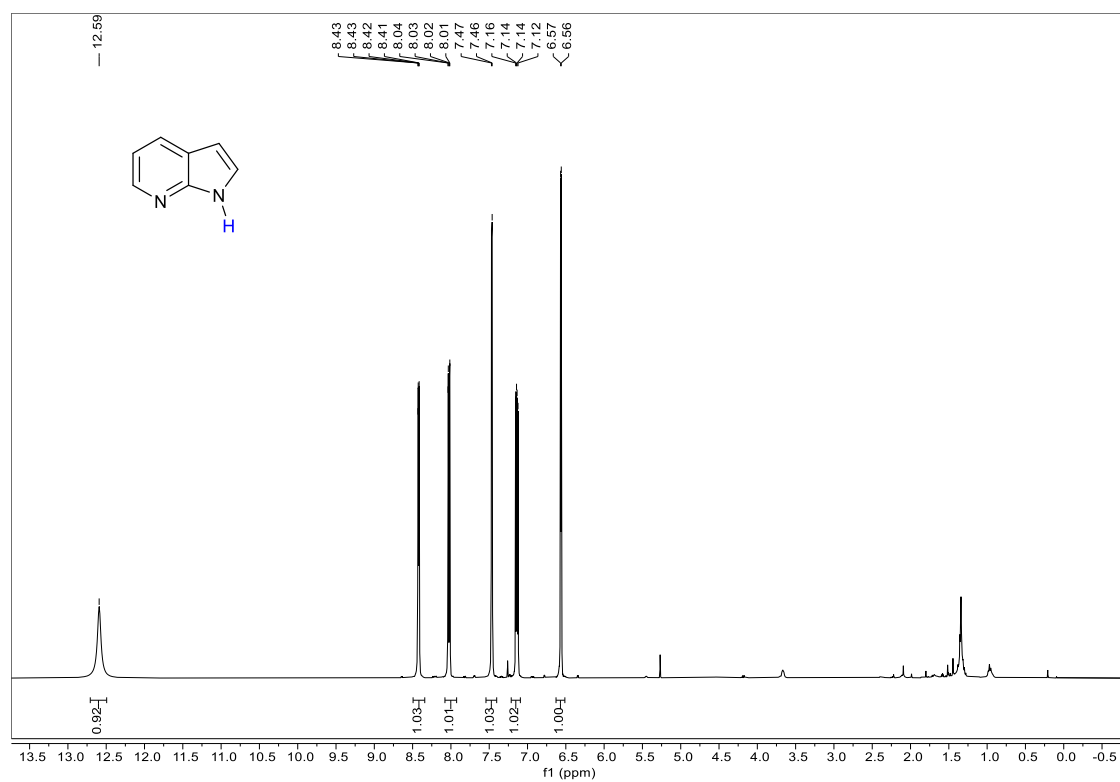

$^{13}\text{C}$  NMR spectra of **2q** ( $\text{CDCl}_3$ , 101 MHz)

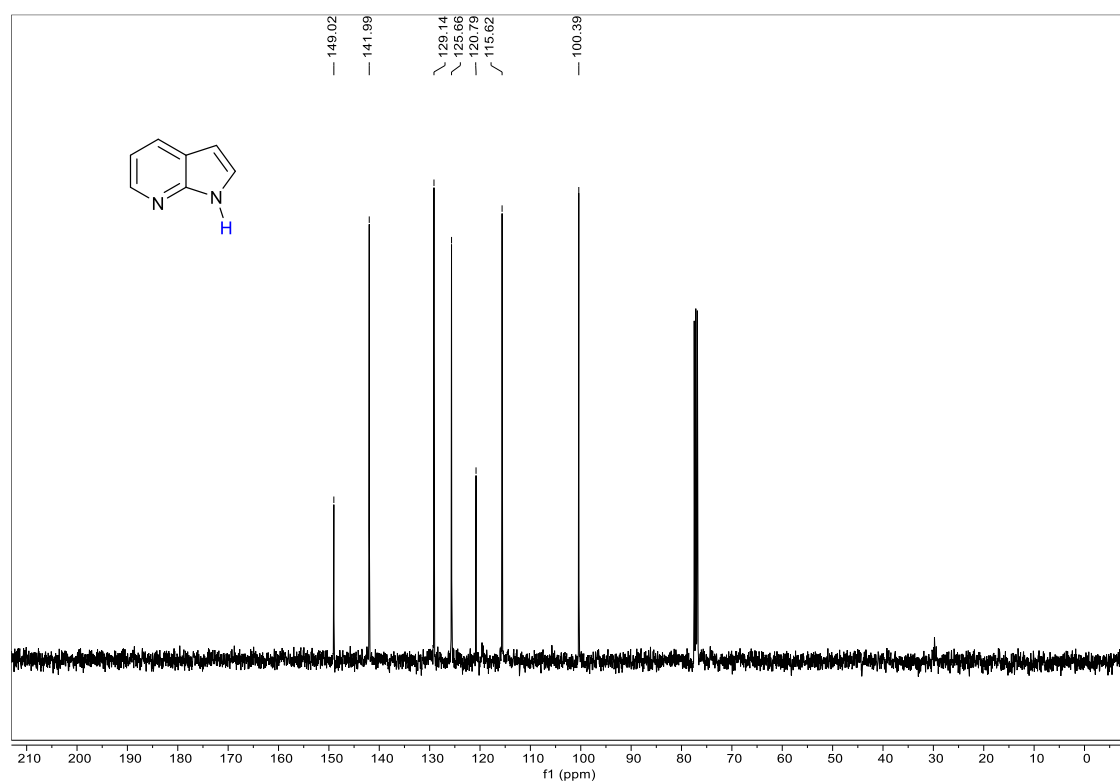

$^1\text{H}$  NMR spectra of **2r** ( $\text{CDCl}_3$ , 400 MHz)

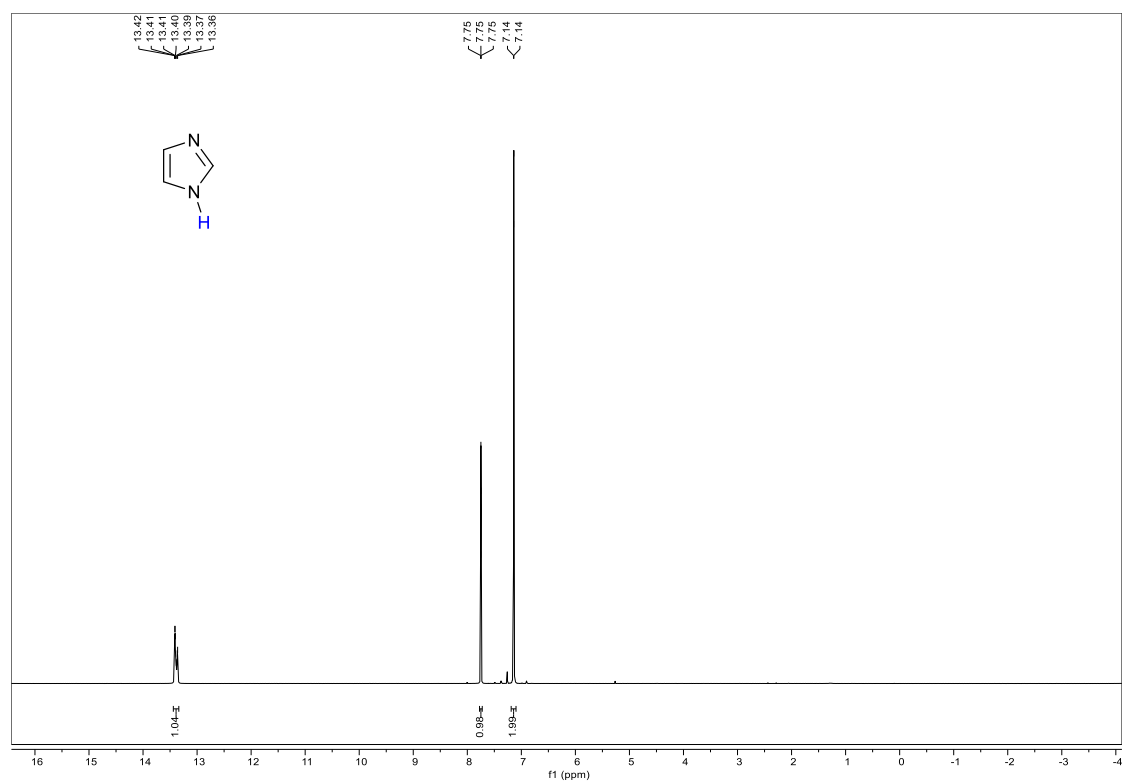

$^{13}\text{C}$  NMR spectra of **2r** ( $\text{CDCl}_3$ , 101 MHz)

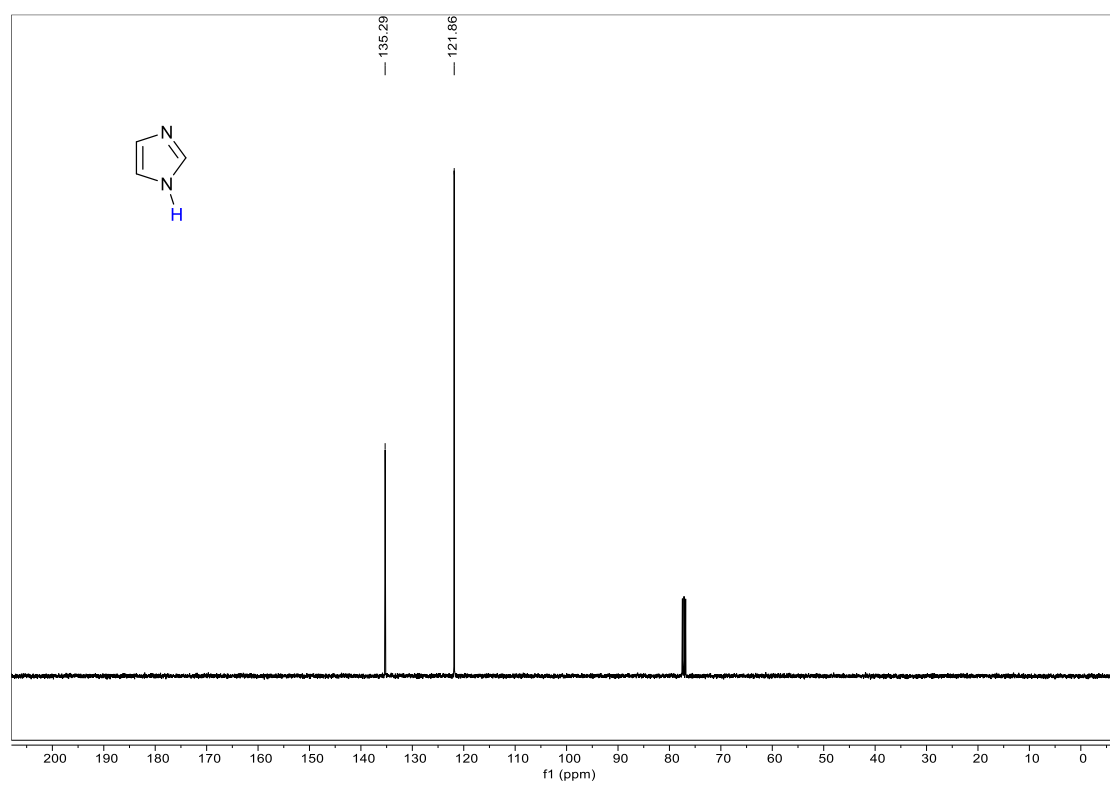

$^1\text{H}$  NMR spectra of **2s** (DMSO-*d*<sub>6</sub>, 400 MHz)

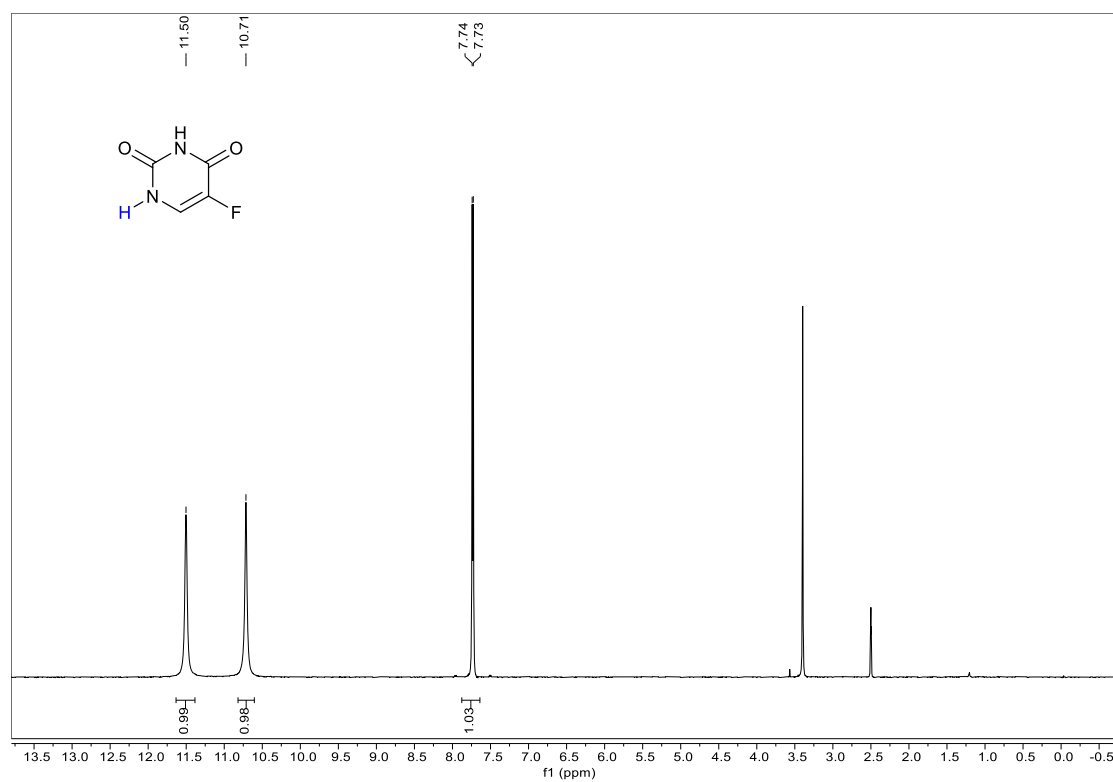

$^{13}\text{C}$  NMR spectra of **2s** (DMSO-*d*<sub>6</sub>, 101 MHz)

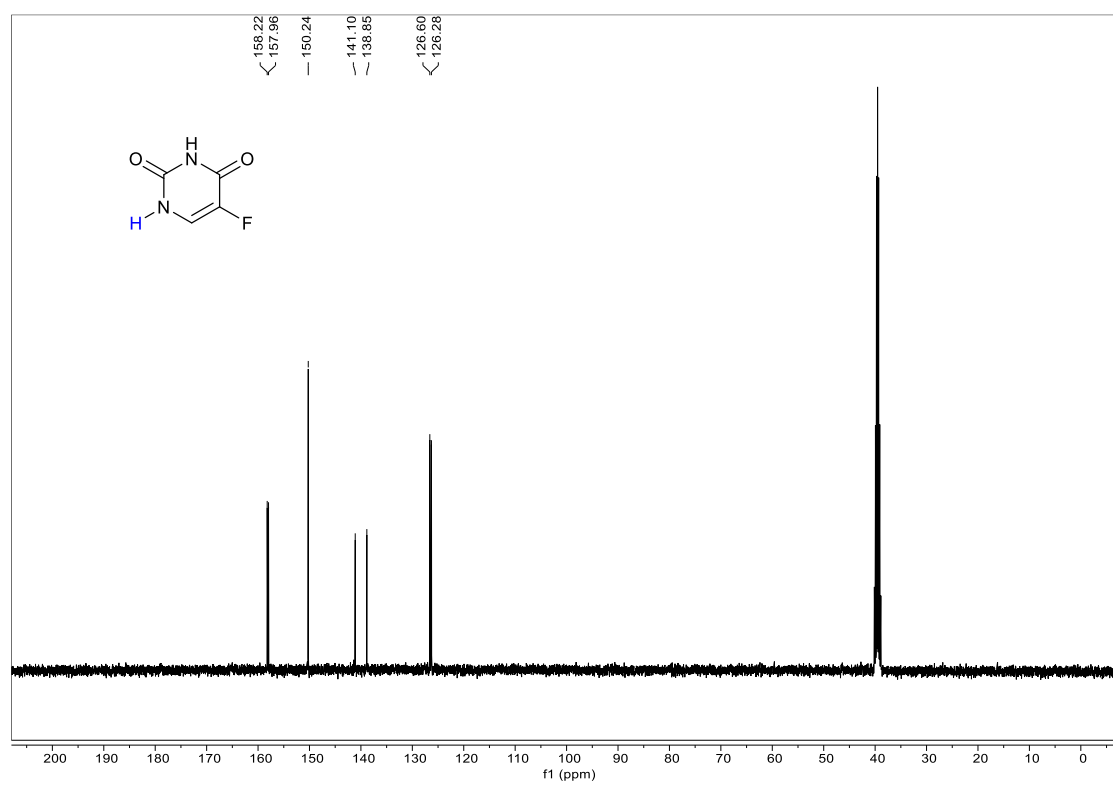

$^1\text{H}$  NMR spectra of **4a** (DMSO-*d*<sub>6</sub>, 400 MHz)

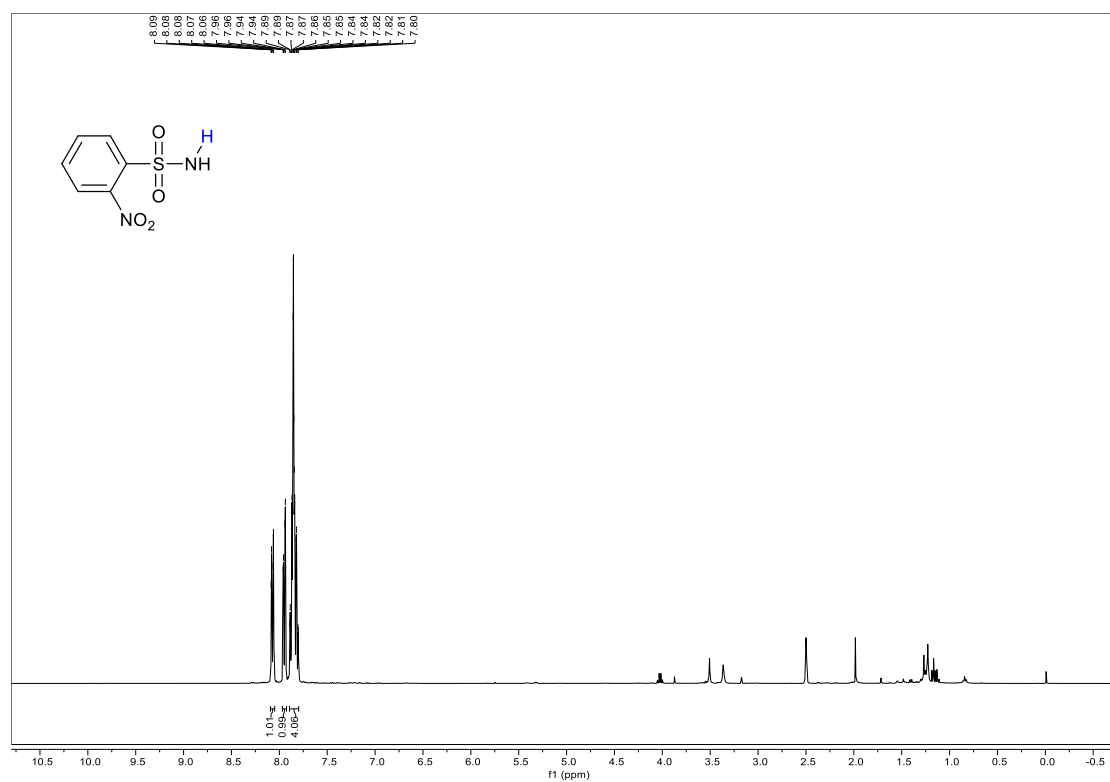

$^{13}\text{C}$  NMR spectra of **4a** (DMSO-*d*<sub>6</sub>, 101 MHz)

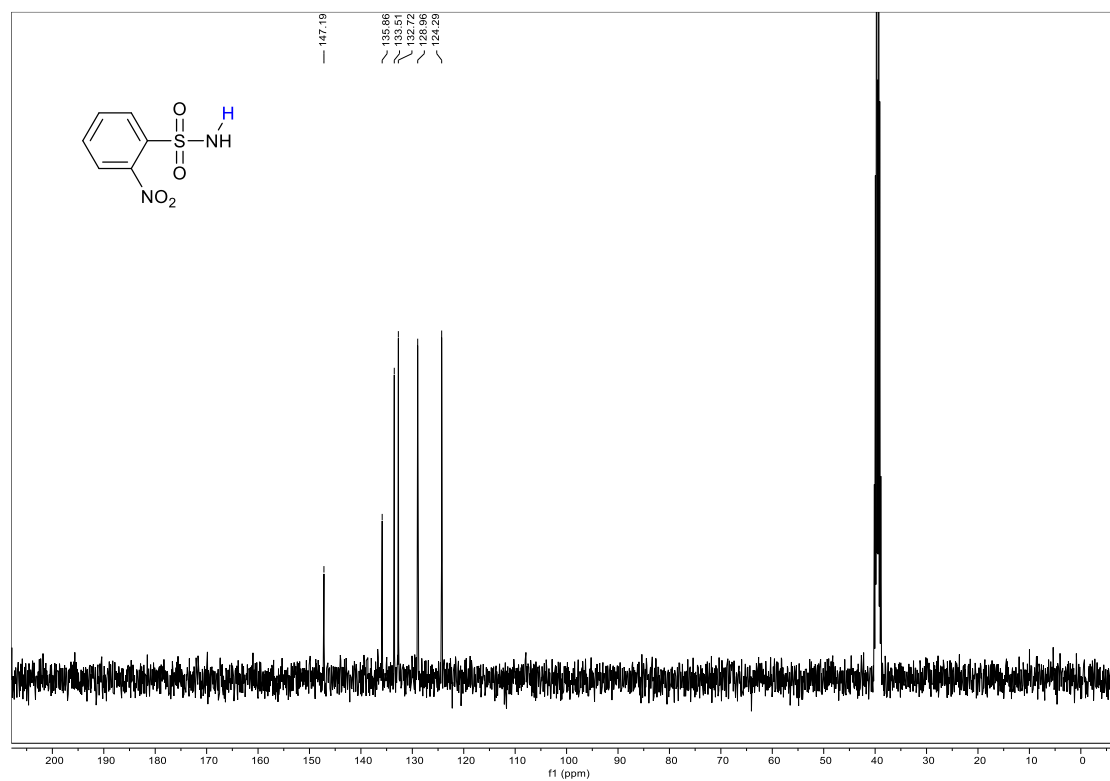

$^1\text{H}$  NMR spectra of **4b** ( $\text{CDCl}_3$ , 400 MHz)

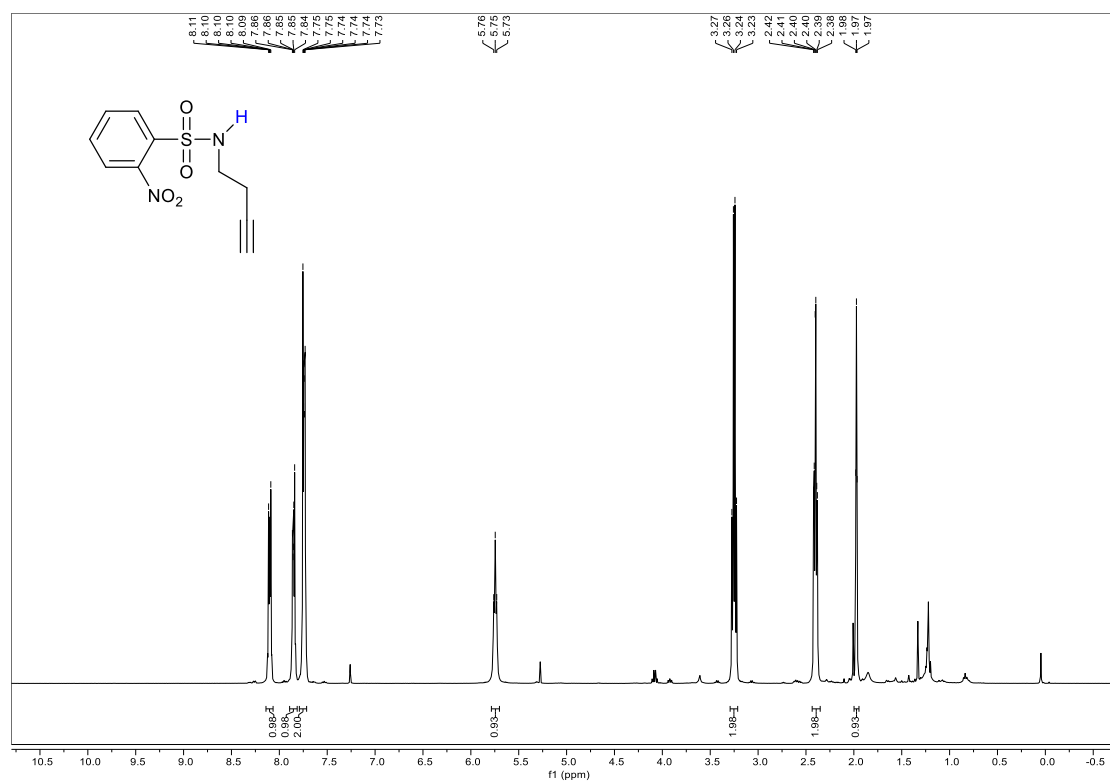

$^{13}\text{C}$  NMR spectra of **4b** ( $\text{CDCl}_3$ , 101 MHz)

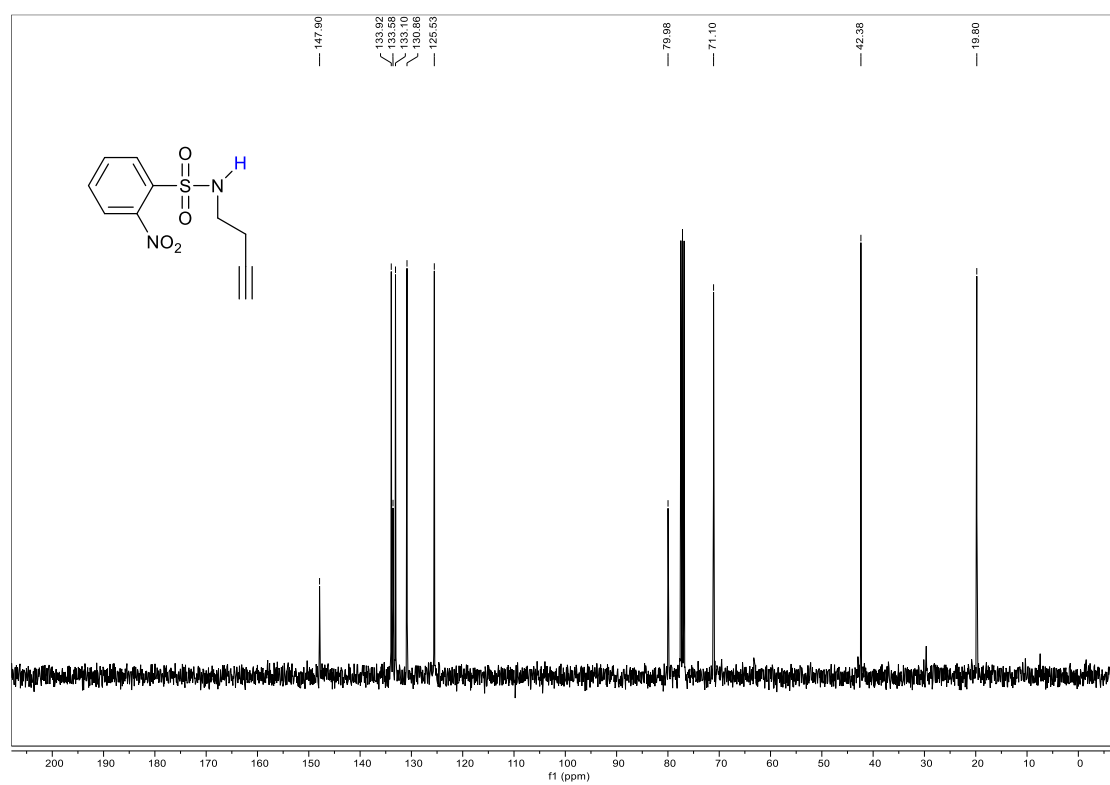

$^1\text{H}$  NMR spectra of **4c** (DMSO-*d*<sub>6</sub>, 400 MHz)

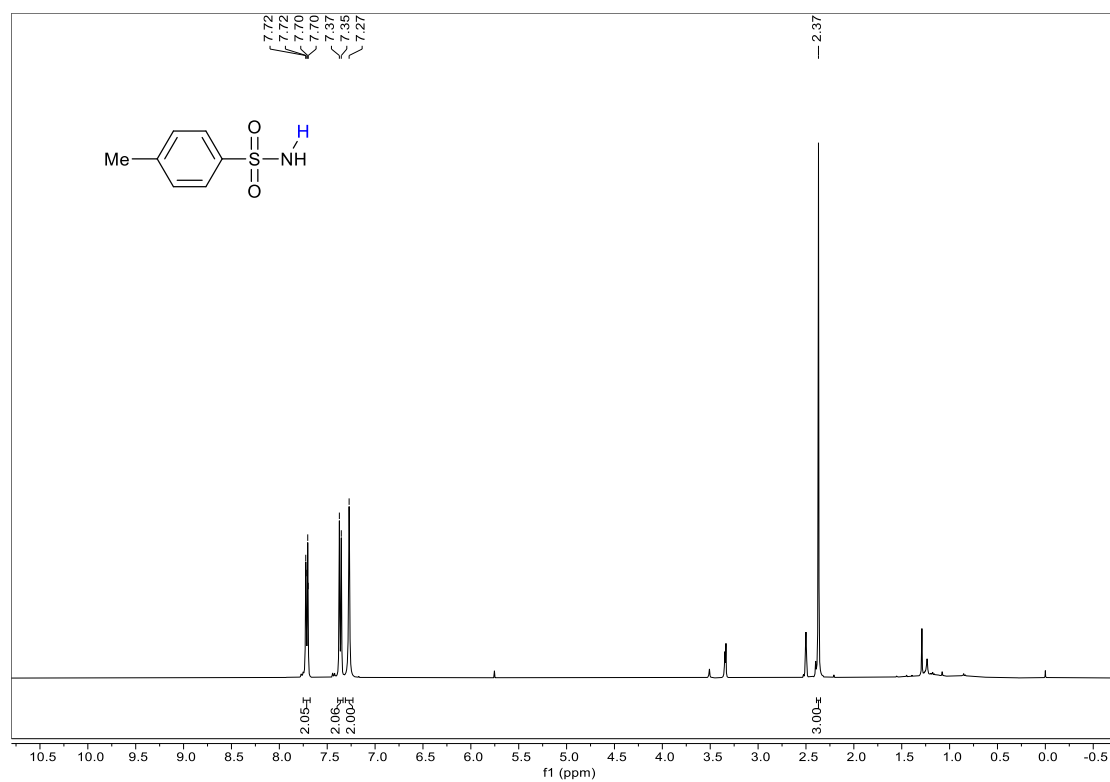

$^{13}\text{C}$  NMR spectra of **4c** (DMSO-*d*<sub>6</sub>, 101 MHz)

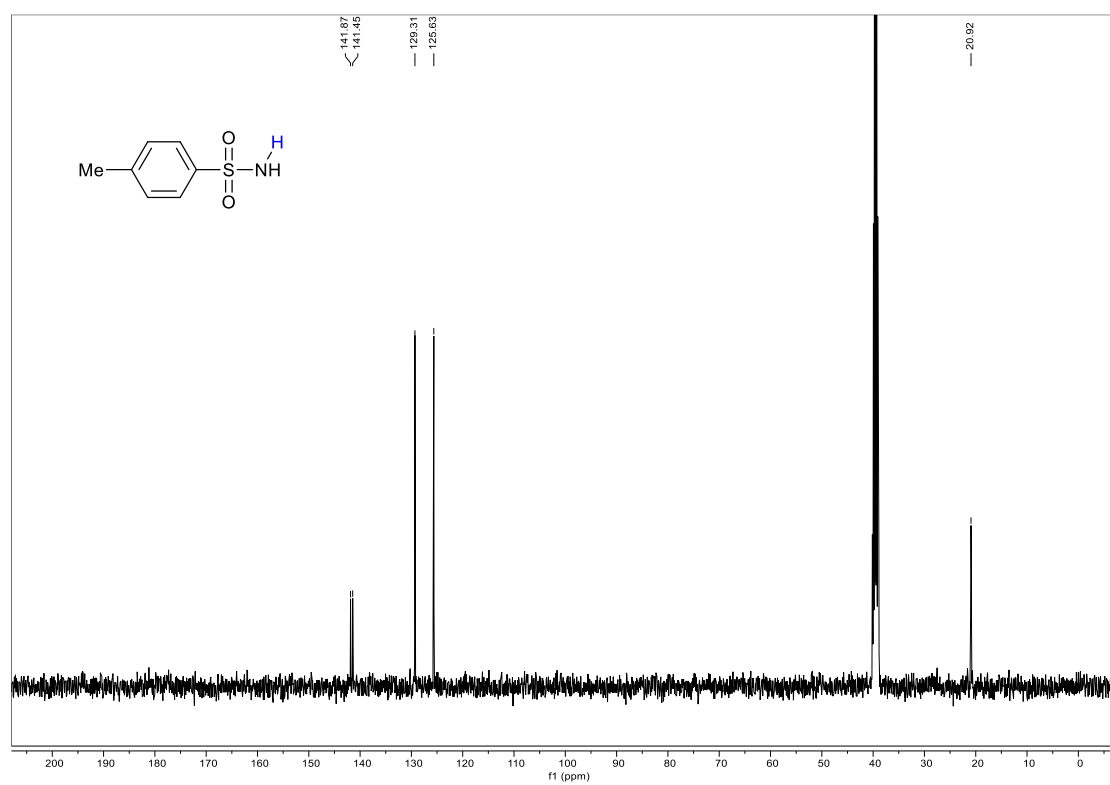

$^1\text{H}$  NMR spectra of **4d** ( $\text{CDCl}_3$ , 400 MHz)

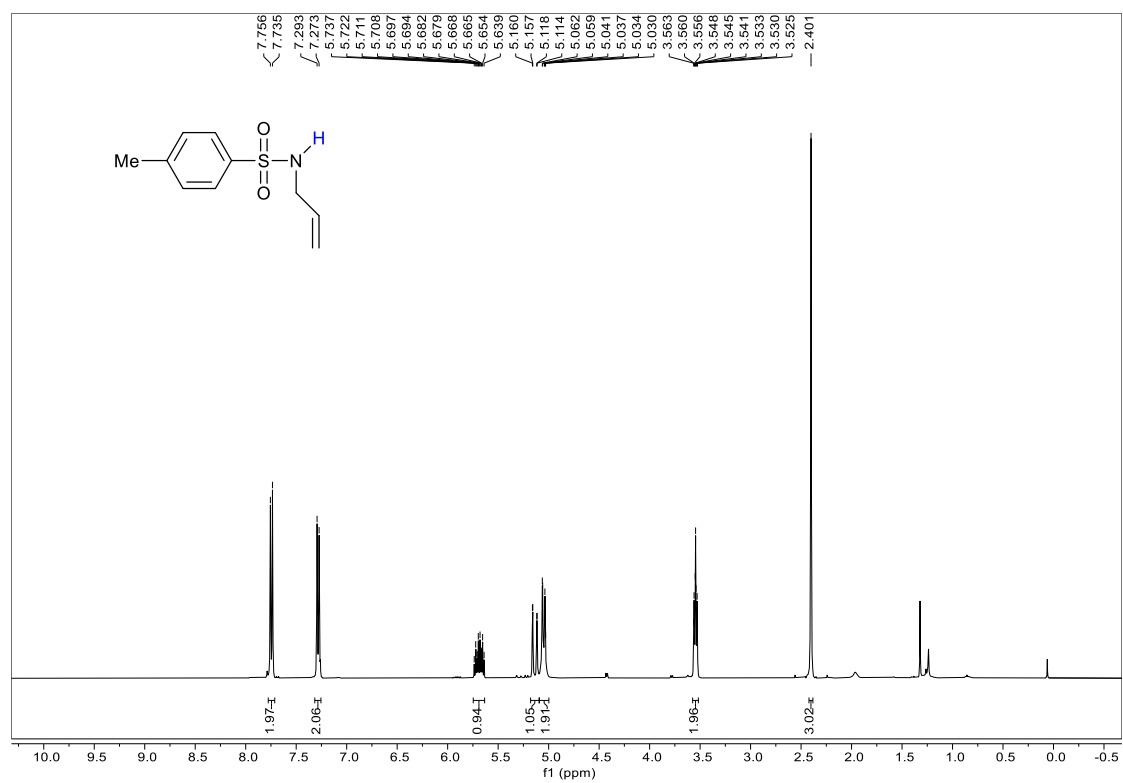

$^{13}\text{C}$  NMR spectra of **4d** ( $\text{CDCl}_3$ , 101 MHz)

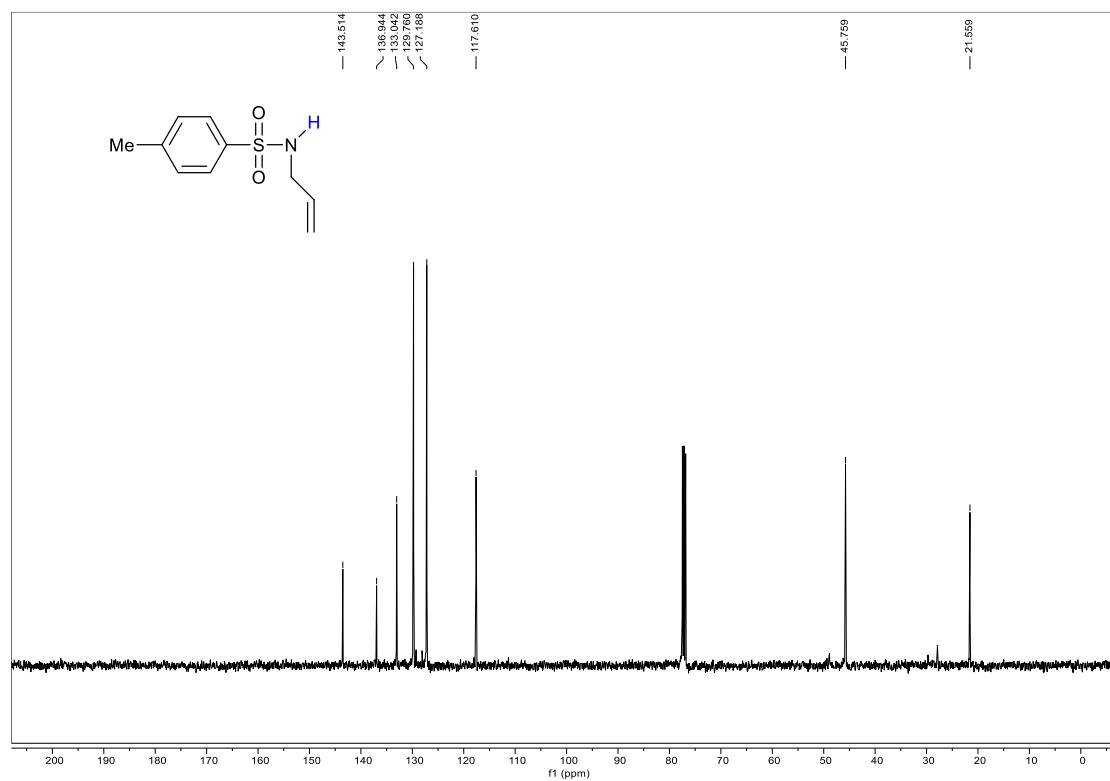

$^1\text{H}$  NMR spectra of **4e** (DMSO-*d*<sub>6</sub>, 400 MHz)

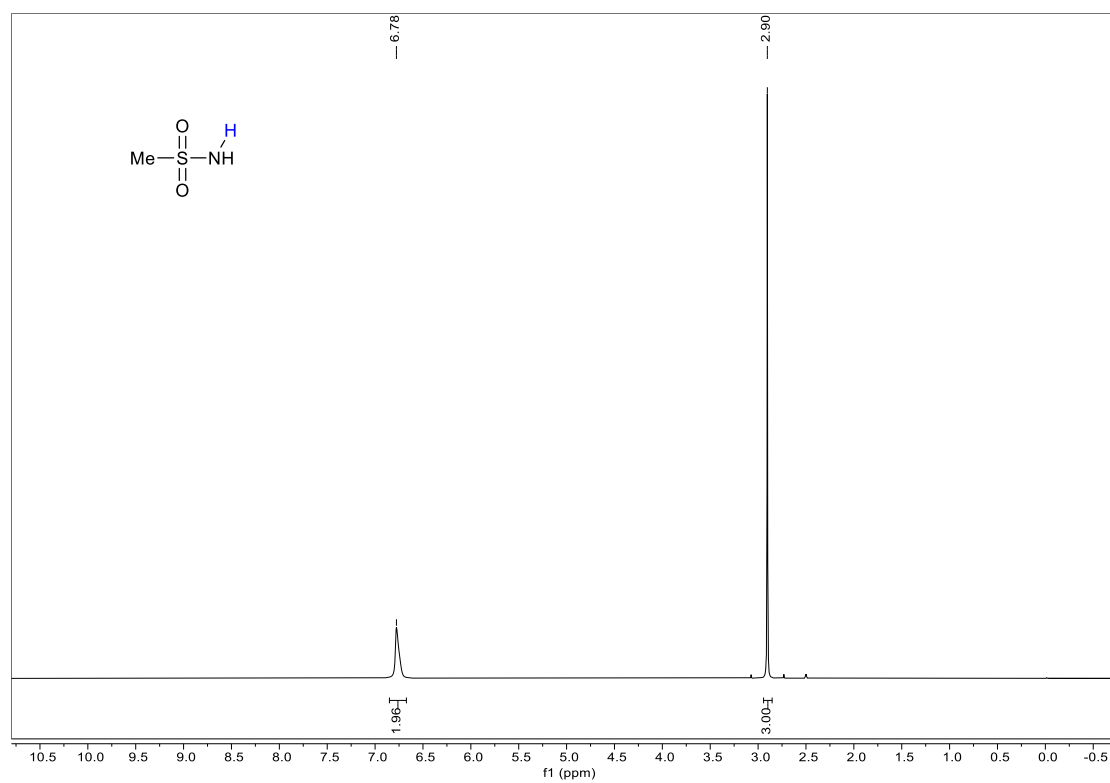

$^{13}\text{C}$  NMR spectra of **4e** (DMSO-*d*<sub>6</sub>, 101 MHz)

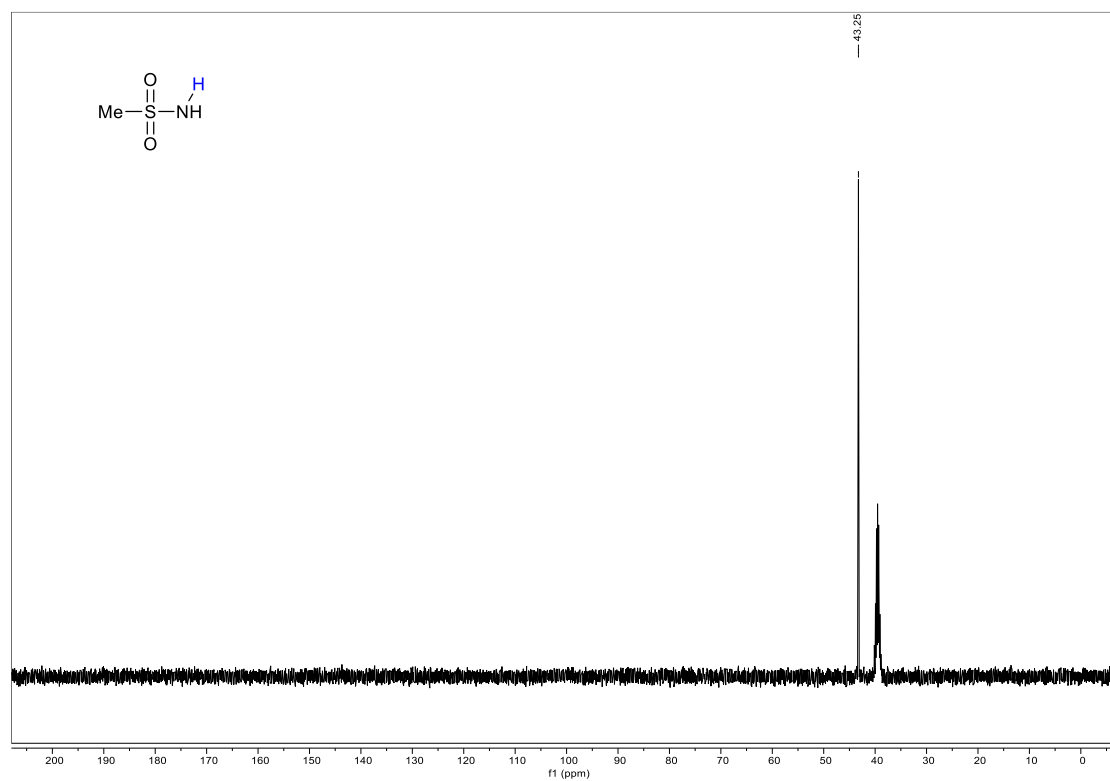



$^1\text{H}$  NMR spectra of **4f** ( $\text{CDCl}_3$ , 400 MHz)

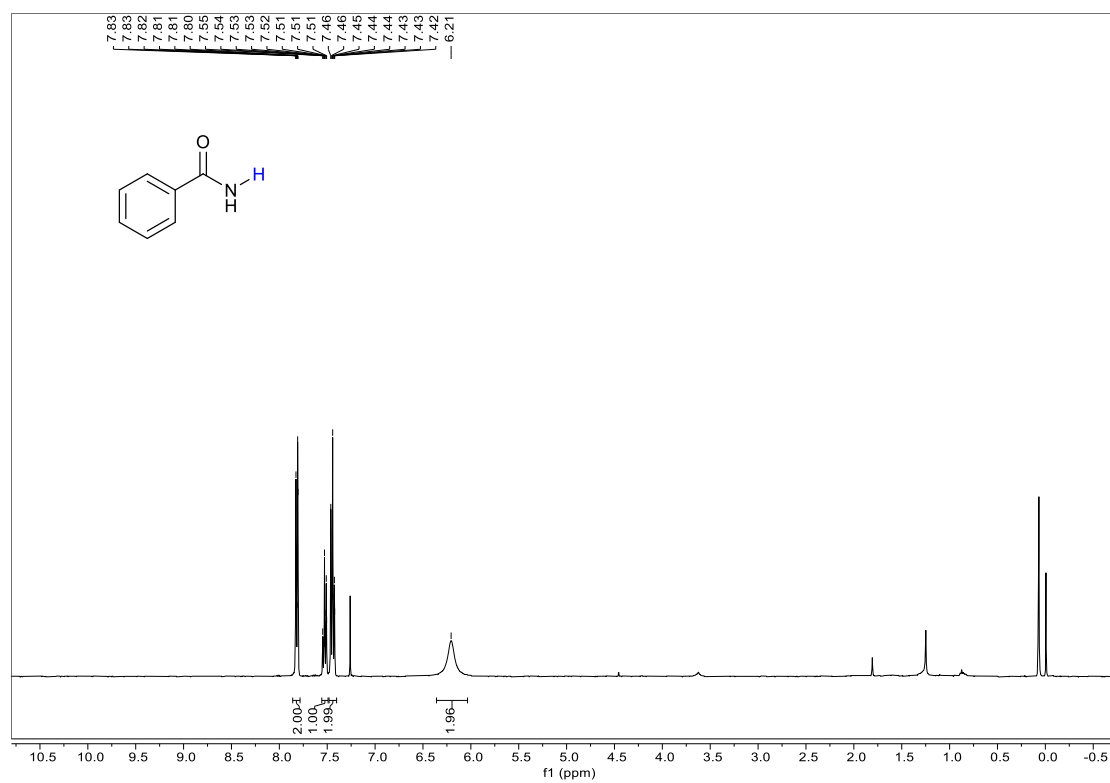

$^{13}\text{C}$  NMR spectra of **4f** ( $\text{CDCl}_3$ , 101 MHz)

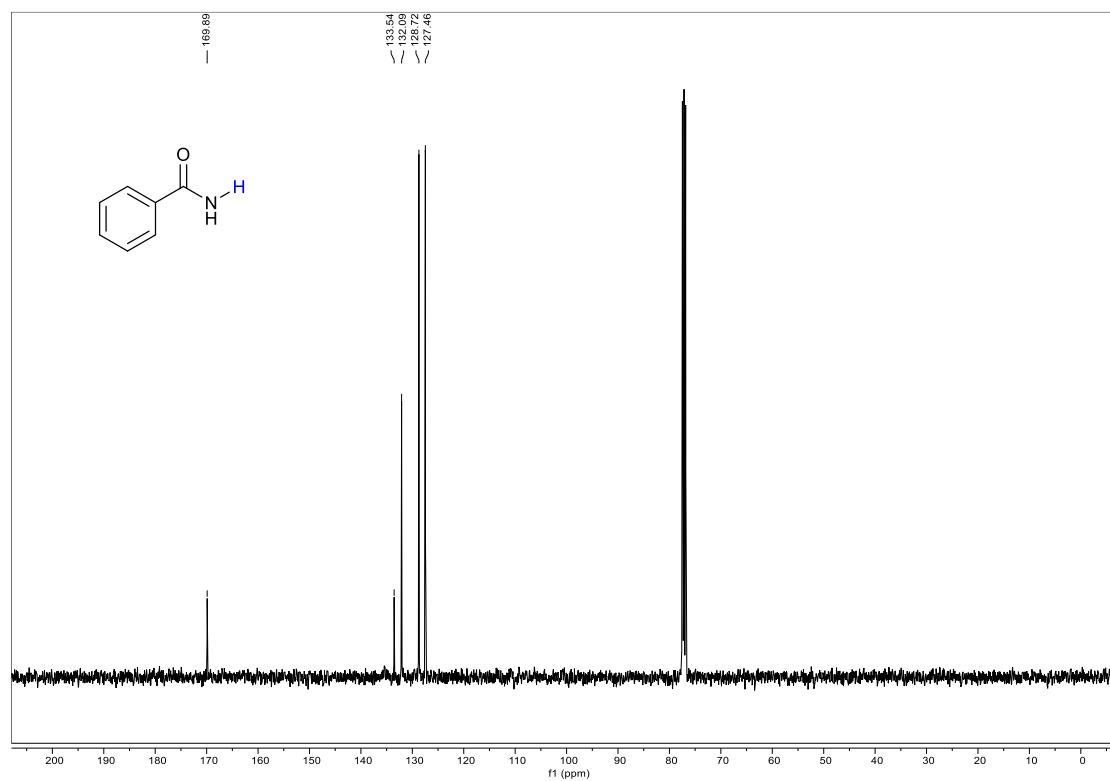

$^1\text{H}$  NMR spectra of **4g** ( $\text{CDCl}_3$ , 400 MHz)

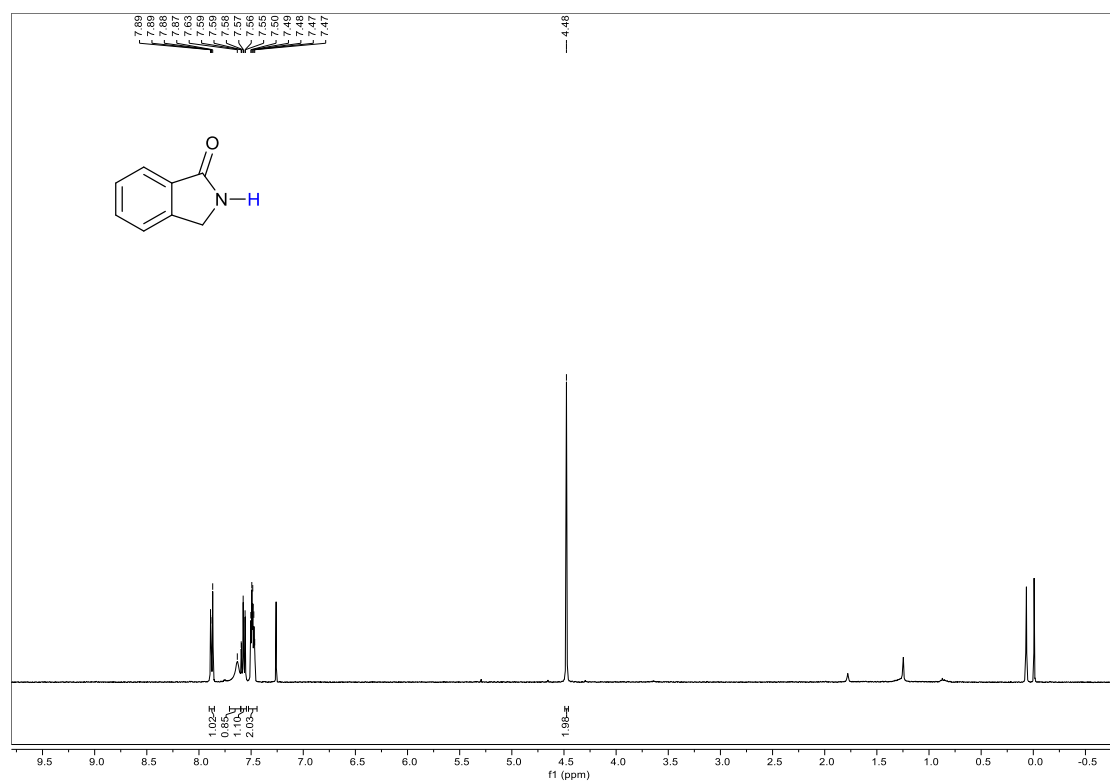

$^{13}\text{C}$  NMR spectra of **4g** ( $\text{CDCl}_3$ , 101 MHz)

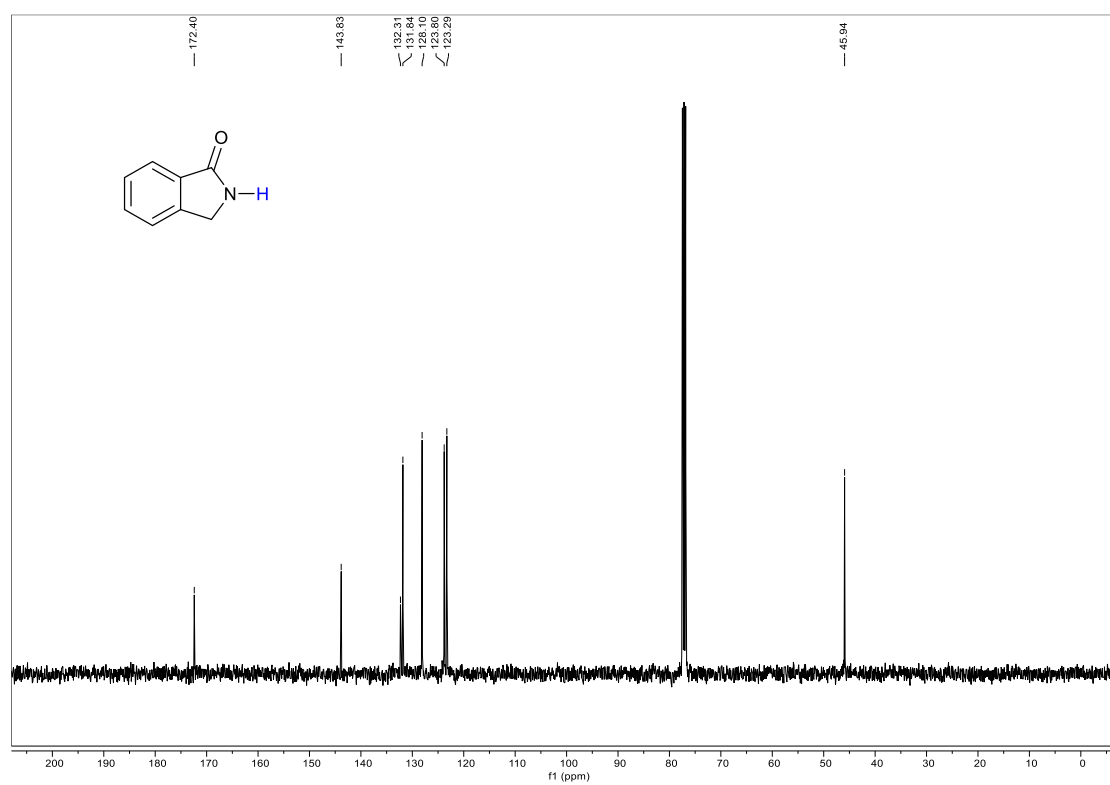

$^1\text{H}$  NMR spectra of **4h** (DMSO- $d_6$ , 400 MHz)

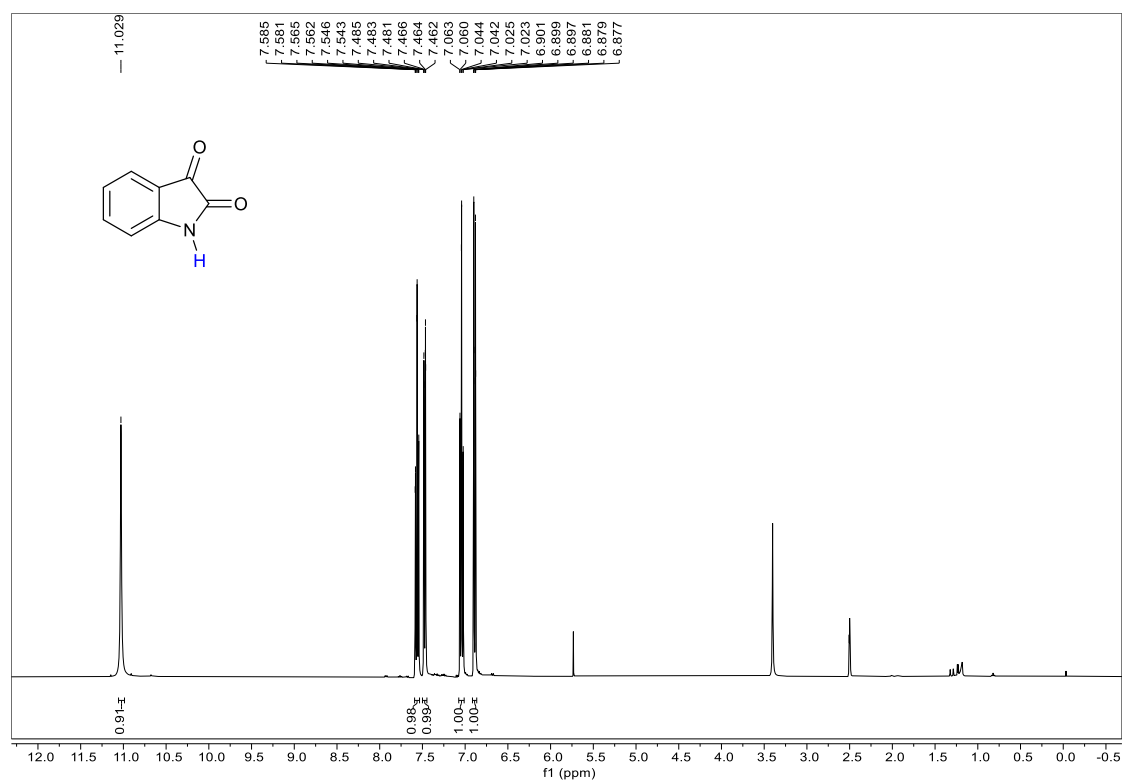

$^{13}\text{C}$  NMR spectra of **4h** (DMSO- $d_6$ , 101 MHz)

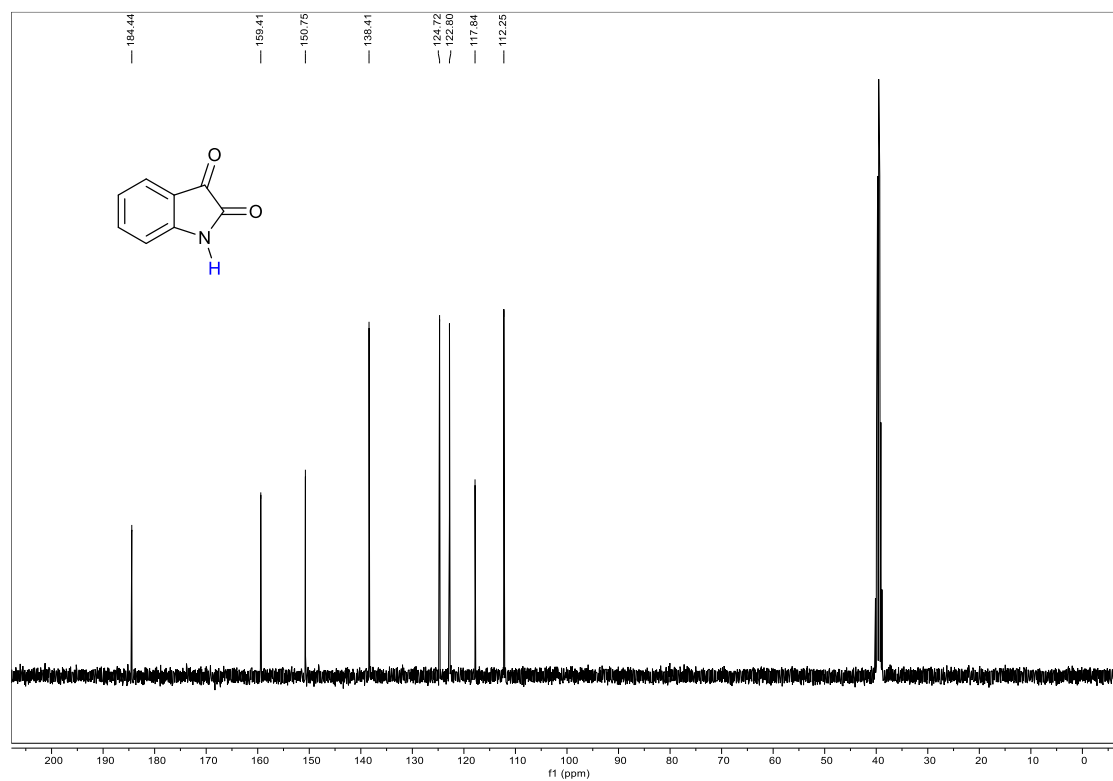

$^1\text{H}$  NMR spectra of **4i** ( $\text{CDCl}_3$ , 400 MHz)

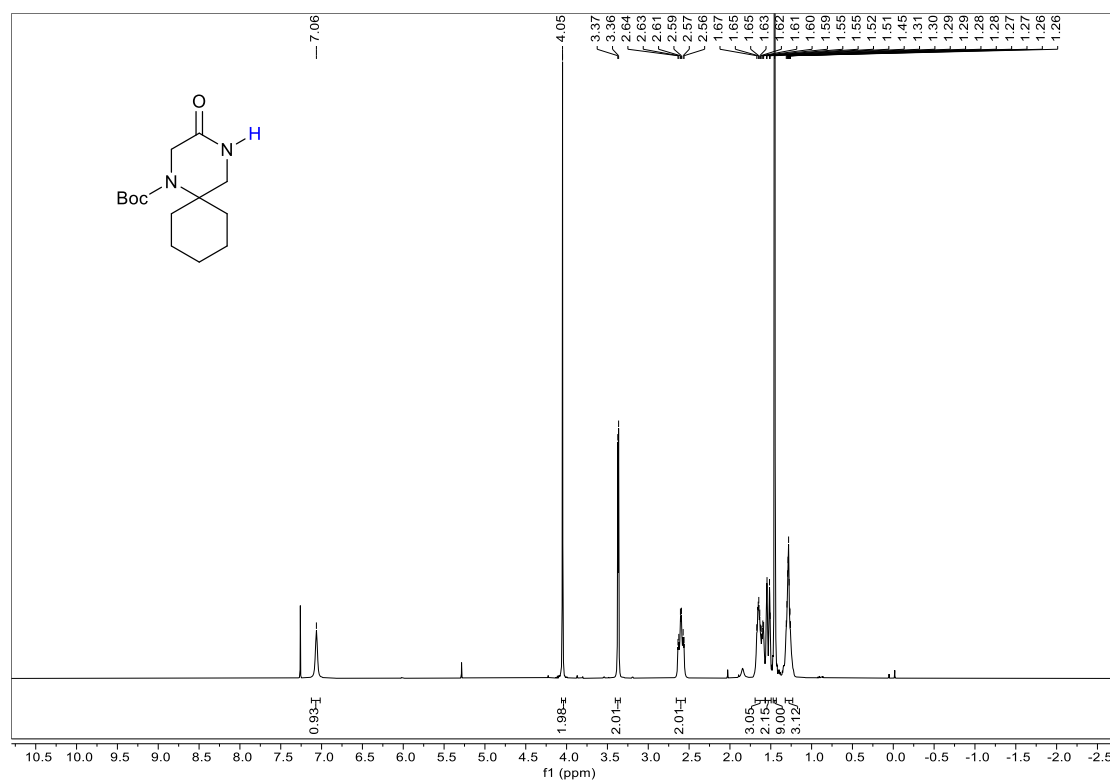

$^{13}\text{C}$  NMR spectra of **4i** ( $\text{CDCl}_3$ , 101 MHz)

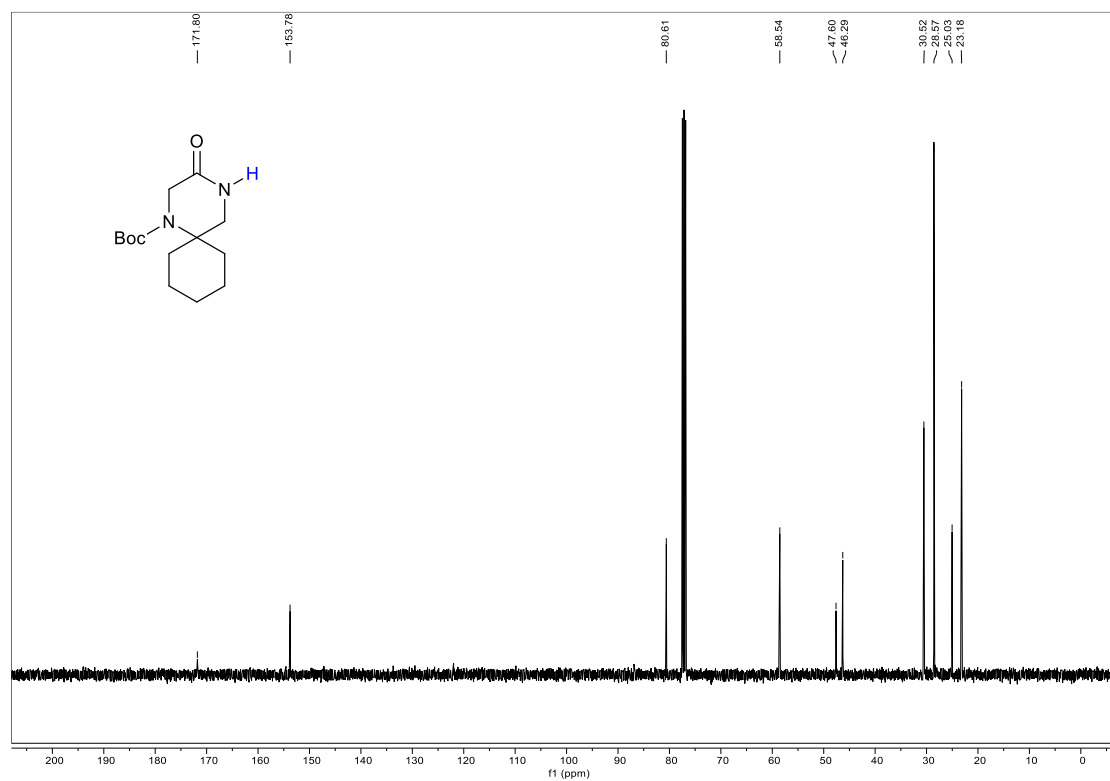

$^1\text{H}$  NMR spectra of **6a** ( $\text{CDCl}_3$ , 400 MHz)

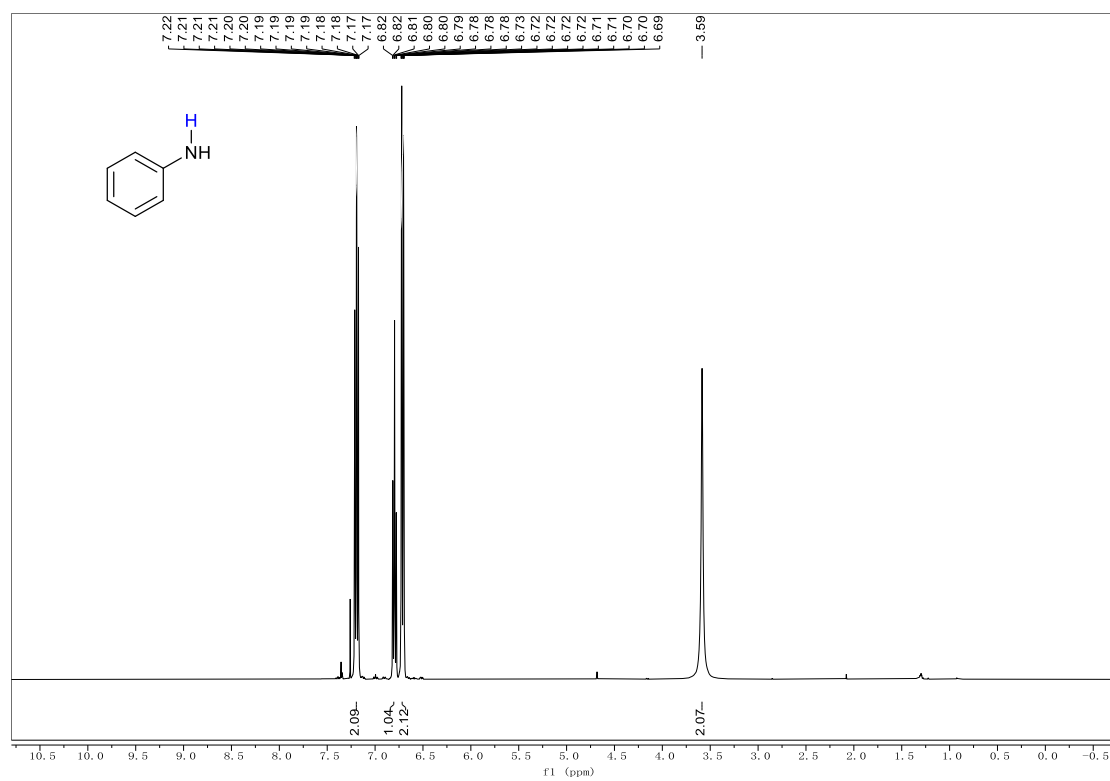

$^{13}\text{C}$  NMR spectra of **6a** ( $\text{CDCl}_3$ , 101 MHz)

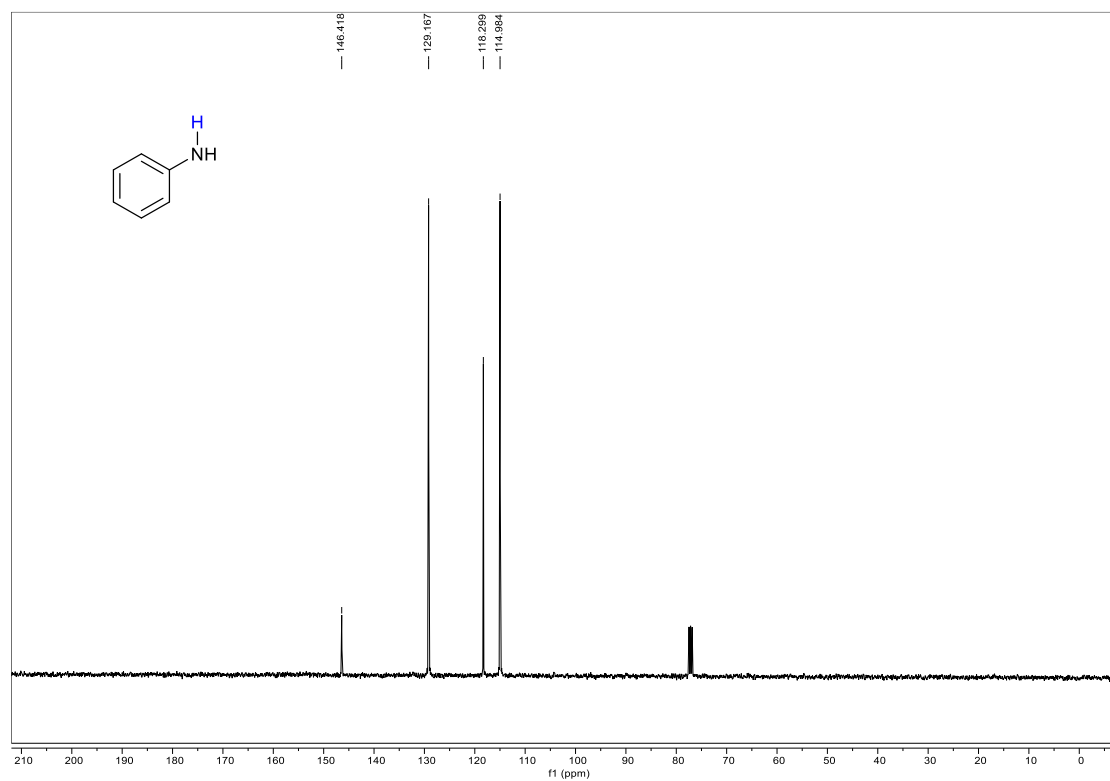

$^1\text{H}$  NMR spectra of **6b** (DMSO- $d_6$ , 400 MHz)

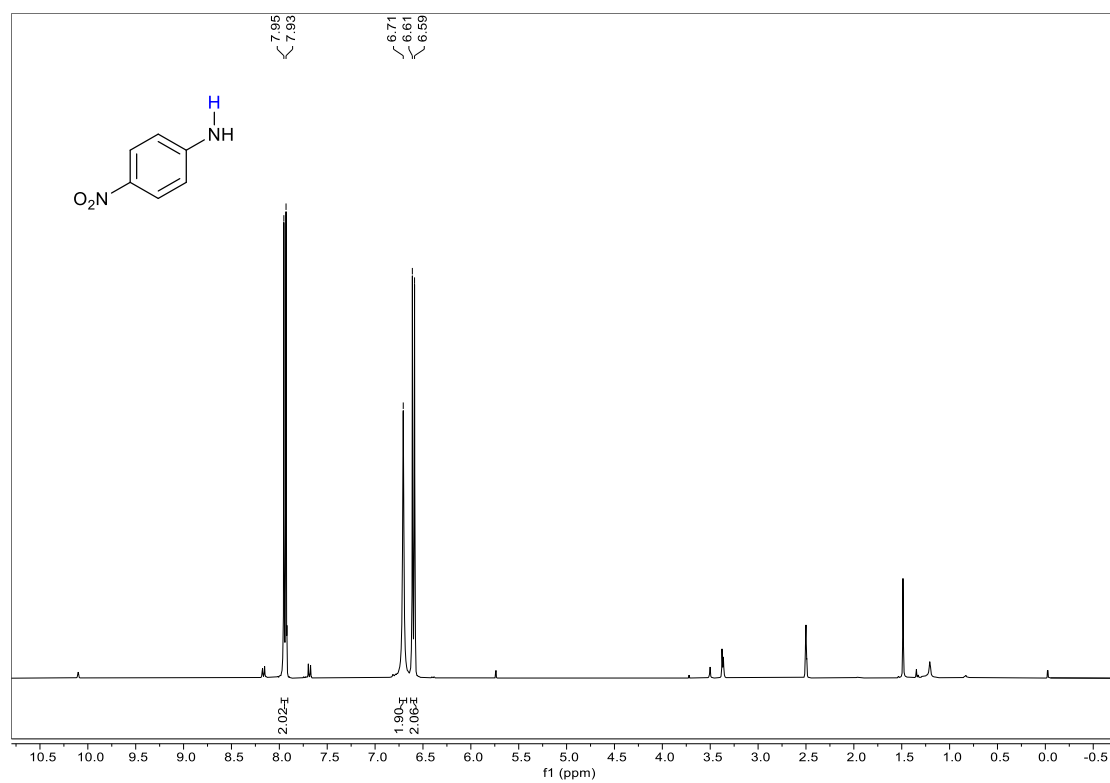

$^{13}\text{C}$  NMR spectra of **6b** (DMSO- $d_6$ , 101 MHz)

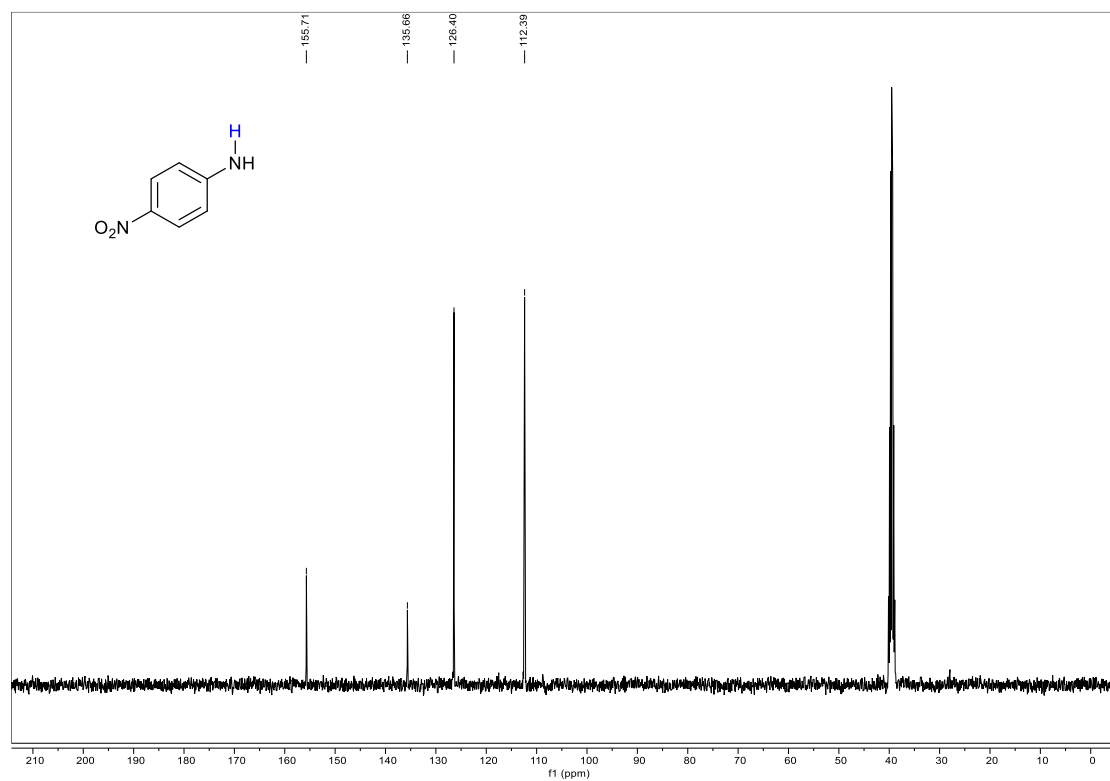

$^1\text{H}$  NMR spectra of **6c** ( $\text{CDCl}_3$ , 400 MHz)

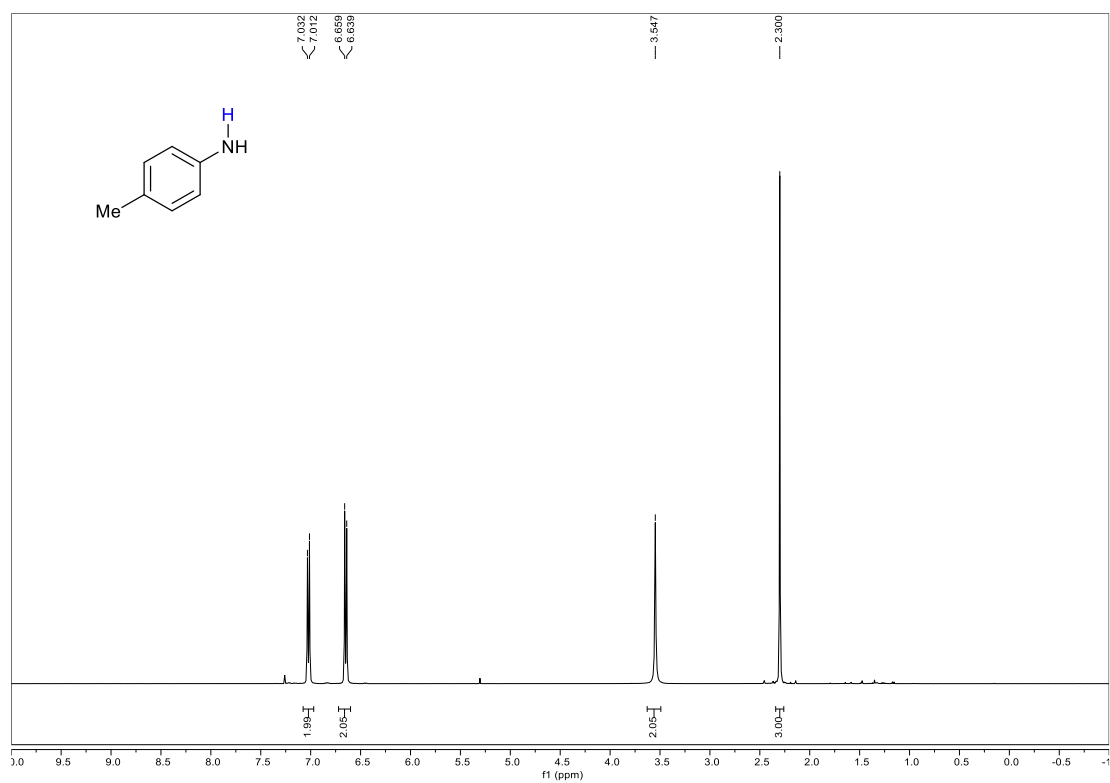

$^{13}\text{C}$  NMR spectra of **6c** ( $\text{CDCl}_3$ , 101 MHz)

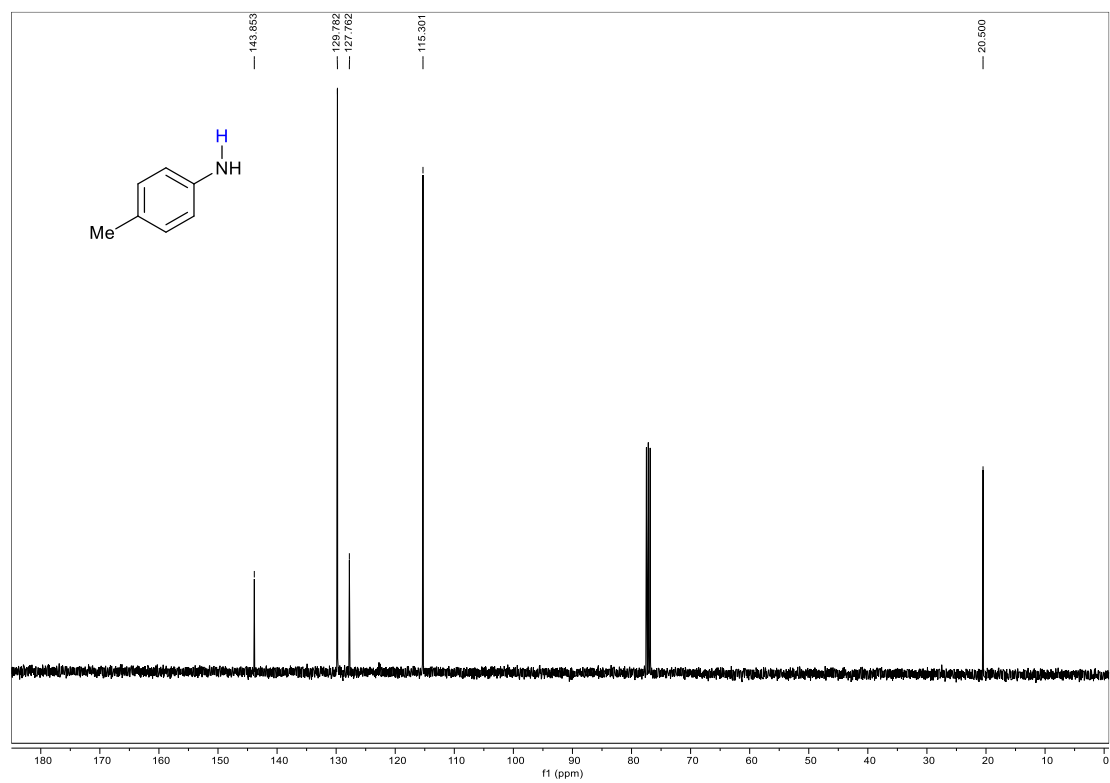

$^1\text{H}$  NMR spectra of **6d** ( $\text{CDCl}_3$ , 400 MHz)

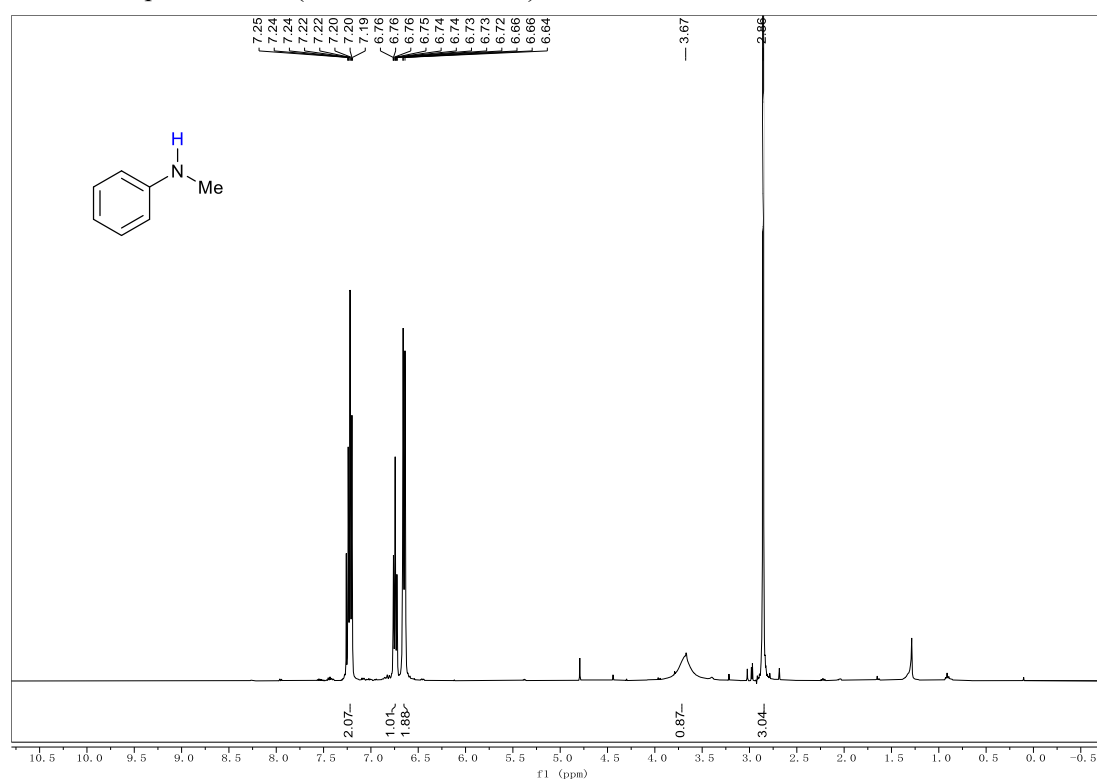

$^{13}\text{C}$  NMR spectra of **6d** ( $\text{CDCl}_3$ , 101 MHz)

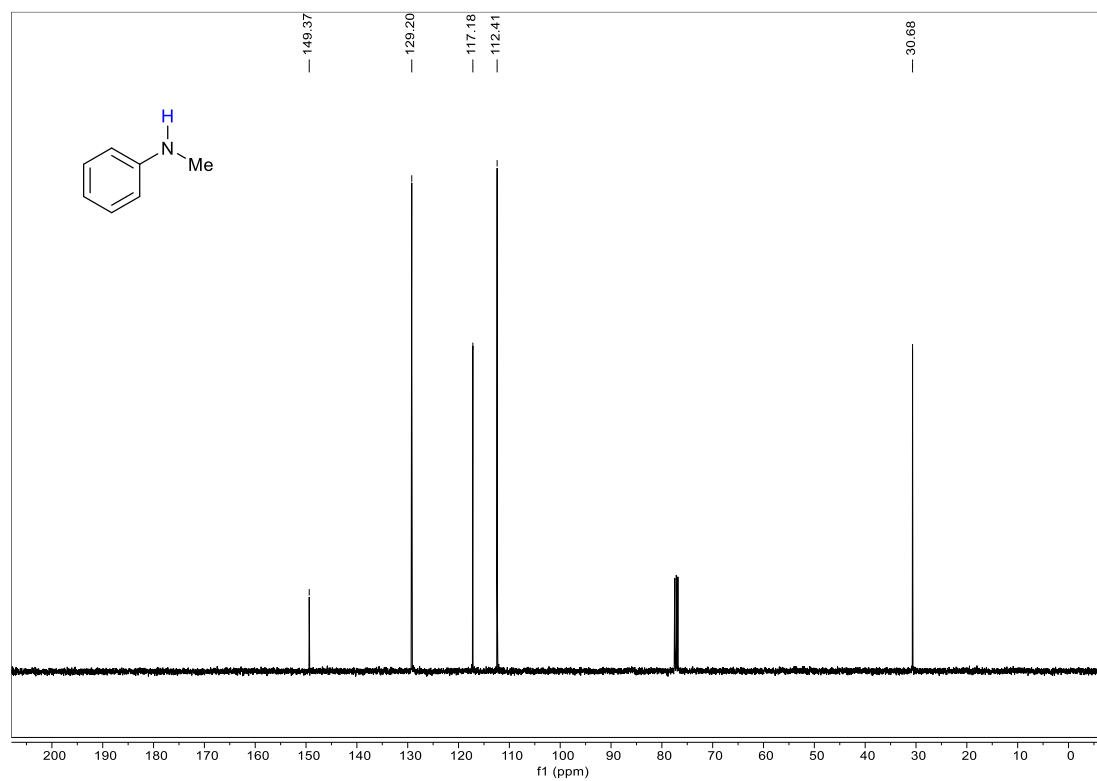



$^1\text{H}$  NMR spectra of **6e** ( $\text{CDCl}_3$ , 400 MHz)

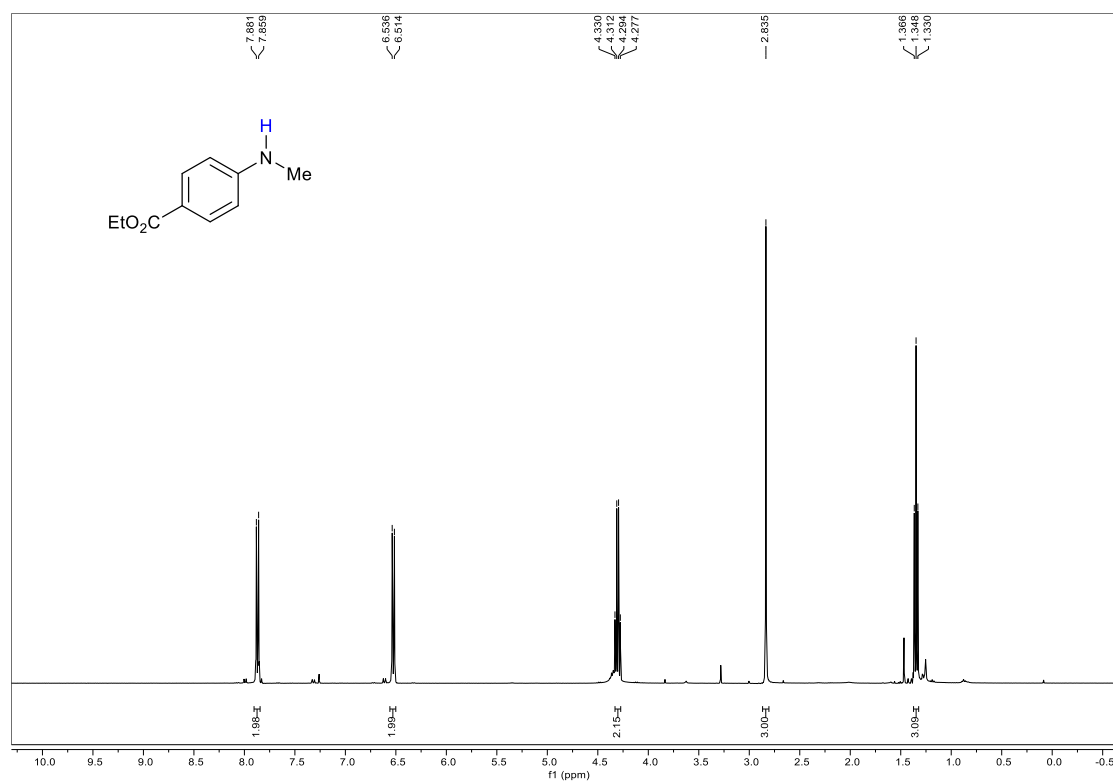

$^{13}\text{C}$  NMR spectra of **6e** ( $\text{CDCl}_3$ , 101 MHz)

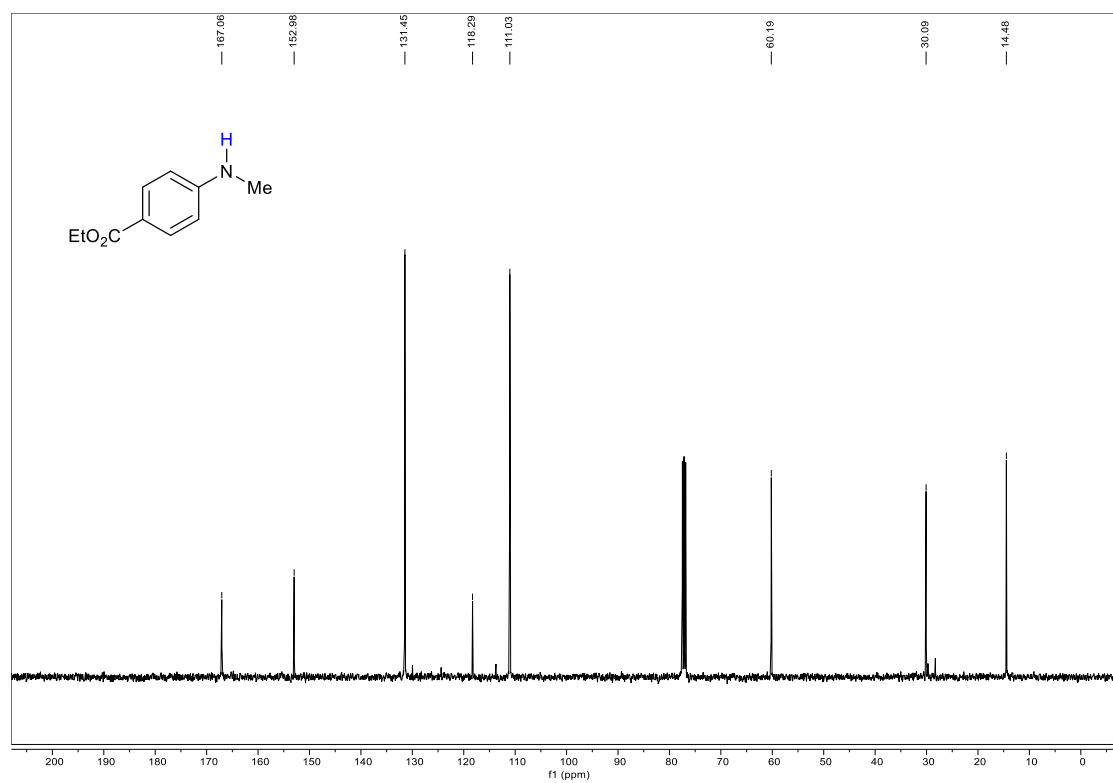

$^1\text{H}$ NMR spectra of **6f** (DMSO- $d_6$ , 400 MHz)

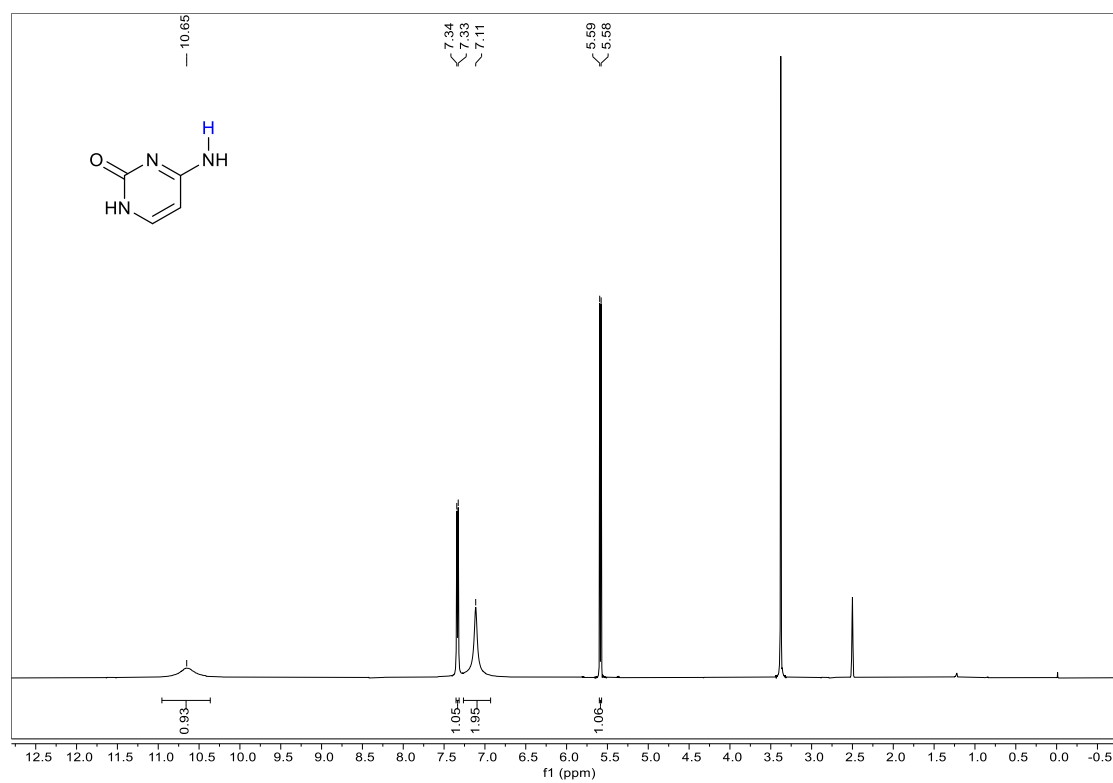

$^{13}\text{C}$  NMR spectra of **6f** (DMSO- $d_6$ , 101 MHz)

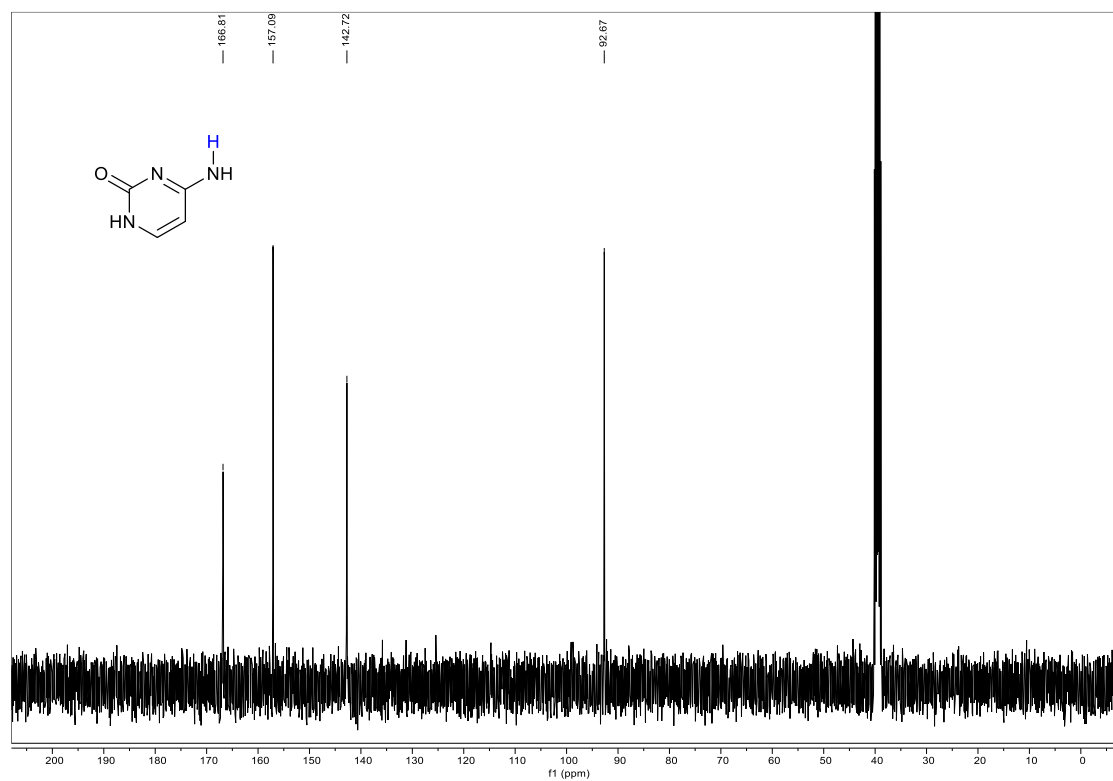

$^1\text{H}$  NMR spectra of **10a** ( $\text{CDCl}_3$ , 400 MHz)

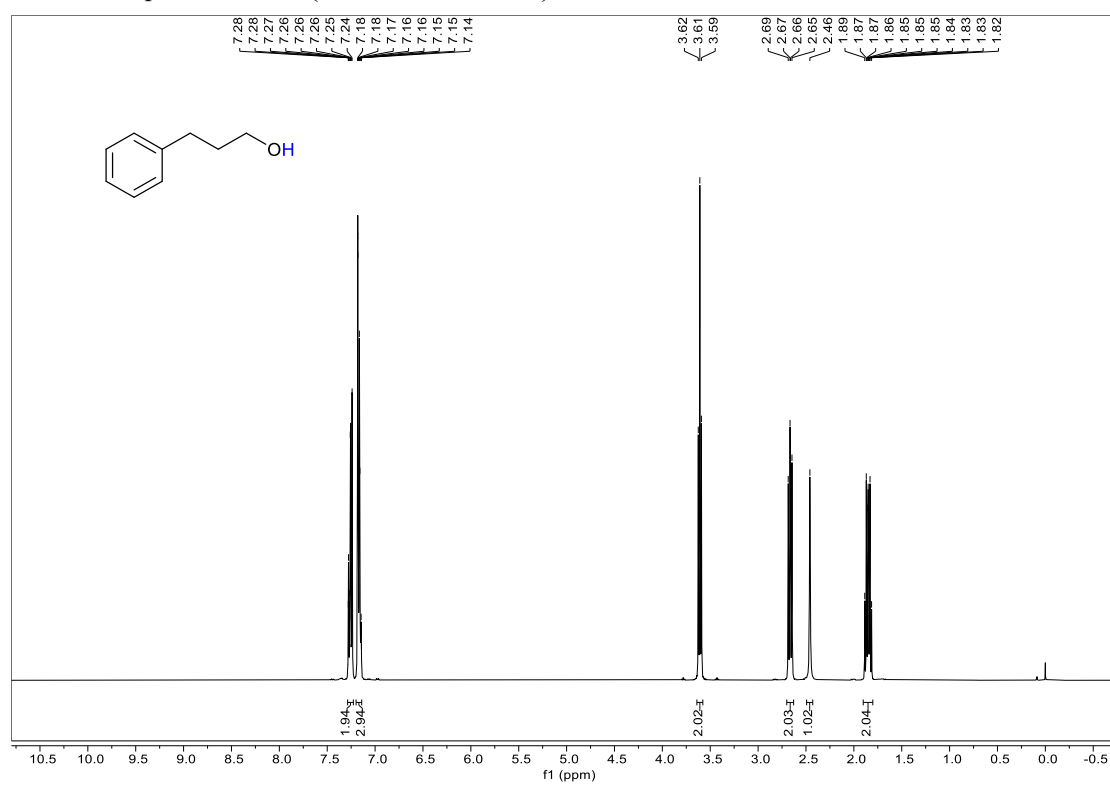

$^{13}\text{C}$  NMR spectra of **10a** ( $\text{CDCl}_3$ , 101 MHz)

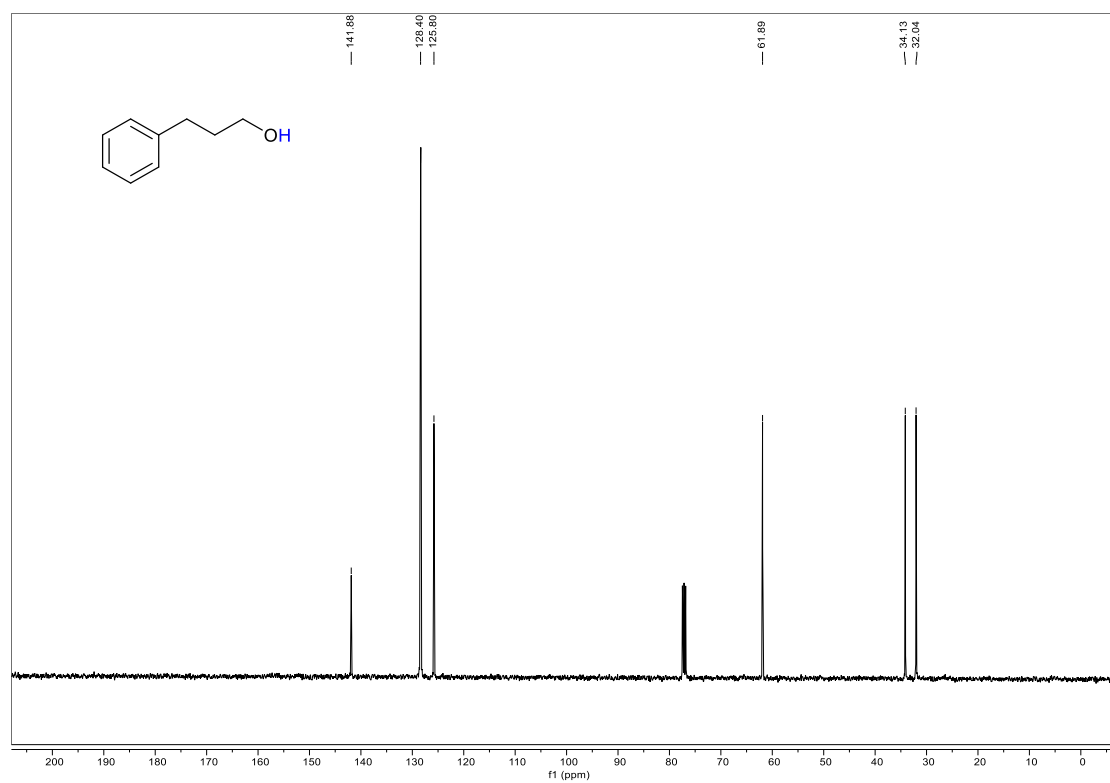

$^1\text{H}$  NMR spectra of **10b** ( $\text{CDCl}_3$ , 400 MHz)

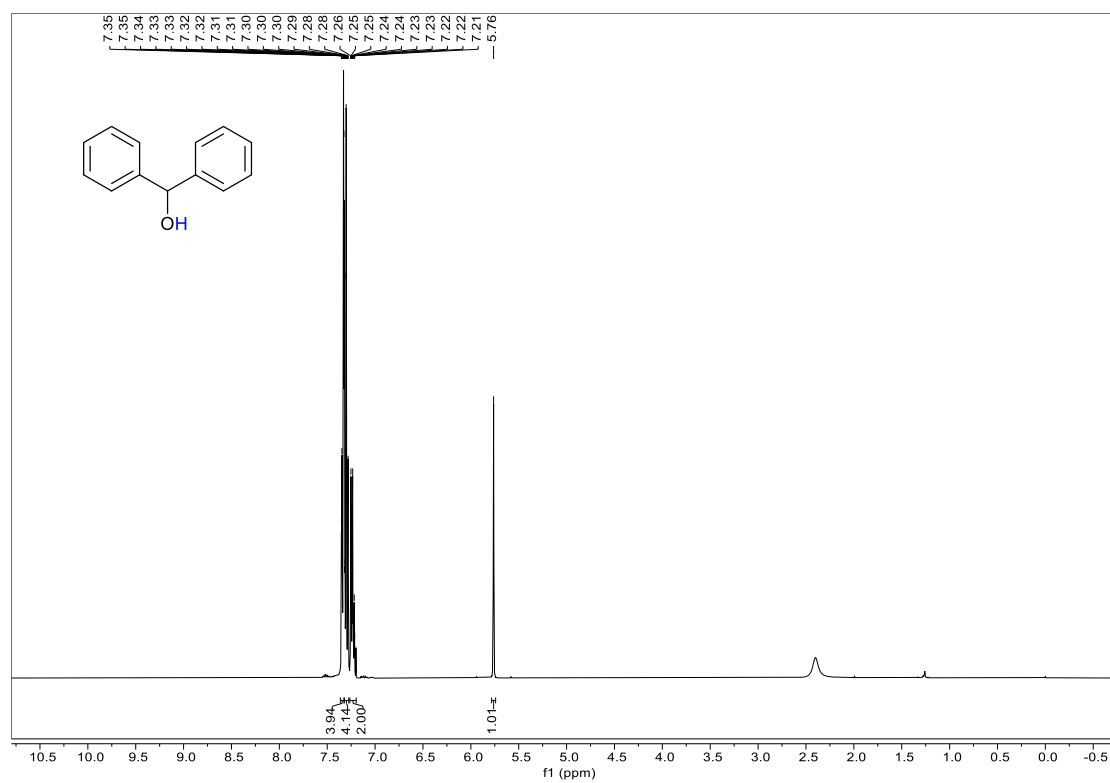

$^{13}\text{C}$  NMR spectra of **10b** ( $\text{CDCl}_3$ , 101 MHz)

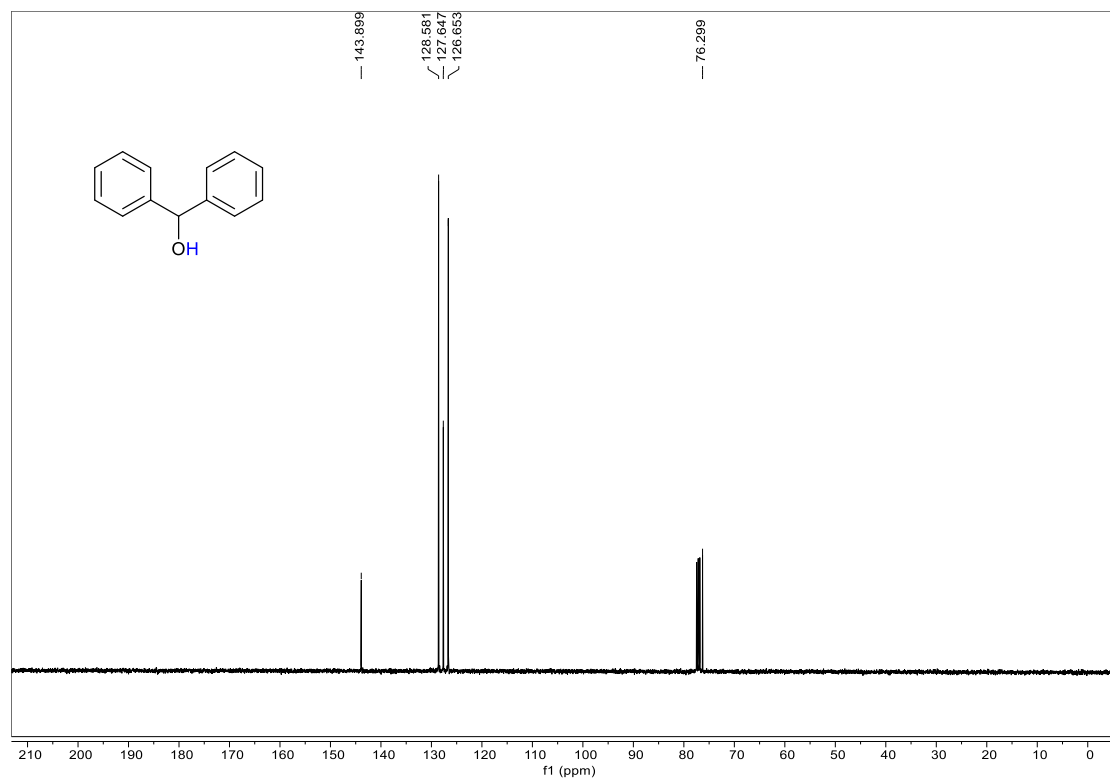

<sup>1</sup>H NMR spectra of **10d** (DMSO-*d*<sub>6</sub>, 400 MHz)

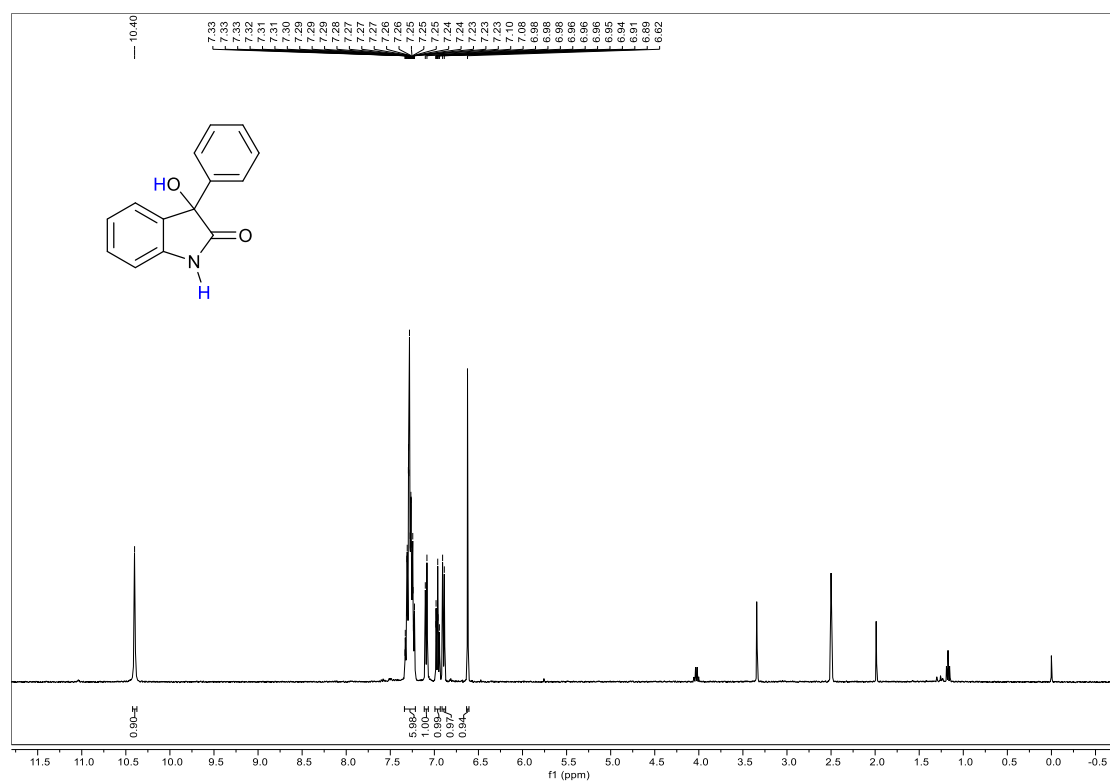

<sup>13</sup>C NMR spectra of **10d** (DMSO-*d*<sub>6</sub>, 101 MHz)

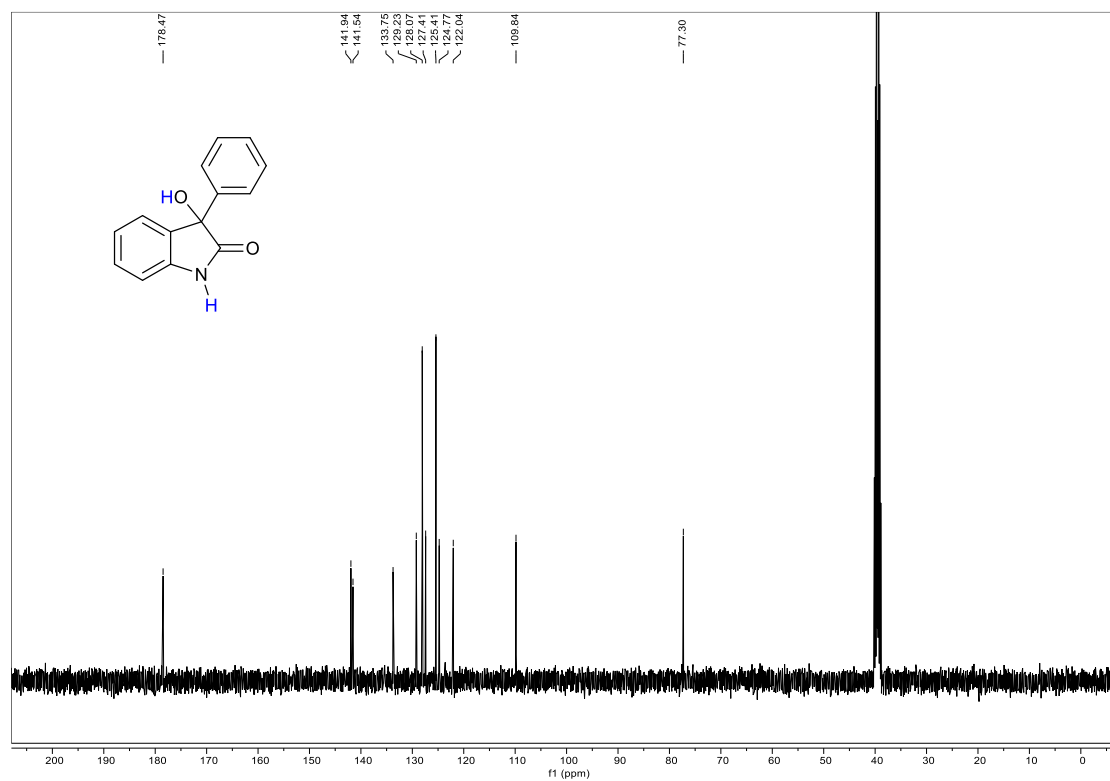

Supplement: d4ob01091d1.pdf [file d4ob01091d1.pdf]
